# Supplementary material for: Transcriptomic Analysis to Identify Melatonin-mediated Salt-responsive Genes During the Germinated Stage of Alfalfa
Source: Preprints.org preprint supplement (doi:10.20944/preprints202403.0648.v1), 2024-03-12
Supplement: Supplementary file 1 [file supplementary]

## Sheet: Sheet1
Supplemental table S6. All differentially expressed gene modules were identified by weighted gene co-expression network analysis (WGCNA).
seq_id	module	kme	block_id
MsG0080047806.01	turquoise	0.558932	1
MsG0080047818.01	turquoise	0.0247886	1
MsG0080047815.01	blue	0.744324	1
MsG0080047802.01	blue	0.869035	1
MsG0080047811.01	red	0.6127	1
MsG0080047788.01	greenyellow	0.848679	1
MsG0080047787.01	blue	0.399279	1
MsG0080047789.01	grey	-0.592635	1
MsG0080047803.01	blue	0.585284	1
MsG0080047812.01	turquoise	0.528293	1
MsG0080047793.01	turquoise	0.892058	1
MsG0080047813.01	blue	0.312764	1
MsG0080047826.01	purple	0.775594	1
MsG0080047832.01	brown	0.622215	1
MsG0080047831.01	turquoise	0.773302	1
MsG0080047820.01	blue	0.270557	1
MsG0080048057.01	turquoise	0.878562	1
MsG0080048213.01	brown	0.438527	1
MsG0080048224.01	turquoise	0.283399	1
MsG0080048271.01	turquoise	0.589525	1
MsG0080047959.01	blue	0.724975	1
MsG0080048054.01	turquoise	0.308173	1
MsG0080048206.01	turquoise	0.946578	1
MsG0080048267.01	black	0.781591	1
MsG0080048301.01	turquoise	0.811144	1
MsG0080047900.01	turquoise	0.487456	1
MsG0080048205.01	turquoise	0.857654	1
MsG0080048314.01	blue	0.628142	1
MsG0080048317.01	turquoise	0.534055	1
MsG0080047939.01	green	0.681506	1
MsG0080047941.01	red	0.359229	1
MsG0080047956.01	pink	0.426853	1
MsG0080047974.01	blue	0.875758	1
MsG0080047976.01	blue	0.447748	1
MsG0080047993.01	turquoise	0.587001	1
MsG0080048050.01	turquoise	0.34631	1
MsG0080048137.01	green	0.0121083	1
MsG0080048275.01	blue	0.286583	1
MsG0080048281.01	blue	0.285039	1
MsG0080047861.01	turquoise	0.33212	1
MsG0080047877.01	turquoise	0.902684	1
MsG0080047897.01	turquoise	0.666998	1
MsG0080047899.01	blue	0.432389	1
MsG0080047963.01	green	0.771297	1
MsG0080047996.01	turquoise	0.351221	1
MsG0080048035.01	turquoise	0.937673	1
MsG0080048084.01	turquoise	0.383549	1
MsG0080048312.01	turquoise	0.873629	1
MsG0080047943.01	turquoise	0.608554	1
MsG0080048051.01	turquoise	0.339262	1
MsG0080048110.01	blue	0.313875	1
MsG0080047909.01	turquoise	0.311123	1
MsG0080048159.01	brown	0.499222	1
MsG0080048163.01	brown	0.606008	1
MsG0080047874.01	red	0.547624	1
MsG0080047935.01	turquoise	0.780298	1
MsG0080047949.01	yellow	0.794437	1
MsG0080047912.01	blue	0.0214391	1
MsG0080047962.01	yellow	0.692957	1
MsG0080048223.01	blue	0.184684	1
MsG0080047968.01	blue	0.927128	1
MsG0080048019.01	blue	0.225559	1
MsG0080047960.01	turquoise	0.575791	1
MsG0080047977.01	yellow	0.63503	1
MsG0080048027.01	turquoise	0.805294	1
MsG0080048220.01	blue	0.82052	1
MsG0080048221.01	turquoise	0.252	1
MsG0080048291.01	green	0.608512	1
MsG0080048298.01	yellow	0.613968	1
MsG0080048319.01	yellow	0.341047	1
MsG0080048186.01	blue	0.833084	1
MsG0080047885.01	turquoise	0.763099	1
MsG0080047924.01	green	0.645389	1
MsG0080047991.01	black	0.533457	1
MsG0080048254.01	brown	0.617495	1
MsG0080048313.01	yellow	0.740295	1
MsG0080047841.01	turquoise	0.337386	1
MsG0080047966.01	turquoise	0.114447	1
MsG0080047997.01	yellow	0.245116	1
MsG0080048043.01	turquoise	0.586482	1
MsG0080048072.01	turquoise	0.210157	1
MsG0080048094.01	turquoise	-0.112621	1
MsG0080048106.01	turquoise	0.451098	1
MsG0080048178.01	turquoise	0.845929	1
MsG0080048214.01	brown	0.577491	1
MsG0080048305.01	blue	0.810421	1
MsG0080047873.01	grey	0.045577	1
MsG0080047987.01	turquoise	0.424455	1
MsG0080048069.01	brown	0.698237	1
MsG0080048087.01	blue	0.645737	1
MsG0080048113.01	yellow	0.822683	1
MsG0080048198.01	blue	0.523381	1
MsG0080048203.01	turquoise	0.954024	1
MsG0080048247.01	turquoise	0.190826	1
MsG0080047904.01	blue	0.602805	1
MsG0080048292.01	turquoise	0.596759	1
MsG0080048308.01	turquoise	0.55595	1
MsG0080047950.01	black	0.752009	1
MsG0080047958.01	blue	0.281034	1
MsG0080047995.01	turquoise	0.36484	1
MsG0080048073.01	blue	0.49392	1
MsG0080048259.01	black	0.795767	1
MsG0080048289.01	blue	0.521202	1
MsG0080048302.01	turquoise	0.645232	1
MsG0080047910.01	turquoise	0.233667	1
MsG0080047952.01	blue	0.418524	1
MsG0080048018.01	turquoise	0.219663	1
MsG0080048065.01	turquoise	0.421466	1
MsG0080048195.01	green	0.027607	1
MsG0080048197.01	brown	0.219121	1
MsG0080048231.01	red	0.439441	1
MsG0080048240.01	brown	0.467961	1
MsG0080047905.01	turquoise	0.066542	1
MsG0080047942.01	turquoise	0.654639	1
MsG0080047954.01	red	0.556746	1
MsG0080047994.01	turquoise	0.459413	1
MsG0080048046.01	brown	0.415572	1
MsG0080048047.01	turquoise	0.545931	1
MsG0080048107.01	blue	0.586179	1
MsG0080048151.01	yellow	0.720294	1
MsG0080048243.01	turquoise	-0.073403	1
MsG0080048276.01	brown	0.22321	1
MsG0080048309.01	turquoise	0.889985	1
MsG0080048315.01	turquoise	0.910665	1
MsG0080047940.01	blue	0.0819986	1
MsG0080047973.01	blue	0.55832	1
MsG0080047992.01	turquoise	0.296491	1
MsG0080048008.01	turquoise	-0.162088	1
MsG0080048029.01	turquoise	0.714779	1
MsG0080048085.01	brown	0.657563	1
MsG0080048086.01	brown	0.876485	1
MsG0080048152.01	turquoise	-0.0249511	1
MsG0080048177.01	turquoise	0.69193	1
MsG0080048215.01	brown	0.603382	1
MsG0080048222.01	turquoise	-0.0166154	1
MsG0080048232.01	blue	0.912269	1
MsG0080048248.01	blue	0.287192	1
MsG0080048283.01	turquoise	0.860188	1
MsG0080048287.01	turquoise	0.327307	1
MsG0080048299.01	turquoise	0.711202	1
MsG0080047878.01	turquoise	0.632096	1
MsG0080047898.01	turquoise	0.105476	1
MsG0080047927.01	brown	0.778007	1
MsG0080047978.01	turquoise	0.960285	1
MsG0080048048.01	blue	0.315637	1
MsG0080048145.01	blue	0.190706	1
MsG0080048148.01	greenyellow	0.747355	1
MsG0080048227.01	turquoise	0.273486	1
MsG0080048230.01	blue	0.910703	1
MsG0080048253.01	blue	0.772925	1
MsG0080048273.01	turquoise	0.768207	1
MsG0080048290.01	turquoise	-0.518042	1
MsG0080048310.01	yellow	0.801408	1
MsG0080048329.01	blue	0.652087	1
MsG0080048345.01	turquoise	0.939079	1
MsG0080048405.01	turquoise	0.320651	1
MsG0080048456.01	turquoise	0.426243	1
MsG0080048463.01	yellow	0.561436	1
MsG0080048555.01	grey	0.662067	1
MsG0080048556.01	blue	0.703657	1
MsG0080048623.01	blue	0.843067	1
MsG0080048638.01	pink	0.788771	1
MsG0080048686.01	blue	0.709584	1
MsG0080048811.01	blue	0.663562	1
MsG0080048426.01	turquoise	0.380855	1
MsG0080048497.01	blue	0.802179	1
MsG0080048609.01	turquoise	0.891639	1
MsG0080048613.01	brown	0.85091	1
MsG0080048654.01	blue	0.899038	1
MsG0080048683.01	turquoise	0.557158	1
MsG0080048766.01	blue	0.749135	1
MsG0080048819.01	blue	0.697327	1
MsG0080048352.01	turquoise	0.872044	1
MsG0080048528.01	brown	0.621903	1
MsG0080048647.01	turquoise	0.0997372	1
MsG0080048697.01	blue	0.870191	1
MsG0080048732.01	turquoise	0.786692	1
MsG0080048770.01	turquoise	0.433343	1
MsG0080048333.01	turquoise	0.175594	1
MsG0080048399.01	blue	0.806927	1
MsG0080048445.01	turquoise	0.79454	1
MsG0080048633.01	turquoise	0.864226	1
MsG0080048636.01	blue	0.731086	1
MsG0080048716.01	red	0.490987	1
MsG0080048731.01	turquoise	0.82276	1
MsG0080048741.01	red	0.597484	1
MsG0080048773.01	brown	0.798525	1
MsG0080048815.01	brown	0.869807	1
MsG0080048816.01	turquoise	0.884079	1
MsG0080048349.01	turquoise	0.639129	1
MsG0080048374.01	green	0.791466	1
MsG0080048592.01	turquoise	0.870604	1
MsG0080048672.01	turquoise	0.374375	1
MsG0080048743.01	green	0.786667	1
MsG0080048348.01	turquoise	0.861432	1
MsG0080048361.01	turquoise	0.194116	1
MsG0080048451.01	red	0.718015	1
MsG0080048506.01	turquoise	0.775841	1
MsG0080048527.01	brown	-0.299981	1
MsG0080048588.01	blue	0.735943	1
MsG0080048379.01	turquoise	0.385925	1
MsG0080048429.01	blue	0.498579	1
MsG0080048700.01	turquoise	0.656669	1
MsG0080048787.01	turquoise	0.197792	1
MsG0080048346.01	turquoise	0.912468	1
MsG0080048347.01	turquoise	0.862965	1
MsG0080048388.01	black	0.554077	1
MsG0080048437.01	yellow	0.701448	1
MsG0080048503.01	blue	0.911309	1
MsG0080048691.01	blue	0.91771	1
MsG0080048693.01	blue	0.705172	1
MsG0080048738.01	turquoise	0.1511	1
MsG0080048780.01	blue	0.388811	1
MsG0080048353.01	turquoise	0.152256	1
MsG0080048781.01	blue	0.573417	1
MsG0080048785.01	yellow	0.513339	1
MsG0080048492.01	turquoise	0.336325	1
MsG0080048510.01	turquoise	0.759979	1
MsG0080048529.01	turquoise	0.658719	1
MsG0080048554.01	blue	0.115186	1
MsG0080048608.01	turquoise	0.755922	1
MsG0080048635.01	turquoise	0.733866	1
MsG0080048651.01	blue	0.663179	1
MsG0080048684.01	blue	0.416198	1
MsG0080048689.01	blue	0.827476	1
MsG0080048694.01	blue	0.514193	1
MsG0080048712.01	turquoise	0.345282	1
MsG0080048767.01	turquoise	0.137685	1
MsG0080048802.01	blue	0.291282	1
MsG0080048487.01	turquoise	0.451402	1
MsG0080048520.01	blue	0.0196015	1
MsG0080048537.01	yellow	0.776674	1
MsG0080048564.01	yellow	0.539855	1
MsG0080048701.01	turquoise	0.329187	1
MsG0080048714.01	turquoise	0.510304	1
MsG0080048763.01	turquoise	0.60888	1
MsG0080048777.01	blue	0.381413	1
MsG0080048797.01	blue	0.785643	1
MsG0080048810.01	turquoise	0.339986	1
MsG0080048403.01	turquoise	0.685057	1
MsG0080048440.01	red	0.480957	1
MsG0080048598.01	turquoise	0.600086	1
MsG0080048650.01	blue	0.0463813	1
MsG0080048717.01	blue	0.711368	1
MsG0080048794.01	turquoise	0.589617	1
MsG0080048467.01	turquoise	0.707563	1
MsG0080048505.01	blue	0.339203	1
MsG0080048567.01	black	0.566052	1
MsG0080048668.01	yellow	0.71361	1
MsG0080048699.01	blue	0.700337	1
MsG0080048726.01	turquoise	0.302384	1
MsG0080048745.01	turquoise	0.921347	1
MsG0080048754.01	green	0.774017	1
MsG0080048765.01	greenyellow	0.903901	1
MsG0080048805.01	turquoise	0.618049	1
MsG0080048387.01	turquoise	0.965934	1
MsG0080048443.01	turquoise	0.638032	1
MsG0080048569.01	magenta	0.747172	1
MsG0080048604.01	brown	0.762417	1
MsG0080048660.01	blue	0.645702	1
MsG0080048692.01	red	0.410344	1
MsG0080048695.01	turquoise	-0.326197	1
MsG0080048708.01	turquoise	0.67445	1
MsG0080048724.01	blue	0.407874	1
MsG0080048761.01	turquoise	0.783223	1
MsG0080048509.01	turquoise	0.489491	1
MsG0080048560.01	blue	0.864064	1
MsG0080048597.01	blue	0.680235	1
MsG0080048757.01	brown	0.459457	1
MsG0080048818.01	brown	0.573887	1
MsG0080048322.01	blue	0.307729	1
MsG0080048423.01	pink	0.681189	1
MsG0080048454.01	turquoise	0.539721	1
MsG0080048460.01	turquoise	0.0916279	1
MsG0080048599.01	blue	0.459957	1
MsG0080048357.01	blue	0.958824	1
MsG0080048621.01	turquoise	0.816098	1
MsG0080048698.01	blue	0.599014	1
MsG0080048748.01	brown	0.751703	1
MsG0080048764.01	brown	0.702516	1
MsG0080048428.01	yellow	0.540309	1
MsG0080048801.01	green	0.896914	1
MsG0080048634.01	blue	0.382626	1
MsG0080048676.01	brown	0.489167	1
MsG0080048775.01	blue	0.606418	1
MsG0080048776.01	blue	0.384302	1
MsG0080048778.01	turquoise	0.636151	1
MsG0080048800.01	blue	0.467536	1
MsG0080048354.01	turquoise	0.212812	1
MsG0080048389.01	grey	-0.512041	1
MsG0080048397.01	blue	0.725997	1
MsG0080048458.01	turquoise	0.722263	1
MsG0080048462.01	red	0.520788	1
MsG0080048511.01	turquoise	0.306263	1
MsG0080048600.01	turquoise	0.442463	1
MsG0080048619.01	turquoise	0.705153	1
MsG0080048690.01	blue	0.714121	1
MsG0080048709.01	turquoise	0.788841	1
MsG0080048711.01	turquoise	0.272074	1
MsG0080048755.01	turquoise	0.611745	1
MsG0080048772.01	red	0.657224	1
MsG0080048809.01	blue	0.820513	1
MsG0080048836.01	turquoise	0.105248	1
MsG0080048826.01	turquoise	0.165324	1
MsG0080048833.01	turquoise	0.421636	1
MsG0080048820.01	blue	0.308451	1
MsG0080048859.01	turquoise	0.182562	1
MsG0080048858.01	yellow	0.670844	1
MsG0080048896.01	blue	0.422985	1
MsG0080048897.01	turquoise	0.717448	1
MsG0080048941.01	black	0.733473	1
MsG0080048978.01	green	0.865688	1
MsG0080048975.01	turquoise	0.634245	1
MsG0080048992.01	blue	0.546601	1
MsG0080049023.01	turquoise	0.928307	1
MsG0080049020.01	brown	0.523426	1
MsG0080049133.01	turquoise	0.831173	1
MsG0080049025.01	yellow	0.626089	1
MsG0080049028.01	blue	0.445744	1
MsG0080049040.01	blue	0.745667	1
MsG0180000075.01	turquoise	0.0435763	1
MsG0180000095.01	turquoise	0.607763	1
MsG0080049077.01	blue	0.551606	1
MsG0080049079.01	blue	0.313999	1
MsG0080048824.01	blue	0.126596	1
MsG0080048838.01	turquoise	0.607208	1
MsG0180000011.01	blue	0.732342	1
MsG0180000051.01	turquoise	0.953679	1
MsG0080048878.01	blue	0.781166	1
MsG0080048888.01	turquoise	0.627224	1
MsG0180000111.01	blue	0.564631	1
MsG0080048925.01	blue	0.481397	1
MsG0180000133.01	turquoise	0.715134	1
MsG0080048944.01	green	0.601453	1
MsG0180000151.01	turquoise	0.786278	1
MsG0080049026.01	yellow	0.41828	1
MsG0080049027.01	yellow	0.723436	1
MsG0080049128.01	turquoise	0.905921	1
MsG0180000024.01	turquoise	0.67613	1
MsG0180000026.01	blue	0.840806	1
MsG0180000030.01	blue	0.743957	1
MsG0180000056.01	turquoise	0.495404	1
MsG0180000059.01	turquoise	0.592773	1
MsG0180000068.01	turquoise	0.716391	1
MsG0180000149.01	blue	0.886973	1
MsG0080048847.01	green	0.388817	1
MsG0080048849.01	turquoise	0.302946	1
MsG0080048890.01	blue	0.873292	1
MsG0080048967.01	turquoise	0.795954	1
MsG0080048977.01	greenyellow	0.728698	1
MsG0080048986.01	blue	0.604744	1
MsG0080049010.01	brown	0.887322	1
MsG0080049066.01	blue	0.899182	1
MsG0080049139.01	blue	0.734538	1
MsG0080049145.01	blue	0.32083	1
MsG0180000019.01	turquoise	0.838693	1
MsG0180000038.01	turquoise	0.431011	1
MsG0180000074.01	blue	0.813137	1
MsG0180000107.01	blue	0.918383	1
MsG0080048829.01	blue	0.411555	1
MsG0080048887.01	green	0.664342	1
MsG0080048917.01	blue	0.76288	1
MsG0080048945.01	blue	0.847199	1
MsG0080049039.01	blue	0.77987	1
MsG0080049051.01	blue	0.880064	1
MsG0080049080.01	blue	0.900288	1
MsG0080049136.01	turquoise	0.923243	1
MsG0080049147.01	brown	0.836568	1
MsG0080049160.01	yellow	0.847961	1
MsG0180000025.01	yellow	0.667202	1
MsG0180000052.01	turquoise	0.897926	1
MsG0180000120.01	blue	0.483079	1
MsG0080048845.01	green	0.810876	1
MsG0080048883.01	blue	0.39892	1
MsG0080048905.01	blue	0.884465	1
MsG0080048912.01	turquoise	0.262459	1
MsG0080048929.01	green	0.591751	1
MsG0080048942.01	blue	0.885752	1
MsG0080048989.01	blue	0.780221	1
MsG0080049042.01	turquoise	0.661113	1
MsG0080049137.01	yellow	0.726462	1
MsG0080049149.01	turquoise	0.939848	1
MsG0080049161.01	blue	0.420606	1
MsG0180000069.01	brown	0.728906	1
MsG0180000088.01	turquoise	0.456345	1
MsG0080048864.01	brown	0.640358	1
MsG0080048924.01	yellow	0.819339	1
MsG0080048963.01	green	0.81661	1
MsG0080048991.01	black	0.4061	1
MsG0080049111.01	blue	0.497431	1
MsG0180000020.01	purple	0.901177	1
MsG0180000040.01	turquoise	0.345019	1
MsG0180000106.01	blue	0.876954	1
MsG0180000121.01	brown	0.562956	1
MsG0180000123.01	turquoise	0.362649	1
MsG0080048830.01	turquoise	0.295314	1
MsG0080048862.01	turquoise	0.322704	1
MsG0080048919.01	turquoise	0.531193	1
MsG0080048947.01	blue	0.273527	1
MsG0080048983.01	turquoise	0.131486	1
MsG0080049018.01	turquoise	0.532255	1
MsG0080049054.01	blue	0.466029	1
MsG0080049073.01	red	0.845316	1
MsG0080049076.01	brown	0.8099	1
MsG0180000023.01	turquoise	0.395061	1
MsG0180000141.01	turquoise	0.0429318	1
MsG0080048969.01	turquoise	0.369475	1
MsG0080049030.01	brown	0.467492	1
MsG0080049058.01	purple	0.892038	1
MsG0080049070.01	blue	0.82909	1
MsG0180000113.01	blue	0.339599	1
MsG0180000131.01	red	0.748356	1
MsG0080048902.01	brown	0.688863	1
MsG0080048982.01	turquoise	0.832014	1
MsG0080049019.01	yellow	0.582555	1
MsG0180000013.01	turquoise	0.501388	1
MsG0180000027.01	brown	0.748685	1
MsG0180000150.01	turquoise	0.311781	1
MsG0180000153.01	turquoise	0.758319	1
MsG0080048915.01	turquoise	0.350436	1
MsG0080049063.01	brown	0.777698	1
MsG0080049159.01	blue	0.748341	1
MsG0180000009.01	turquoise	0.339341	1
MsG0180000102.01	turquoise	0.877471	1
MsG0180000105.01	blue	0.856728	1
MsG0180000126.01	turquoise	0.946666	1
MsG0180000147.01	turquoise	0.856547	1
MsG0080048837.01	turquoise	0.121167	1
MsG0080048918.01	turquoise	0.695048	1
MsG0080048946.01	red	0.462754	1
MsG0080048987.01	green	0.871799	1
MsG0080048990.01	yellow	0.856881	1
MsG0080049024.01	green	0.77117	1
MsG0080049047.01	blue	0.681865	1
MsG0080049102.01	turquoise	0.46527	1
MsG0180000043.01	turquoise	0.730754	1
MsG0080048840.01	turquoise	0.665037	1
MsG0080048923.01	turquoise	0.514833	1
MsG0080048939.01	turquoise	0.899286	1
MsG0080049101.01	turquoise	0.715646	1
MsG0080049130.01	green	0.786966	1
MsG0080049135.01	blue	0.315226	1
MsG0080049150.01	turquoise	0.602189	1
MsG0080049162.01	blue	0.619322	1
MsG0180000028.01	blue	0.858356	1
MsG0180000029.01	turquoise	0.556755	1
MsG0180000036.01	blue	0.919424	1
MsG0180000076.01	blue	0.729938	1
MsG0180000100.01	turquoise	0.743771	1
MsG0080048874.01	turquoise	0.755748	1
MsG0080048877.01	brown	0.887396	1
MsG0080048880.01	blue	0.79524	1
MsG0080048913.01	yellow	0.796759	1
MsG0080048953.01	turquoise	0.540904	1
MsG0080048966.01	blue	0.918273	1
MsG0080049017.01	brown	0.278716	1
MsG0080049034.01	blue	0.553425	1
MsG0080049043.01	turquoise	0.0733504	1
MsG0080049045.01	turquoise	0.641791	1
MsG0080049046.01	turquoise	0.391225	1
MsG0080049127.01	blue	0.414376	1
MsG0180000045.01	turquoise	0.867995	1
MsG0180000064.01	blue	0.138473	1
MsG0180000152.01	blue	0.706745	1
MsG0080048835.01	brown	0.406059	1
MsG0080048865.01	green	0.563595	1
MsG0080048900.01	blue	0.696263	1
MsG0080049004.01	blue	0.916088	1
MsG0080049140.01	blue	0.76646	1
MsG0080048861.01	blue	0.893202	1
MsG0080048892.01	green	0.695894	1
MsG0080048898.01	turquoise	0.497676	1
MsG0180000115.01	blue	0.866054	1
MsG0080048934.01	red	0.29166	1
MsG0180000116.01	turquoise	0.893627	1
MsG0080048940.01	turquoise	0.903821	1
MsG0080048956.01	blue	0.37796	1
MsG0080049009.01	red	0.543975	1
MsG0080049029.01	brown	0.800294	1
MsG0080049048.01	turquoise	0.38534	1
MsG0080049049.01	turquoise	0.838454	1
MsG0080049061.01	pink	0.581422	1
MsG0080049062.01	blue	0.528218	1
MsG0080049078.01	pink	0.73007	1
MsG0180000097.01	blue	0.185382	1
MsG0180000202.01	turquoise	0.258986	1
MsG0180000155.01	blue	0.756418	1
MsG0180000176.01	yellow	0.807639	1
MsG0180000159.01	turquoise	0.940009	1
MsG0180000156.01	red	0.783353	1
MsG0180000182.01	turquoise	0.622166	1
MsG0180000193.01	blue	0.666968	1
MsG0180000243.01	blue	0.431261	1
MsG0180000363.01	turquoise	0.87114	1
MsG0180000383.01	turquoise	0.937116	1
MsG0180000457.01	pink	0.717114	1
MsG0180000500.01	blue	0.501652	1
MsG0180000532.01	yellow	0.588782	1
MsG0180000570.01	turquoise	0.401119	1
MsG0180000627.01	turquoise	0.235628	1
MsG0180000653.01	turquoise	0.849655	1
MsG0180000169.01	blue	0.786913	1
MsG0180000234.01	turquoise	0.972029	1
MsG0180000252.01	turquoise	0.854381	1
MsG0180000260.01	turquoise	0.84525	1
MsG0180000295.01	turquoise	0.557918	1
MsG0180000296.01	turquoise	0.548734	1
MsG0180000407.01	turquoise	0.928122	1
MsG0180000436.01	turquoise	0.964562	1
MsG0180000459.01	turquoise	0.797097	1
MsG0180000590.01	turquoise	0.619517	1
MsG0180000221.01	turquoise	0.984571	1
MsG0180000251.01	turquoise	0.761103	1
MsG0180000255.01	turquoise	0.532325	1
MsG0180000259.01	green	0.624873	1
MsG0180000313.01	turquoise	0.355103	1
MsG0180000360.01	blue	0.822508	1
MsG0180000391.01	turquoise	0.232786	1
MsG0180000438.01	turquoise	0.983402	1
MsG0180000447.01	turquoise	0.769808	1
MsG0180000464.01	turquoise	0.394912	1
MsG0180000474.01	turquoise	0.829758	1
MsG0180000241.01	pink	0.608872	1
MsG0180000267.01	turquoise	0.589625	1
MsG0180000284.01	turquoise	0.949183	1
MsG0180000372.01	turquoise	0.922761	1
MsG0180000382.01	brown	0.769688	1
MsG0180000404.01	blue	0.908665	1
MsG0180000471.01	red	0.827074	1
MsG0180000525.01	purple	0.780195	1
MsG0180000546.01	blue	0.862616	1
MsG0180000598.01	turquoise	0.868747	1
MsG0180000609.01	blue	0.785162	1
MsG0180000634.01	blue	0.465377	1
MsG0180000638.01	green	0.736508	1
MsG0180000177.01	blue	0.319669	1
MsG0180000237.01	turquoise	0.172777	1
MsG0180000184.01	blue	0.777136	1
MsG0180000264.01	blue	0.610557	1
MsG0180000230.01	turquoise	0.553025	1
MsG0180000282.01	blue	0.522351	1
MsG0180000247.01	turquoise	0.862493	1
MsG0180000292.01	blue	0.712222	1
MsG0180000314.01	blue	0.908203	1
MsG0180000351.01	brown	0.814072	1
MsG0180000319.01	turquoise	0.812167	1
MsG0180000353.01	blue	0.807068	1
MsG0180000333.01	turquoise	0.0120753	1
MsG0180000366.01	blue	0.823504	1
MsG0180000334.01	turquoise	0.481572	1
MsG0180000367.01	turquoise	0.936165	1
MsG0180000376.01	turquoise	0.807339	1
MsG0180000232.01	brown	0.509268	1
MsG0180000257.01	turquoise	0.157654	1
MsG0180000443.01	turquoise	0.664471	1
MsG0180000263.01	turquoise	0.42778	1
MsG0180000450.01	turquoise	0.224182	1
MsG0180000308.01	turquoise	0.965258	1
MsG0180000326.01	turquoise	0.737814	1
MsG0180000498.01	yellow	0.735056	1
MsG0180000489.01	turquoise	0.434138	1
MsG0180000386.01	turquoise	0.897051	1
MsG0180000551.01	turquoise	0.584552	1
MsG0180000431.01	blue	0.898276	1
MsG0180000596.01	turquoise	0.673562	1
MsG0180000434.01	turquoise	-0.089088	1
MsG0180000520.01	turquoise	0.0324929	1
MsG0180000599.01	turquoise	0.593152	1
MsG0180000446.01	turquoise	0.250628	1
MsG0180000540.01	brown	0.63692	1
MsG0180000619.01	turquoise	0.916322	1
MsG0180000567.01	turquoise	0.670394	1
MsG0180000582.01	turquoise	0.655754	1
MsG0180000594.01	turquoise	0.964273	1
MsG0180000534.01	blue	0.62581	1
MsG0180000536.01	turquoise	0.883148	1
MsG0180000556.01	brown	0.827828	1
MsG0180000576.01	blue	0.71221	1
MsG0180000589.01	turquoise	0.840089	1
MsG0180000608.01	red	0.856542	1
MsG0180000191.01	turquoise	0.471283	1
MsG0180000174.01	blue	0.429983	1
MsG0180000304.01	turquoise	0.626974	1
MsG0180000200.01	turquoise	0.371687	1
MsG0180000320.01	turquoise	0.338515	1
MsG0180000220.01	turquoise	0.846509	1
MsG0180000272.01	turquoise	0.471423	1
MsG0180000365.01	turquoise	0.826511	1
MsG0180000297.01	turquoise	0.766718	1
MsG0180000395.01	turquoise	0.924534	1
MsG0180000337.01	turquoise	0.810012	1
MsG0180000403.01	blue	0.606902	1
MsG0180000405.01	turquoise	0.724462	1
MsG0180000452.01	turquoise	0.931261	1
MsG0180000456.01	brown	0.21563	1
MsG0180000497.01	turquoise	0.68945	1
MsG0180000466.01	turquoise	0.815678	1
MsG0180000530.01	turquoise	0.830746	1
MsG0180000622.01	yellow	0.532411	1
MsG0180000165.01	blue	0.723457	1
MsG0180000201.01	blue	0.78307	1
MsG0180000275.01	blue	0.931532	1
MsG0180000321.01	turquoise	0.853756	1
MsG0180000340.01	turquoise	0.583127	1
MsG0180000348.01	blue	0.911278	1
MsG0180000592.01	turquoise	0.838933	1
MsG0180000623.01	turquoise	0.627901	1
MsG0180000226.01	turquoise	0.702672	1
MsG0180000305.01	blue	0.288457	1
MsG0180000344.01	turquoise	0.135529	1
MsG0180000354.01	blue	0.482323	1
MsG0180000414.01	turquoise	0.973798	1
MsG0180000437.01	turquoise	0.944467	1
MsG0180000440.01	turquoise	0.951198	1
MsG0180000455.01	blue	0.801557	1
MsG0180000472.01	blue	0.757951	1
MsG0180000538.01	turquoise	0.565136	1
MsG0180000557.01	blue	0.845162	1
MsG0180000595.01	turquoise	0.948425	1
MsG0180000203.01	turquoise	0.562381	1
MsG0180000210.01	turquoise	0.371237	1
MsG0180000246.01	turquoise	0.519541	1
MsG0180000307.01	turquoise	0.955746	1
MsG0180000324.01	yellow	0.762486	1
MsG0180000350.01	blue	0.927286	1
MsG0180000398.01	turquoise	0.160832	1
MsG0180000521.01	red	0.716589	1
MsG0180000600.01	blue	0.904463	1
MsG0180000157.01	turquoise	0.401995	1
MsG0180000197.01	turquoise	0.630629	1
MsG0180000384.01	turquoise	0.772926	1
MsG0180000478.01	pink	0.592641	1
MsG0180000479.01	turquoise	0.865584	1
MsG0180000495.01	turquoise	0.68276	1
MsG0180000549.01	turquoise	0.499487	1
MsG0180000597.01	turquoise	0.956571	1
MsG0180000166.01	turquoise	0.718864	1
MsG0180000189.01	turquoise	0.974305	1
MsG0180000192.01	red	0.908453	1
MsG0180000258.01	turquoise	0.649186	1
MsG0180000399.01	turquoise	0.978076	1
MsG0180000423.01	blue	0.676976	1
MsG0180000427.01	turquoise	0.510757	1
MsG0180000481.01	turquoise	0.359069	1
MsG0180000513.01	turquoise	0.665748	1
MsG0180000553.01	turquoise	0.297538	1
MsG0180000568.01	brown	0.252878	1
MsG0180000604.01	turquoise	0.717608	1
MsG0180000639.01	blue	0.931603	1
MsG0180000249.01	turquoise	0.889798	1
MsG0180000253.01	turquoise	0.57093	1
MsG0180000273.01	turquoise	0.579065	1
MsG0180000289.01	blue	0.906849	1
MsG0180000361.01	blue	0.948749	1
MsG0180000378.01	turquoise	0.728033	1
MsG0180000406.01	blue	0.793659	1
MsG0180000451.01	turquoise	0.418463	1
MsG0180000453.01	turquoise	0.775961	1
MsG0180000475.01	turquoise	0.815041	1
MsG0180000482.01	brown	0.746843	1
MsG0180000503.01	yellow	0.61085	1
MsG0180000552.01	turquoise	0.147969	1
MsG0180000571.01	green	0.756747	1
MsG0180000574.01	blue	0.366641	1
MsG0180000602.01	turquoise	0.483668	1
MsG0180000180.01	blue	0.12652	1
MsG0180000190.01	black	0.44191	1
MsG0180000205.01	red	0.885226	1
MsG0180000223.01	blue	0.547794	1
MsG0180000274.01	brown	0.817505	1
MsG0180000277.01	blue	0.664349	1
MsG0180000290.01	blue	0.854415	1
MsG0180000306.01	green	0.489662	1
MsG0180000355.01	blue	0.676732	1
MsG0180000394.01	turquoise	0.474295	1
MsG0180000491.01	turquoise	0.613442	1
MsG0180000584.01	blue	0.187425	1
MsG0180000629.01	turquoise	0.436232	1
MsG0180000672.01	grey	0.627727	1
MsG0180000663.01	black	0.588421	1
MsG0180000655.01	turquoise	0.859407	1
MsG0180000695.01	red	0.531623	1
MsG0180000685.01	turquoise	0.758578	1
MsG0180000665.01	turquoise	0.761901	1
MsG0180000772.01	green	0.718316	1
MsG0180000875.01	turquoise	0.240738	1
MsG0180000876.01	turquoise	-0.0719633	1
MsG0180000977.01	turquoise	0.62723	1
MsG0180000993.01	turquoise	0.812306	1
MsG0180001048.01	turquoise	0.371076	1
MsG0180001097.01	blue	0.652632	1
MsG0180001115.01	blue	0.785836	1
MsG0180000845.01	blue	0.244647	1
MsG0180000914.01	pink	0.76525	1
MsG0180000957.01	turquoise	0.233716	1
MsG0180000962.01	turquoise	0.600333	1
MsG0180000976.01	turquoise	0.849942	1
MsG0180001023.01	pink	0.683574	1
MsG0180001040.01	blue	0.827415	1
MsG0180001049.01	turquoise	0.67891	1
MsG0180001120.01	turquoise	0.973424	1
MsG0180001122.01	turquoise	0.985618	1
MsG0180001131.01	green	0.655471	1
MsG0180001140.01	blue	0.94193	1
MsG0180001143.01	turquoise	0.169764	1
MsG0180000747.01	green	0.811361	1
MsG0180000785.01	turquoise	0.225982	1
MsG0180000804.01	blue	0.739457	1
MsG0180000819.01	turquoise	0.911817	1
MsG0180000820.01	turquoise	0.0963136	1
MsG0180000889.01	brown	0.569078	1
MsG0180000674.01	yellow	0.521879	1
MsG0180000974.01	black	0.516092	1
MsG0180000676.01	brown	0.750623	1
MsG0180000778.01	blue	0.250117	1
MsG0180000807.01	blue	0.954559	1
MsG0180000833.01	green	0.820783	1
MsG0180001076.01	turquoise	0.720962	1
MsG0180001093.01	brown	0.908353	1
MsG0180000883.01	red	0.726068	1
MsG0180000888.01	turquoise	0.94724	1
MsG0180000929.01	turquoise	0.794835	1
MsG0180000953.01	turquoise	0.892946	1
MsG0180000969.01	turquoise	0.712197	1
MsG0180001006.01	turquoise	0.349717	1
MsG0180001035.01	turquoise	0.647935	1
MsG0180001123.01	turquoise	0.0977405	1
MsG0180000741.01	turquoise	0.880188	1
MsG0180000756.01	turquoise	0.0779716	1
MsG0180000795.01	brown	0.480693	1
MsG0180000867.01	brown	0.441469	1
MsG0180000871.01	turquoise	0.436023	1
MsG0180001002.01	black	0.763254	1
MsG0180001022.01	blue	0.568111	1
MsG0180001027.01	turquoise	0.589424	1
MsG0180001030.01	turquoise	0.725963	1
MsG0180001067.01	turquoise	0.378861	1
MsG0180001073.01	yellow	0.620148	1
MsG0180001079.01	black	0.756632	1
MsG0180001082.01	turquoise	0.645702	1
MsG0180001085.01	blue	0.822813	1
MsG0180001088.01	pink	0.682551	1
MsG0180001148.01	turquoise	0.760225	1
MsG0180000698.01	turquoise	0.606344	1
MsG0180000744.01	turquoise	0.248759	1
MsG0180000752.01	turquoise	0.0753729	1
MsG0180000790.01	brown	0.386411	1
MsG0180000827.01	pink	0.736966	1
MsG0180001055.01	blue	0.851001	1
MsG0180001060.01	blue	0.748521	1
MsG0180000677.01	blue	0.343731	1
MsG0180000694.01	blue	0.635071	1
MsG0180000786.01	turquoise	0.37646	1
MsG0180000793.01	brown	0.595798	1
MsG0180000812.01	pink	0.660682	1
MsG0180000896.01	turquoise	0.374248	1
MsG0180000897.01	turquoise	0.806864	1
MsG0180000965.01	turquoise	0.845298	1
MsG0180000988.01	turquoise	0.803206	1
MsG0180001044.01	blue	0.426833	1
MsG0180001059.01	red	0.482658	1
MsG0180001121.01	turquoise	0.93713	1
MsG0180001124.01	turquoise	0.688087	1
MsG0180001129.01	turquoise	0.734419	1
MsG0180001137.01	green	0.666519	1
MsG0180001139.01	turquoise	0.908663	1
MsG0180000734.01	turquoise	0.608932	1
MsG0180000753.01	turquoise	0.67323	1
MsG0180000791.01	brown	0.70849	1
MsG0180000792.01	brown	0.44974	1
MsG0180000809.01	brown	0.454887	1
MsG0180000846.01	green	0.776708	1
MsG0180000864.01	turquoise	0.867141	1
MsG0180000935.01	turquoise	0.535362	1
MsG0180000980.01	blue	0.901877	1
MsG0180001062.01	turquoise	0.891361	1
MsG0180001094.01	turquoise	0.816166	1
MsG0180001126.01	turquoise	0.766373	1
MsG0180001154.01	turquoise	0.0615121	1
MsG0180000781.01	blue	0.893743	1
MsG0180000787.01	brown	0.83728	1
MsG0180000814.01	turquoise	0.476397	1
MsG0180001004.01	blue	0.609972	1
MsG0180001029.01	turquoise	0.814902	1
MsG0180001084.01	turquoise	0.769477	1
MsG0180001109.01	black	0.523433	1
MsG0180001130.01	turquoise	0.528445	1
MsG0180001138.01	brown	0.888408	1
MsG0180000664.01	pink	0.910574	1
MsG0180000719.01	turquoise	0.800672	1
MsG0180000731.01	turquoise	0.891924	1
MsG0180000739.01	blue	0.222341	1
MsG0180000840.01	yellow	0.558827	1
MsG0180000899.01	turquoise	0.957689	1
MsG0180001042.01	turquoise	0.979553	1
MsG0180001089.01	turquoise	0.445301	1
MsG0180001104.01	blue	0.590308	1
MsG0180000710.01	blue	0.251385	1
MsG0180000762.01	turquoise	0.839004	1
MsG0180000865.01	green	0.357118	1
MsG0180000959.01	turquoise	0.320322	1
MsG0180000983.01	turquoise	-0.0371812	1
MsG0180000999.01	blue	0.605241	1
MsG0180001028.01	yellow	0.763531	1
MsG0180001065.01	turquoise	-0.20647	1
MsG0180001091.01	turquoise	-0.116688	1
MsG0180001150.01	turquoise	0.385045	1
MsG0180000817.01	turquoise	0.141212	1
MsG0180000920.01	turquoise	0.730759	1
MsG0180000942.01	turquoise	0.850284	1
MsG0180000986.01	turquoise	0.724084	1
MsG0180001098.01	blue	0.442643	1
MsG0180000671.01	blue	0.735827	1
MsG0180000718.01	blue	0.587051	1
MsG0180000751.01	turquoise	0.951341	1
MsG0180000797.01	turquoise	0.781761	1
MsG0180000798.01	brown	0.768755	1
MsG0180000934.01	turquoise	0.536405	1
MsG0180000949.01	turquoise	0.641483	1
MsG0180000979.01	blue	0.363159	1
MsG0180001144.01	yellow	0.865595	1
MsG0180001153.01	red	0.740911	1
MsG0180000774.01	yellow	0.645316	1
MsG0180000782.01	brown	0.569177	1
MsG0180000818.01	turquoise	0.0232552	1
MsG0180000824.01	brown	0.7941	1
MsG0180000844.01	turquoise	0.937917	1
MsG0180000854.01	turquoise	0.952211	1
MsG0180000866.01	yellow	0.463338	1
MsG0180000687.01	blue	0.871434	1
MsG0180000885.01	turquoise	0.354892	1
MsG0180000728.01	turquoise	0.794844	1
MsG0180000729.01	turquoise	0.7145	1
MsG0180000730.01	brown	0.644683	1
MsG0180000996.01	blue	0.738598	1
MsG0180000775.01	brown	0.47483	1
MsG0180000794.01	turquoise	0.559478	1
MsG0180001053.01	turquoise	0.914336	1
MsG0180000823.01	turquoise	0.782899	1
MsG0180001095.01	turquoise	0.870418	1
MsG0180001125.01	turquoise	0.627445	1
MsG0180001050.01	turquoise	0.756772	1
MsG0180001057.01	red	0.781437	1
MsG0180001061.01	turquoise	0.0327521	1
MsG0180001075.01	turquoise	0.830707	1
MsG0180001099.01	pink	0.728966	1
MsG0180001135.01	turquoise	0.396487	1
MsG0180000722.01	turquoise	0.434223	1
MsG0180000784.01	turquoise	0.133157	1
MsG0180000822.01	turquoise	0.596286	1
MsG0180000930.01	turquoise	0.950774	1
MsG0180000936.01	turquoise	0.83619	1
MsG0180001034.01	yellow	0.829958	1
MsG0180001054.01	turquoise	0.759431	1
MsG0180001108.01	turquoise	0.923534	1
MsG0180001149.01	turquoise	0.724508	1
MsG0180001168.01	yellow	0.768964	1
MsG0180001170.01	brown	0.53894	1
MsG0180001176.01	brown	0.640651	1
MsG0180001183.01	red	0.822612	1
MsG0180001186.01	blue	0.434607	1
MsG0180001203.01	red	0.894254	1
MsG0180001253.01	turquoise	0.505568	1
MsG0180001355.01	turquoise	0.721634	1
MsG0180001371.01	blue	0.633545	1
MsG0180001264.01	turquoise	0.920897	1
MsG0180001469.01	turquoise	0.477871	1
MsG0180001275.01	turquoise	0.641811	1
MsG0180001489.01	turquoise	0.320886	1
MsG0180001546.01	yellow	0.606134	1
MsG0180001610.01	green	0.808776	1
MsG0180001405.01	turquoise	0.727634	1
MsG0180001442.01	turquoise	0.778859	1
MsG0180001466.01	turquoise	0.922842	1
MsG0180001470.01	turquoise	0.451416	1
MsG0180001577.01	blue	0.910049	1
MsG0180001594.01	turquoise	0.507144	1
MsG0180001257.01	blue	0.346565	1
MsG0180001263.01	turquoise	0.940999	1
MsG0180001291.01	blue	0.677489	1
MsG0180001293.01	blue	0.695133	1
MsG0180001352.01	turquoise	0.310924	1
MsG0180001468.01	turquoise	0.1055	1
MsG0180001471.01	brown	0.822291	1
MsG0180001474.01	turquoise	0.459431	1
MsG0180001553.01	black	0.647899	1
MsG0180001575.01	brown	0.390575	1
MsG0180001639.01	blue	0.926225	1
MsG0180001649.01	turquoise	0.480915	1
MsG0180001164.01	brown	0.835179	1
MsG0180001315.01	blue	0.5332	1
MsG0180001364.01	brown	0.757172	1
MsG0180001378.01	turquoise	0.495133	1
MsG0180001552.01	brown	0.705397	1
MsG0180001259.01	brown	0.641839	1
MsG0180001277.01	turquoise	0.336683	1
MsG0180001283.01	blue	0.720183	1
MsG0180001453.01	turquoise	0.944679	1
MsG0180001548.01	blue	0.452482	1
MsG0180001554.01	blue	0.187174	1
MsG0180001276.01	turquoise	0.598517	1
MsG0180001286.01	brown	0.698668	1
MsG0180001314.01	yellow	0.861761	1
MsG0180001538.01	blue	0.723738	1
MsG0180001573.01	blue	0.508876	1
MsG0180001585.01	yellow	0.596788	1
MsG0180001588.01	blue	0.873396	1
MsG0180001611.01	blue	0.674143	1
MsG0180001271.01	turquoise	0.815056	1
MsG0180001409.01	turquoise	0.769941	1
MsG0180001446.01	turquoise	0.31666	1
MsG0180001499.01	turquoise	0.810353	1
MsG0180001523.01	turquoise	0.425998	1
MsG0180001247.01	blue	0.276094	1
MsG0180001321.01	pink	0.430099	1
MsG0180001324.01	black	0.716664	1
MsG0180001357.01	brown	0.662039	1
MsG0180001435.01	turquoise	0.96042	1
MsG0180001457.01	turquoise	0.706983	1
MsG0180001475.01	turquoise	0.760421	1
MsG0180001501.01	turquoise	0.293018	1
MsG0180001172.01	yellow	0.635421	1
MsG0180001393.01	turquoise	0.912897	1
MsG0180001403.01	turquoise	0.859962	1
MsG0180001451.01	green	0.733883	1
MsG0180001452.01	turquoise	0.87386	1
MsG0180001507.01	blue	0.861502	1
MsG0180001177.01	turquoise	0.265584	1
MsG0180001615.01	turquoise	0.954505	1
MsG0180001178.01	turquoise	0.625769	1
MsG0180001258.01	turquoise	0.912066	1
MsG0180001279.01	turquoise	0.424673	1
MsG0180001280.01	pink	0.681861	1
MsG0180001373.01	turquoise	0.679755	1
MsG0180001459.01	turquoise	0.805048	1
MsG0180001481.01	blue	0.395159	1
MsG0180001484.01	turquoise	0.245092	1
MsG0180001282.01	turquoise	0.318107	1
MsG0180001311.01	turquoise	0.611127	1
MsG0180001334.01	blue	0.436928	1
MsG0180001500.01	blue	0.497548	1
MsG0180001534.01	turquoise	0.725555	1
MsG0180001544.01	yellow	0.569395	1
MsG0180001598.01	green	0.481638	1
MsG0180001175.01	blue	0.91657	1
MsG0180001303.01	blue	0.0878667	1
MsG0180001318.01	blue	0.553892	1
MsG0180001402.01	turquoise	0.291628	1
MsG0180001476.01	blue	0.030875	1
MsG0180001524.01	turquoise	0.73423	1
MsG0180001621.01	turquoise	0.314675	1
MsG0180001191.01	pink	0.796804	1
MsG0180001244.01	blue	0.336779	1
MsG0180001412.01	turquoise	0.382477	1
MsG0180001365.01	turquoise	0.390915	1
MsG0180001381.01	blue	0.227225	1
MsG0180001398.01	blue	0.847636	1
MsG0180001463.01	turquoise	0.941035	1
MsG0180001492.01	turquoise	0.0644079	1
MsG0180001179.01	turquoise	0.171441	1
MsG0180001207.01	blue	0.782	1
MsG0180001231.01	blue	0.645153	1
MsG0180001329.01	blue	0.675803	1
MsG0180001361.01	blue	0.37896	1
MsG0180001367.01	black	0.584778	1
MsG0180001472.01	black	0.446157	1
MsG0180001480.01	blue	0.751863	1
MsG0180001522.01	blue	0.616677	1
MsG0180001539.01	turquoise	0.212615	1
MsG0180001233.01	turquoise	-0.15512	1
MsG0180001399.01	turquoise	-0.0837287	1
MsG0180001443.01	turquoise	0.673528	1
MsG0180001601.01	blue	0.633547	1
MsG0180001660.01	turquoise	0.488882	1
MsG0180001658.01	blue	0.446359	1
MsG0180001655.01	red	0.27585	1
MsG0180001663.01	turquoise	0.852166	1
MsG0180001732.01	blue	0.532265	1
MsG0180001857.01	blue	0.346633	1
MsG0180001922.01	turquoise	0.735521	1
MsG0180001989.01	black	0.77022	1
MsG0180002025.01	turquoise	0.465787	1
MsG0180002067.01	turquoise	0.0801642	1
MsG0180001836.01	magenta	0.615677	1
MsG0180001867.01	turquoise	0.783317	1
MsG0180001915.01	turquoise	0.391225	1
MsG0180001998.01	green	0.664065	1
MsG0180001803.01	turquoise	0.516564	1
MsG0180001842.01	turquoise	0.863216	1
MsG0180001883.01	turquoise	0.429689	1
MsG0180001884.01	black	0.824368	1
MsG0180001937.01	turquoise	0.482909	1
MsG0180001991.01	red	0.768311	1
MsG0180001712.01	turquoise	0.938355	1
MsG0180001719.01	blue	0.797168	1
MsG0180001721.01	turquoise	0.366995	1
MsG0180001771.01	blue	0.726939	1
MsG0180001801.01	turquoise	0.731352	1
MsG0180001873.01	yellow	0.879758	1
MsG0180001919.01	blue	0.551606	1
MsG0180001939.01	blue	0.445915	1
MsG0180001990.01	blue	0.323468	1
MsG0180002006.01	turquoise	0.891536	1
MsG0180002042.01	blue	0.924598	1
MsG0180002135.01	red	0.553251	1
MsG0180001722.01	blue	0.411338	1
MsG0180001917.01	brown	0.349827	1
MsG0180001921.01	turquoise	0.956599	1
MsG0180001926.01	black	0.820528	1
MsG0180001927.01	blue	0.576105	1
MsG0180001995.01	turquoise	0.155207	1
MsG0180002136.01	turquoise	0.905548	1
MsG0180002138.01	turquoise	0.860704	1
MsG0180001685.01	turquoise	0.51181	1
MsG0180001717.01	brown	0.414277	1
MsG0180001772.01	blue	0.492413	1
MsG0180001664.01	blue	0.896989	1
MsG0180001925.01	turquoise	0.733662	1
MsG0180001938.01	turquoise	0.842779	1
MsG0180001972.01	turquoise	0.0863095	1
MsG0180001977.01	brown	0.614457	1
MsG0180001786.01	red	0.77815	1
MsG0180001804.01	turquoise	0.94954	1
MsG0180001868.01	turquoise	0.875464	1
MsG0180001928.01	blue	0.917285	1
MsG0180001934.01	turquoise	0.35953	1
MsG0180002007.01	turquoise	0.820897	1
MsG0180002019.01	green	0.587274	1
MsG0180001689.01	blue	0.781976	1
MsG0180001827.01	turquoise	0.401621	1
MsG0180001834.01	turquoise	0.766795	1
MsG0180001886.01	turquoise	0.564917	1
MsG0180001935.01	grey	0.721582	1
MsG0180002024.01	blue	0.51217	1
MsG0180002098.01	brown	0.79825	1
MsG0180001841.01	turquoise	0.430944	1
MsG0180001859.01	blue	0.57729	1
MsG0180001864.01	turquoise	0.155396	1
MsG0180002090.01	turquoise	0.592694	1
MsG0180001728.01	turquoise	0.610869	1
MsG0180001916.01	turquoise	0.251267	1
MsG0180001993.01	blue	0.464883	1
MsG0180002068.01	turquoise	0.772717	1
MsG0180001690.01	turquoise	0.385419	1
MsG0180001795.01	turquoise	0.0394006	1
MsG0180001828.01	blue	0.873392	1
MsG0180001929.01	blue	0.425994	1
MsG0180001944.01	turquoise	0.40719	1
MsG0180002088.01	turquoise	0.746301	1
MsG0180001718.01	brown	0.598054	1
MsG0180001720.01	turquoise	0.922285	1
MsG0180001799.01	turquoise	-0.470888	1
MsG0180001802.01	turquoise	0.662346	1
MsG0180001888.01	turquoise	0.649464	1
MsG0180001892.01	blue	0.733702	1
MsG0180001933.01	turquoise	0.697062	1
MsG0180002083.01	turquoise	0.782786	1
MsG0180001776.01	brown	0.228716	1
MsG0180001785.01	turquoise	0.928318	1
MsG0180001807.01	turquoise	0.306301	1
MsG0180001840.01	brown	0.575973	1
MsG0180001854.01	brown	0.689543	1
MsG0180001913.01	turquoise	-0.0921987	1
MsG0180001978.01	turquoise	0.186087	1
MsG0180002077.01	turquoise	0.160794	1
MsG0180002086.01	turquoise	0.517804	1
MsG0180001656.01	pink	0.443497	1
MsG0180001775.01	turquoise	0.88428	1
MsG0180001940.01	turquoise	0.773924	1
MsG0180002050.01	blue	0.433562	1
MsG0180002085.01	turquoise	0.755544	1
MsG0180002189.01	brown	0.634604	1
MsG0180002221.01	yellow	0.667421	1
MsG0180002229.01	turquoise	0.5381	1
MsG0180002272.01	turquoise	0.656331	1
MsG0180002314.01	red	0.949917	1
MsG0180002324.01	turquoise	0.764866	1
MsG0180002404.01	blue	0.789092	1
MsG0180002546.01	green	0.836044	1
MsG0180002237.01	turquoise	0.628059	1
MsG0180002398.01	blue	0.704011	1
MsG0180002433.01	blue	0.339892	1
MsG0180002477.01	turquoise	0.150232	1
MsG0180002556.01	brown	0.810845	1
MsG0180002183.01	turquoise	0.863301	1
MsG0180002187.01	turquoise	0.650747	1
MsG0180002319.01	greenyellow	0.813566	1
MsG0180002362.01	turquoise	0.350665	1
MsG0180002451.01	turquoise	0.677512	1
MsG0180002211.01	blue	0.436603	1
MsG0180002271.01	turquoise	0.344116	1
MsG0180002361.01	turquoise	0.102196	1
MsG0180002514.01	blue	0.913607	1
MsG0180002524.01	turquoise	0.830256	1
MsG0180002585.01	turquoise	0.907012	1
MsG0180002227.01	blue	0.721754	1
MsG0180002278.01	green	0.591569	1
MsG0180002251.01	turquoise	0.274622	1
MsG0180002365.01	brown	0.691377	1
MsG0180002458.01	yellow	0.732184	1
MsG0180002185.01	turquoise	-0.140727	1
MsG0180002217.01	blue	0.554485	1
MsG0180002222.01	black	0.861155	1
MsG0180002248.01	turquoise	0.254112	1
MsG0180002349.01	red	0.741001	1
MsG0180002409.01	blue	0.87088	1
MsG0180002428.01	blue	0.37807	1
MsG0180002429.01	blue	0.0486329	1
MsG0180002454.01	greenyellow	0.772967	1
MsG0180002459.01	turquoise	0.582057	1
MsG0180002255.01	turquoise	0.847024	1
MsG0180002335.01	turquoise	0.519995	1
MsG0180002425.01	blue	0.588667	1
MsG0180002439.01	blue	0.833704	1
MsG0180002472.01	turquoise	0.818203	1
MsG0180002506.01	blue	0.287616	1
MsG0180002208.01	turquoise	0.232426	1
MsG0180002214.01	blue	0.6902	1
MsG0180002298.01	turquoise	0.826587	1
MsG0180002238.01	turquoise	0.636306	1
MsG0180002247.01	turquoise	0.891744	1
MsG0180002270.01	turquoise	0.363811	1
MsG0180002322.01	turquoise	0.829581	1
MsG0180002325.01	turquoise	0.620467	1
MsG0180002199.01	blue	0.783576	1
MsG0180002232.01	turquoise	0.880982	1
MsG0180002418.01	red	0.502768	1
MsG0180002482.01	blue	0.51429	1
MsG0180002583.01	blue	0.330668	1
MsG0180002249.01	turquoise	0.717897	1
MsG0180002273.01	turquoise	0.588068	1
MsG0180002463.01	turquoise	0.577162	1
MsG0180002417.01	pink	0.65736	1
MsG0180002649.01	black	0.757277	1
MsG0180002501.01	turquoise	0.269702	1
MsG0180002209.01	green	0.897952	1
MsG0180002302.01	red	0.539056	1
MsG0180002316.01	turquoise	0.784712	1
MsG0180002453.01	blue	0.696411	1
MsG0180002545.01	blue	0.750678	1
MsG0180002182.01	turquoise	0.680535	1
MsG0180002326.01	brown	0.580857	1
MsG0180002397.01	blue	0.736397	1
MsG0180002207.01	yellow	0.560886	1
MsG0180002210.01	turquoise	0.583826	1
MsG0180002218.01	blue	0.586517	1
MsG0180002250.01	turquoise	0.627101	1
MsG0180002441.01	brown	0.323937	1
MsG0180002381.01	turquoise	0.264599	1
MsG0180002399.01	turquoise	0.708578	1
MsG0180002421.01	blue	0.234717	1
MsG0180002424.01	red	0.87389	1
MsG0180002438.01	blue	0.929903	1
MsG0180002492.01	blue	0.27417	1
MsG0180002502.01	brown	0.617557	1
MsG0180002523.01	turquoise	0.0875861	1
MsG0180002534.01	blue	0.166333	1
MsG0180002668.01	blue	0.535808	1
MsG0180002670.01	turquoise	0.275725	1
MsG0180002669.01	blue	0.150973	1
MsG0180002665.01	blue	0.612501	1
MsG0180002700.01	brown	0.883384	1
MsG0180002715.01	brown	0.761913	1
MsG0180002984.01	blue	0.67352	1
MsG0180002709.01	turquoise	0.466321	1
MsG0180002891.01	turquoise	0.9365	1
MsG0180002897.01	green	0.421348	1
MsG0180002900.01	blue	0.874775	1
MsG0180002935.01	turquoise	0.936806	1
MsG0180002737.01	turquoise	0.614437	1
MsG0180002842.01	brown	0.757378	1
MsG0180002857.01	black	0.81955	1
MsG0180002869.01	turquoise	0.408189	1
MsG0180002902.01	blue	0.744139	1
MsG0180002936.01	blue	0.813201	1
MsG0180002694.01	blue	0.50211	1
MsG0180002955.01	turquoise	0.594596	1
MsG0180002800.01	blue	0.613029	1
MsG0180003062.01	turquoise	0.75681	1
MsG0180002906.01	turquoise	0.594466	1
MsG0180003150.01	turquoise	0.538073	1
MsG0180003029.01	blue	0.696722	1
MsG0180003130.01	turquoise	0.977424	1
MsG0180003145.01	brown	0.442558	1
MsG0180002749.01	brown	0.253788	1
MsG0180002796.01	turquoise	0.628884	1
MsG0180003020.01	turquoise	0.339454	1
MsG0180003093.01	green	0.389376	1
MsG0180003094.01	blue	0.565127	1
MsG0180003116.01	brown	0.581655	1
MsG0180003146.01	blue	0.722504	1
MsG0180002720.01	blue	0.265929	1
MsG0180002812.01	yellow	0.646393	1
MsG0180002838.01	blue	0.364004	1
MsG0180003057.01	turquoise	-0.0611272	1
MsG0180003128.01	turquoise	0.100754	1
MsG0180002678.01	yellow	0.406138	1
MsG0180002808.01	turquoise	0.926291	1
MsG0180002672.01	grey	0.117321	1
MsG0180002830.01	turquoise	0.562487	1
MsG0180002865.01	brown	0.757669	1
MsG0180002716.01	blue	0.226125	1
MsG0180002911.01	turquoise	0.835202	1
MsG0180002993.01	yellow	0.565029	1
MsG0180003028.01	turquoise	0.258422	1
MsG0180002894.01	turquoise	0.883385	1
MsG0180002971.01	turquoise	0.903165	1
MsG0180003115.01	yellow	0.616487	1
MsG0180003079.01	turquoise	0.115968	1
MsG0180003080.01	turquoise	0.0864356	1
MsG0180003032.01	brown	0.503023	1
MsG0180003036.01	turquoise	0.107384	1
MsG0180003129.01	turquoise	0.0478216	1
MsG0180003010.01	brown	0.277861	1
MsG0180003018.01	red	0.707451	1
MsG0180002666.01	blue	0.381096	1
MsG0180003102.01	turquoise	0.69912	1
MsG0180002733.01	turquoise	0.507846	1
MsG0180003107.01	turquoise	0.711523	1
MsG0180002883.01	turquoise	0.476627	1
MsG0180002912.01	turquoise	0.928696	1
MsG0180002929.01	black	0.546296	1
MsG0180003030.01	turquoise	0.442498	1
MsG0180003051.01	turquoise	0.0666699	1
MsG0180003097.01	red	0.542565	1
MsG0180003124.01	blue	0.665448	1
MsG0180003142.01	grey	-0.173519	1
MsG0180002901.01	blue	0.667928	1
MsG0180003083.01	blue	0.644573	1
MsG0180002746.01	brown	0.613719	1
MsG0180002809.01	green	0.845831	1
MsG0180002811.01	yellow	0.71701	1
MsG0180002895.01	red	0.850641	1
MsG0180002924.01	turquoise	0.566406	1
MsG0180002978.01	blue	0.852166	1
MsG0180003033.01	blue	0.439785	1
MsG0180003041.01	pink	0.672638	1
MsG0180003068.01	yellow	0.396124	1
MsG0180002679.01	yellow	0.777261	1
MsG0180002908.01	blue	0.72956	1
MsG0180003065.01	turquoise	0.621218	1
MsG0180003114.01	blue	0.350679	1
MsG0180003163.01	turquoise	0.252998	1
MsG0180003161.01	blue	0.356628	1
MsG0180003182.01	yellow	0.295299	1
MsG0180003168.01	turquoise	0.233346	1
MsG0180003155.01	turquoise	0.47113	1
MsG0180003157.01	turquoise	0.919633	1
MsG0180003241.01	turquoise	0.675786	1
MsG0180003248.01	turquoise	0.7455	1
MsG0180003296.01	blue	0.77518	1
MsG0180003375.01	turquoise	0.892731	1
MsG0180003410.01	turquoise	0.90934	1
MsG0180003446.01	red	0.730842	1
MsG0180003510.01	turquoise	0.942484	1
MsG0180003548.01	blue	0.913663	1
MsG0180003592.01	turquoise	0.163339	1
MsG0180003595.01	turquoise	0.333324	1
MsG0180003243.01	turquoise	0.670987	1
MsG0180003254.01	turquoise	0.453572	1
MsG0180003256.01	blue	0.556703	1
MsG0180003316.01	turquoise	0.749221	1
MsG0180003350.01	pink	0.884415	1
MsG0180003371.01	turquoise	0.0490367	1
MsG0180003383.01	blue	0.73213	1
MsG0180003403.01	blue	0.909395	1
MsG0180003435.01	blue	0.680781	1
MsG0180003494.01	blue	0.772166	1
MsG0180003495.01	turquoise	-0.12748	1
MsG0180003503.01	turquoise	0.727204	1
MsG0180003532.01	green	0.720695	1
MsG0180003568.01	turquoise	0.27894	1
MsG0180003189.01	turquoise	0.575177	1
MsG0180003240.01	turquoise	0.928971	1
MsG0180003347.01	turquoise	0.107287	1
MsG0180003358.01	turquoise	0.303118	1
MsG0180003421.01	pink	0.852216	1
MsG0180003423.01	turquoise	0.925953	1
MsG0180003512.01	red	0.715007	1
MsG0180003523.01	turquoise	0.599989	1
MsG0180003564.01	blue	0.610384	1
MsG0180003633.01	blue	0.707033	1
MsG0180003235.01	blue	0.607072	1
MsG0180003282.01	blue	0.29926	1
MsG0180003391.01	blue	0.849712	1
MsG0180003404.01	turquoise	0.645894	1
MsG0180003416.01	blue	0.549227	1
MsG0180003467.01	green	0.878257	1
MsG0180003497.01	blue	0.56799	1
MsG0180003534.01	turquoise	0.975137	1
MsG0180003611.01	turquoise	0.855851	1
MsG0180003317.01	turquoise	0.951286	1
MsG0180003405.01	brown	0.183009	1
MsG0180003450.01	blue	0.294184	1
MsG0180003464.01	turquoise	0.820255	1
MsG0180003483.01	turquoise	0.814098	1
MsG0180003538.01	blue	0.5819	1
MsG0180003591.01	blue	0.23606	1
MsG0180003298.01	yellow	0.682666	1
MsG0180003484.01	turquoise	0.516172	1
MsG0180003525.01	blue	0.522666	1
MsG0180003601.01	turquoise	0.583687	1
MsG0180003617.01	brown	0.764561	1
MsG0180003275.01	turquoise	0.708627	1
MsG0180003294.01	turquoise	0.914979	1
MsG0180003322.01	turquoise	0.166255	1
MsG0180003572.01	brown	0.601304	1
MsG0180003252.01	turquoise	0.939407	1
MsG0180003370.01	yellow	0.438226	1
MsG0180003482.01	turquoise	0.465032	1
MsG0180003505.01	brown	0.538907	1
MsG0180003539.01	turquoise	0.361086	1
MsG0180003612.01	yellow	0.800634	1
MsG0180003619.01	turquoise	0.798846	1
MsG0180003249.01	turquoise	0.813569	1
MsG0180003345.01	turquoise	0.394145	1
MsG0180003442.01	green	0.404303	1
MsG0180003496.01	blue	0.0553379	1
MsG0180003533.01	turquoise	0.991646	1
MsG0180003582.01	blue	0.448627	1
MsG0180003622.01	blue	0.875994	1
MsG0180003253.01	turquoise	0.89607	1
MsG0180003281.01	turquoise	0.209991	1
MsG0180003377.01	turquoise	0.312689	1
MsG0180003451.01	blue	0.493724	1
MsG0180003586.01	blue	0.244445	1
MsG0180003620.01	turquoise	0.299096	1
MsG0180003292.01	brown	0.275345	1
MsG0180003336.01	blue	0.484881	1
MsG0180003351.01	green	0.626494	1
MsG0180003411.01	turquoise	0.724689	1
MsG0180003430.01	yellow	0.679118	1
MsG0180003477.01	turquoise	0.121672	1
MsG0180003504.01	turquoise	0.140071	1
MsG0180003566.01	brown	0.183183	1
MsG0180003194.01	turquoise	0.283115	1
MsG0180003237.01	yellow	0.556001	1
MsG0180003193.01	turquoise	0.702385	1
MsG0180003264.01	turquoise	0.795777	1
MsG0180003304.01	turquoise	0.330151	1
MsG0180003332.01	blue	0.577509	1
MsG0180003346.01	turquoise	0.460759	1
MsG0180003352.01	turquoise	0.579987	1
MsG0180003413.01	turquoise	0.438145	1
MsG0180003453.01	green	0.939828	1
MsG0180003462.01	turquoise	0.940825	1
MsG0180003517.01	blue	0.0394269	1
MsG0180003526.01	blue	0.399493	1
MsG0180003531.01	blue	0.431514	1
MsG0180003542.01	turquoise	0.923464	1
MsG0180003634.01	turquoise	0.868001	1
MsG0180003590.01	turquoise	0.904204	1
MsG0180003649.01	turquoise	0.391861	1
MsG0180003173.01	red	0.537103	1
MsG0180003198.01	turquoise	0.734246	1
MsG0180003268.01	blue	0.729149	1
MsG0180003178.01	turquoise	0.137158	1
MsG0180003353.01	green	0.571624	1
MsG0180003363.01	yellow	0.54158	1
MsG0180003190.01	turquoise	0.840676	1
MsG0180003392.01	green	0.591009	1
MsG0180003207.01	turquoise	0.923427	1
MsG0180003443.01	blue	0.577748	1
MsG0180003578.01	turquoise	0.828484	1
MsG0180003599.01	blue	0.707141	1
MsG0180003428.01	red	0.75775	1
MsG0180003493.01	blue	0.947817	1
MsG0180003498.01	blue	0.658518	1
MsG0180003499.01	blue	0.798718	1
MsG0180003547.01	blue	0.564985	1
MsG0180003602.01	turquoise	0.343518	1
MsG0180003174.01	red	0.541939	1
MsG0180003175.01	brown	0.424469	1
MsG0180003314.01	blue	0.645305	1
MsG0180003329.01	pink	0.490183	1
MsG0180003338.01	turquoise	0.823282	1
MsG0180003361.01	blue	0.58733	1
MsG0180003470.01	turquoise	0.912275	1
MsG0180003485.01	blue	0.433965	1
MsG0180003524.01	blue	-0.128391	1
MsG0180003594.01	turquoise	0.885729	1
MsG0180003606.01	blue	0.678888	1
MsG0180003688.01	turquoise	0.00172096	1
MsG0180003690.01	pink	0.375021	1
MsG0180003658.01	turquoise	-0.356852	1
MsG0180003762.01	black	0.655195	1
MsG0180003768.01	turquoise	-0.231835	1
MsG0180003879.01	turquoise	0.870623	1
MsG0180003886.01	yellow	0.777148	1
MsG0180004091.01	blue	0.619285	1
MsG0180004106.01	turquoise	0.893952	1
MsG0180003953.01	blue	0.871217	1
MsG0180003982.01	yellow	0.646985	1
MsG0180004029.01	turquoise	0.785221	1
MsG0180004124.01	turquoise	0.708283	1
MsG0180004146.01	turquoise	0.519605	1
MsG0180004151.01	yellow	0.82269	1
MsG0180003710.01	turquoise	0.497458	1
MsG0180003758.01	blue	0.420858	1
MsG0180003810.01	turquoise	0.640396	1
MsG0180003830.01	turquoise	0.847779	1
MsG0180003905.01	blue	0.746614	1
MsG0180003956.01	turquoise	0.717831	1
MsG0180004010.01	blue	0.729034	1
MsG0180004026.01	turquoise	0.398493	1
MsG0180004070.01	turquoise	0.634605	1
MsG0180004143.01	blue	0.444198	1
MsG0180003695.01	blue	0.945269	1
MsG0180003779.01	blue	0.636477	1
MsG0180003869.01	turquoise	0.247613	1
MsG0180003921.01	blue	0.757486	1
MsG0180003939.01	turquoise	0.882425	1
MsG0180003978.01	brown	0.648431	1
MsG0180004006.01	blue	0.708441	1
MsG0180004013.01	turquoise	0.18194	1
MsG0180004025.01	red	0.553168	1
MsG0180004099.01	turquoise	-0.113147	1
MsG0180004121.01	turquoise	0.89183	1
MsG0180003670.01	turquoise	0.717994	1
MsG0180003815.01	yellow	0.765477	1
MsG0180003848.01	turquoise	0.301669	1
MsG0180003849.01	turquoise	0.416108	1
MsG0180003913.01	turquoise	-0.00727051	1
MsG0180004000.01	turquoise	0.27643	1
MsG0180004088.01	blue	0.447419	1
MsG0180004102.01	blue	0.712269	1
MsG0180004114.01	black	0.919177	1
MsG0180003752.01	yellow	0.72232	1
MsG0180003780.01	blue	0.826925	1
MsG0180003805.01	blue	0.23505	1
MsG0180003862.01	pink	0.892251	1
MsG0180003948.01	turquoise	0.894555	1
MsG0180003990.01	turquoise	0.444395	1
MsG0180003992.01	turquoise	0.76433	1
MsG0180004067.01	turquoise	0.899519	1
MsG0180004068.01	turquoise	0.684354	1
MsG0180004104.01	turquoise	0.900345	1
MsG0180004110.01	turquoise	0.804383	1
MsG0180004152.01	blue	0.0431447	1
MsG0180003672.01	turquoise	0.574954	1
MsG0180003707.01	turquoise	0.752273	1
MsG0180003765.01	turquoise	0.049402	1
MsG0180003785.01	turquoise	0.284367	1
MsG0180003792.01	turquoise	0.811944	1
MsG0180004017.01	green	0.904419	1
MsG0180003726.01	blue	0.221277	1
MsG0180004020.01	turquoise	0.59176	1
MsG0180003728.01	brown	0.821523	1
MsG0180004063.01	black	0.563347	1
MsG0180003776.01	turquoise	0.569166	1
MsG0180004108.01	turquoise	0.731972	1
MsG0180003800.01	blue	0.724967	1
MsG0180003850.01	turquoise	0.785657	1
MsG0180003859.01	turquoise	0.610817	1
MsG0180003880.01	turquoise	0.0370654	1
MsG0180003940.01	turquoise	0.626257	1
MsG0180003943.01	blue	0.82867	1
MsG0180003954.01	black	0.623977	1
MsG0180003965.01	turquoise	0.265212	1
MsG0180003993.01	turquoise	0.737029	1
MsG0180004045.01	blue	0.337322	1
MsG0180004061.01	turquoise	0.187923	1
MsG0180004094.01	yellow	0.702692	1
MsG0180004115.01	blue	0.572117	1
MsG0180003753.01	turquoise	0.865023	1
MsG0180003820.01	blue	0.844255	1
MsG0180003876.01	turquoise	0.936274	1
MsG0180003944.01	brown	0.684564	1
MsG0180004095.01	blue	0.222931	1
MsG0180004126.01	blue	0.443232	1
MsG0180003697.01	green	0.482655	1
MsG0180003719.01	red	0.666914	1
MsG0180003746.01	brown	0.592743	1
MsG0180003772.01	turquoise	0.260813	1
MsG0180003802.01	blue	0.674795	1
MsG0180003686.01	turquoise	0.818416	1
MsG0180003900.01	blue	0.316629	1
MsG0180003793.01	yellow	0.81478	1
MsG0180003808.01	turquoise	0.653927	1
MsG0180004018.01	blue	0.899464	1
MsG0180004051.01	yellow	0.596926	1
MsG0180003856.01	turquoise	0.920765	1
MsG0180004053.01	turquoise	0.905735	1
MsG0180003865.01	brown	0.427092	1
MsG0180004065.01	magenta	0.829254	1
MsG0180004087.01	turquoise	0.811458	1
MsG0180004116.01	green	0.436191	1
MsG0180004154.01	blue	0.554753	1
MsG0180003985.01	green	0.696908	1
MsG0180004012.01	blue	0.377851	1
MsG0180004028.01	blue	0.913778	1
MsG0180004044.01	pink	0.791809	1
MsG0180004057.01	brown	0.805435	1
MsG0180004058.01	brown	0.826685	1
MsG0180004120.01	blue	0.685366	1
MsG0180003656.01	blue	0.971963	1
MsG0180003673.01	turquoise	0.525888	1
MsG0180003698.01	red	0.42278	1
MsG0180003784.01	turquoise	-0.518992	1
MsG0180003796.01	turquoise	-0.497662	1
MsG0180003989.01	blue	0.5541	1
MsG0180003699.01	yellow	0.448635	1
MsG0180004009.01	blue	0.723019	1
MsG0180003741.01	blue	0.919906	1
MsG0180004021.01	turquoise	0.597716	1
MsG0180004027.01	blue	0.809498	1
MsG0180003791.01	blue	0.660384	1
MsG0180003872.01	turquoise	0.592226	1
MsG0180004056.01	brown	0.761066	1
MsG0180003874.01	turquoise	0.971168	1
MsG0180003912.01	green	0.634138	1
MsG0180004090.01	green	0.817329	1
MsG0180003945.01	blue	0.94535	1
MsG0180003983.01	blue	0.722459	1
MsG0180004008.01	turquoise	0.886532	1
MsG0180004060.01	turquoise	0.807354	1
MsG0180004079.01	turquoise	0.918368	1
MsG0180003711.01	turquoise	0.320706	1
MsG0180003932.01	pink	0.32076	1
MsG0180003971.01	blue	0.465677	1
MsG0180003975.01	blue	0.470697	1
MsG0180004014.01	turquoise	0.314036	1
MsG0180004055.01	blue	0.75806	1
MsG0180004112.01	turquoise	0.941443	1
MsG0180003729.01	red	0.700803	1
MsG0180003854.01	yellow	0.4749	1
MsG0180003890.01	turquoise	0.0813786	1
MsG0180003928.01	yellow	0.898184	1
MsG0180003955.01	turquoise	0.883381	1
MsG0180003987.01	yellow	0.627507	1
MsG0180004048.01	blue	0.694127	1
MsG0180004103.01	turquoise	0.382871	1
MsG0180004105.01	turquoise	0.889264	1
MsG0180004148.01	blue	0.514669	1
MsG0180003687.01	turquoise	0.61386	1
MsG0180003689.01	turquoise	0.679973	1
MsG0180003754.01	turquoise	0.0965295	1
MsG0180003795.01	turquoise	0.906589	1
MsG0180003817.01	turquoise	0.72742	1
MsG0180003857.01	blue	0.611781	1
MsG0180003901.01	turquoise	0.587992	1
MsG0180003999.01	black	0.816904	1
MsG0180004066.01	blue	0.543545	1
MsG0180004111.01	blue	-0.0148213	1
MsG0180004147.01	turquoise	0.95866	1
MsG0180004150.01	turquoise	0.781529	1
MsG0180004215.01	yellow	0.286628	1
MsG0180004166.01	red	0.771011	1
MsG0180004164.01	turquoise	0.799249	1
MsG0180004173.01	turquoise	0.919249	1
MsG0180004249.01	turquoise	0.413596	1
MsG0180004312.01	blue	0.618808	1
MsG0180004318.01	blue	0.808477	1
MsG0180004400.01	turquoise	-0.0105694	1
MsG0180004537.01	turquoise	0.799224	1
MsG0180004346.01	brown	0.276725	1
MsG0180004520.01	turquoise	0.469315	1
MsG0180004554.01	blue	0.736363	1
MsG0180004223.01	green	0.84313	1
MsG0180004246.01	brown	0.861023	1
MsG0180004332.01	turquoise	0.0738794	1
MsG0180004371.01	turquoise	0.640725	1
MsG0180004375.01	blue	0.897753	1
MsG0180004532.01	turquoise	0.598169	1
MsG0180004562.01	turquoise	0.95452	1
MsG0180004599.01	grey	-0.450824	1
MsG0180004193.01	blue	0.571441	1
MsG0180004207.01	yellow	0.493404	1
MsG0180004220.01	blue	0.865465	1
MsG0180004260.01	turquoise	0.415812	1
MsG0180004263.01	yellow	0.769903	1
MsG0180004202.01	turquoise	0.937413	1
MsG0180004266.01	turquoise	0.378894	1
MsG0180004304.01	blue	0.681445	1
MsG0180004259.01	pink	0.768344	1
MsG0180004308.01	turquoise	0.432408	1
MsG0180004262.01	turquoise	0.942752	1
MsG0180004269.01	turquoise	0.460339	1
MsG0180004272.01	turquoise	0.218811	1
MsG0180004276.01	blue	0.683223	1
MsG0180004387.01	turquoise	0.604886	1
MsG0180004413.01	brown	0.349614	1
MsG0180004281.01	turquoise	0.481127	1
MsG0180004464.01	turquoise	0.885912	1
MsG0180004529.01	blue	0.42164	1
MsG0180004326.01	turquoise	0.801351	1
MsG0180004564.01	blue	0.702673	1
MsG0180004616.01	brown	0.58959	1
MsG0180004424.01	turquoise	0.949568	1
MsG0180004634.01	blue	0.498384	1
MsG0180004443.01	turquoise	0.805454	1
MsG0180004448.01	blue	0.428072	1
MsG0180004502.01	blue	0.367708	1
MsG0180004277.01	turquoise	0.956875	1
MsG0180004329.01	blue	0.615214	1
MsG0180004347.01	blue	0.642229	1
MsG0180004383.01	turquoise	0.799106	1
MsG0180004499.01	turquoise	0.372551	1
MsG0180004600.01	turquoise	0.793639	1
MsG0180004610.01	blue	0.380316	1
MsG0180004617.01	turquoise	0.348707	1
MsG0180004633.01	turquoise	0.25508	1
MsG0180004654.01	brown	0.554535	1
MsG0180004172.01	blue	0.839168	1
MsG0180004203.01	turquoise	0.821733	1
MsG0180004543.01	blue	0.752439	1
MsG0180004555.01	brown	0.790655	1
MsG0180004579.01	blue	0.840411	1
MsG0180004333.01	yellow	0.84777	1
MsG0180004404.01	turquoise	0.508869	1
MsG0180004480.01	blue	0.543837	1
MsG0180004518.01	turquoise	0.844133	1
MsG0180004622.01	blue	0.282307	1
MsG0180004625.01	turquoise	0.245577	1
MsG0180004183.01	blue	0.686165	1
MsG0180004222.01	turquoise	0.191411	1
MsG0180004299.01	blue	0.661351	1
MsG0180004335.01	blue	0.690332	1
MsG0180004349.01	brown	0.342925	1
MsG0180004381.01	red	0.588559	1
MsG0180004386.01	blue	0.613847	1
MsG0180004449.01	turquoise	0.685431	1
MsG0180004453.01	turquoise	0.868722	1
MsG0180004462.01	turquoise	0.920627	1
MsG0180004471.01	blue	0.566725	1
MsG0180004483.01	turquoise	0.892666	1
MsG0180004185.01	blue	0.774872	1
MsG0180004292.01	blue	0.539731	1
MsG0180004596.01	turquoise	0.778923	1
MsG0180004243.01	turquoise	0.345102	1
MsG0180004602.01	turquoise	0.696859	1
MsG0180004244.01	turquoise	0.305746	1
MsG0180004426.01	brown	0.225032	1
MsG0180004293.01	turquoise	0.635864	1
MsG0180004294.01	blue	0.627831	1
MsG0180004473.01	turquoise	0.743719	1
MsG0180004351.01	yellow	0.706345	1
MsG0180004495.01	turquoise	0.859955	1
MsG0180004168.01	turquoise	0.816591	1
MsG0180004498.01	turquoise	0.792763	1
MsG0180004181.01	turquoise	0.537057	1
MsG0180004192.01	blue	0.3552	1
MsG0180004242.01	turquoise	0.159416	1
MsG0180004507.01	pink	0.654171	1
MsG0180004290.01	blue	0.770595	1
MsG0180004522.01	brown	0.715063	1
MsG0180004441.01	turquoise	0.811311	1
MsG0180004445.01	blue	0.366577	1
MsG0180004167.01	turquoise	0.508518	1
MsG0180004188.01	turquoise	0.110902	1
MsG0180004544.01	turquoise	0.876042	1
MsG0180004463.01	turquoise	0.889157	1
MsG0180004189.01	blue	0.888463	1
MsG0180004497.01	blue	0.798813	1
MsG0180004500.01	blue	0.67606	1
MsG0180004509.01	yellow	0.734989	1
MsG0180004524.01	blue	0.558115	1
MsG0180004548.01	green	0.411256	1
MsG0180004583.01	blue	0.514063	1
MsG0180004496.01	blue	0.915002	1
MsG0180004594.01	turquoise	0.33526	1
MsG0180004258.01	turquoise	0.913886	1
MsG0180004506.01	blue	0.55596	1
MsG0180004595.01	blue	0.967799	1
MsG0180004603.01	turquoise	0.82375	1
MsG0180004606.01	turquoise	0.689202	1
MsG0180004559.01	blue	0.6212	1
MsG0180004270.01	black	0.723946	1
MsG0180004298.01	blue	0.868342	1
MsG0180004305.01	blue	0.720536	1
MsG0180004325.01	turquoise	0.795904	1
MsG0180004366.01	blue	0.761316	1
MsG0180004388.01	turquoise	0.453929	1
MsG0180004399.01	turquoise	0.620913	1
MsG0180004433.01	blue	0.500273	1
MsG0180004460.01	turquoise	0.824429	1
MsG0180004515.01	turquoise	0.867787	1
MsG0180004574.01	red	0.527082	1
MsG0180004184.01	blue	0.73979	1
MsG0180004328.01	turquoise	0.805197	1
MsG0180004348.01	turquoise	0.219396	1
MsG0180004376.01	blue	0.771505	1
MsG0180004384.01	blue	0.0801327	1
MsG0180004412.01	turquoise	0.711139	1
MsG0180004414.01	turquoise	0.389851	1
MsG0180004415.01	greenyellow	0.852996	1
MsG0180004428.01	blue	0.592195	1
MsG0180004434.01	turquoise	-0.0403747	1
MsG0180004452.01	yellow	0.656645	1
MsG0180004468.01	blue	0.819313	1
MsG0180004514.01	green	0.621874	1
MsG0180004547.01	turquoise	0.418533	1
MsG0180004155.01	turquoise	0.305895	1
MsG0180004160.01	turquoise	0.456683	1
MsG0180004201.01	turquoise	0.684559	1
MsG0180004206.01	turquoise	0.123532	1
MsG0180004267.01	blue	0.294625	1
MsG0180004286.01	blue	0.419485	1
MsG0180004352.01	yellow	0.575482	1
MsG0180004354.01	black	0.351136	1
MsG0180004378.01	turquoise	0.798507	1
MsG0180004466.01	blue	0.42653	1
MsG0180004504.01	blue	0.452819	1
MsG0180004650.01	turquoise	0.839649	1
MsG0180004283.01	turquoise	0.620766	1
MsG0180004288.01	turquoise	0.794919	1
MsG0180004297.01	turquoise	0.465923	1
MsG0180004322.01	turquoise	0.224329	1
MsG0180004362.01	turquoise	0.333109	1
MsG0180004457.01	blue	0.722918	1
MsG0180004467.01	blue	0.79996	1
MsG0180004510.01	turquoise	0.541481	1
MsG0180004538.01	blue	0.60626	1
MsG0180004575.01	turquoise	0.20431	1
MsG0180004581.01	green	0.810964	1
MsG0180004647.01	turquoise	0.694627	1
MsG0180004669.01	yellow	0.723933	1
MsG0180004656.01	green	0.460897	1
MsG0180004657.01	yellow	0.853079	1
MsG0180004660.01	blue	0.934695	1
MsG0180004732.01	turquoise	0.976973	1
MsG0180004806.01	blue	0.638074	1
MsG0180004856.01	turquoise	0.270718	1
MsG0180004925.01	turquoise	0.932945	1
MsG0180004965.01	turquoise	0.943533	1
MsG0180004972.01	blue	0.556324	1
MsG0180005047.01	blue	0.641427	1
MsG0180005051.01	turquoise	0.725388	1
MsG0180005052.01	turquoise	0.668297	1
MsG0180005064.01	blue	0.712815	1
MsG0180005066.01	red	0.749995	1
MsG0180005127.01	turquoise	0.948611	1
MsG0180005132.01	turquoise	0.48977	1
MsG0180005142.01	blue	0.620686	1
MsG0180004684.01	turquoise	0.456673	1
MsG0180004774.01	blue	0.632058	1
MsG0180004779.01	yellow	0.650791	1
MsG0180004780.01	turquoise	0.606093	1
MsG0180004860.01	brown	0.783543	1
MsG0180004869.01	turquoise	0.907787	1
MsG0180004957.01	blue	0.700293	1
MsG0180004980.01	turquoise	0.174741	1
MsG0180004995.01	blue	0.500725	1
MsG0180004701.01	yellow	0.4117	1
MsG0180004707.01	blue	0.896259	1
MsG0180004713.01	turquoise	0.587367	1
MsG0180004716.01	turquoise	0.768727	1
MsG0180004766.01	purple	0.870703	1
MsG0180004811.01	turquoise	0.33866	1
MsG0180004868.01	yellow	0.448116	1
MsG0180004953.01	green	0.91784	1
MsG0180005059.01	turquoise	0.8075	1
MsG0180005121.01	blue	0.861343	1
MsG0180005141.01	blue	0.150706	1
MsG0180004703.01	brown	0.881749	1
MsG0180004772.01	turquoise	0.128457	1
MsG0180004803.01	turquoise	0.424813	1
MsG0180004810.01	red	0.384426	1
MsG0180004846.01	turquoise	0.829767	1
MsG0180004855.01	blue	0.809148	1
MsG0180004880.01	turquoise	0.967016	1
MsG0180004915.01	yellow	0.857162	1
MsG0180004918.01	turquoise	-0.0409443	1
MsG0180004932.01	red	0.713096	1
MsG0180004997.01	turquoise	0.613135	1
MsG0180005022.01	turquoise	-0.0375351	1
MsG0180005118.01	turquoise	-0.126451	1
MsG0180005120.01	brown	0.143124	1
MsG0180005135.01	blue	0.642012	1
MsG0180004661.01	blue	0.626136	1
MsG0180004743.01	blue	0.113949	1
MsG0180004744.01	turquoise	0.922543	1
MsG0180004752.01	turquoise	0.910572	1
MsG0180004762.01	turquoise	0.542967	1
MsG0180004835.01	blue	0.956224	1
MsG0180004928.01	turquoise	0.476844	1
MsG0180004933.01	red	0.88515	1
MsG0180004951.01	turquoise	0.409603	1
MsG0180004958.01	blue	0.125522	1
MsG0180004970.01	turquoise	0.263439	1
MsG0180005021.01	turquoise	0.0874388	1
MsG0180005054.01	turquoise	0.919742	1
MsG0180005061.01	turquoise	0.748702	1
MsG0180005076.01	red	0.553148	1
MsG0180005083.01	blue	0.324038	1
MsG0180005089.01	blue	0.86181	1
MsG0180005154.01	blue	0.382753	1
MsG0180004659.01	blue	0.400489	1
MsG0180004658.01	turquoise	0.59389	1
MsG0180004715.01	blue	0.635077	1
MsG0180004922.01	blue	0.457729	1
MsG0180004974.01	turquoise	0.107163	1
MsG0180004975.01	blue	0.787281	1
MsG0180005002.01	blue	0.885947	1
MsG0180005048.01	blue	0.693773	1
MsG0180005131.01	blue	0.56495	1
MsG0180005143.01	turquoise	0.55394	1
MsG0180005153.01	red	0.561718	1
MsG0180004662.01	turquoise	0.756123	1
MsG0180004736.01	pink	0.682765	1
MsG0180004776.01	brown	0.430356	1
MsG0180004805.01	turquoise	0.451425	1
MsG0180004817.01	blue	0.415816	1
MsG0180004879.01	turquoise	0.977312	1
MsG0180004940.01	turquoise	0.518628	1
MsG0180004942.01	turquoise	0.958972	1
MsG0180004978.01	brown	0.206365	1
MsG0180005039.01	brown	0.888081	1
MsG0180005049.01	blue	0.826329	1
MsG0180005065.01	turquoise	0.838437	1
MsG0180004704.01	turquoise	0.86637	1
MsG0180004769.01	yellow	0.721561	1
MsG0180004816.01	blue	0.58162	1
MsG0180004867.01	turquoise	0.745525	1
MsG0180004895.01	turquoise	0.720608	1
MsG0180004924.01	turquoise	0.845009	1
MsG0180004973.01	yellow	0.681128	1
MsG0180005016.01	blue	0.914217	1
MsG0180005018.01	turquoise	0.886696	1
MsG0180005041.01	turquoise	0.525151	1
MsG0180005043.01	black	0.359743	1
MsG0180005150.01	turquoise	0.783051	1
MsG0180004691.01	turquoise	0.508368	1
MsG0180004724.01	brown	0.467812	1
MsG0180004755.01	turquoise	0.588172	1
MsG0180004800.01	turquoise	0.904709	1
MsG0180004930.01	turquoise	0.264972	1
MsG0180004981.01	yellow	0.788192	1
MsG0180005005.01	blue	0.859457	1
MsG0180005026.01	turquoise	0.396959	1
MsG0180005031.01	blue	0.95666	1
MsG0180005063.01	brown	0.593795	1
MsG0180005080.01	turquoise	0.789994	1
MsG0180005130.01	turquoise	0.604461	1
MsG0180004671.01	yellow	0.689163	1
MsG0180004680.01	turquoise	0.52759	1
MsG0180004712.01	blue	0.680038	1
MsG0180004728.01	black	0.65335	1
MsG0180004761.01	blue	0.589931	1
MsG0180004802.01	turquoise	0.454147	1
MsG0180004804.01	blue	0.312624	1
MsG0180004809.01	turquoise	0.457526	1
MsG0180004907.01	blue	0.844382	1
MsG0180005117.01	purple	0.811563	1
MsG0180004740.01	green	0.800933	1
MsG0180004794.01	yellow	0.366794	1
MsG0180004822.01	brown	0.872543	1
MsG0180004830.01	yellow	0.736296	1
MsG0180004878.01	black	0.247094	1
MsG0180004919.01	turquoise	0.72514	1
MsG0180004956.01	turquoise	0.746808	1
MsG0180004979.01	blue	0.709631	1
MsG0180004984.01	blue	0.138262	1
MsG0180004986.01	turquoise	0.450512	1
MsG0180005067.01	turquoise	0.97733	1
MsG0180005082.01	turquoise	0.857999	1
MsG0180004674.01	red	0.65524	1
MsG0180004731.01	pink	0.739204	1
MsG0180004734.01	turquoise	0.899689	1
MsG0180004735.01	blue	0.765799	1
MsG0180004737.01	green	0.591055	1
MsG0180004827.01	blue	0.735822	1
MsG0180004908.01	blue	0.946219	1
MsG0180004977.01	brown	0.734007	1
MsG0180005060.01	turquoise	0.845161	1
MsG0180005093.01	turquoise	0.0678139	1
MsG0180005151.01	turquoise	0.440349	1
MsG0180004706.01	blue	0.502929	1
MsG0180004733.01	blue	0.875264	1
MsG0180004749.01	red	0.457302	1
MsG0180004765.01	turquoise	0.574837	1
MsG0180004771.01	blue	0.704732	1
MsG0180004866.01	turquoise	0.401458	1
MsG0180005096.01	turquoise	0.758399	1
MsG0180005119.01	green	0.652716	1
MsG0180005137.01	blue	0.706749	1
MsG0180004687.01	turquoise	0.566316	1
MsG0180004699.01	turquoise	0.391845	1
MsG0180004705.01	turquoise	0.500894	1
MsG0180004714.01	blue	0.64988	1
MsG0180004777.01	turquoise	0.899607	1
MsG0180004747.01	blue	0.367057	1
MsG0180004679.01	turquoise	0.605676	1
MsG0180004783.01	blue	0.907094	1
MsG0180004739.01	blue	0.820058	1
MsG0180004789.01	turquoise	0.963279	1
MsG0180004801.01	turquoise	0.946215	1
MsG0180004838.01	blue	0.140469	1
MsG0180004850.01	yellow	0.81916	1
MsG0180004876.01	turquoise	0.922768	1
MsG0180004927.01	turquoise	0.866725	1
MsG0180004909.01	blue	0.455479	1
MsG0180004941.01	turquoise	0.912816	1
MsG0180004926.01	turquoise	0.935378	1
MsG0180004917.01	turquoise	0.720718	1
MsG0180004967.01	brown	0.554008	1
MsG0180005023.01	turquoise	0.111903	1
MsG0180005025.01	turquoise	-0.126075	1
MsG0180005038.01	blue	0.788264	1
MsG0180005045.01	turquoise	0.252	1
MsG0180005095.01	turquoise	0.383932	1
MsG0180005101.01	brown	0.720699	1
MsG0180005087.01	brown	0.698049	1
MsG0180005104.01	turquoise	-0.412503	1
MsG0180005108.01	grey	0.852709	1
MsG0180005146.01	turquoise	0.837927	1
MsG0180005160.01	pink	0.34191	1
MsG0180005157.01	pink	0.858467	1
MsG0180005172.01	turquoise	0.954693	1
MsG0180005166.01	red	0.806514	1
MsG0180005156.01	blue	0.245303	1
MsG0180005171.01	turquoise	0.851408	1
MsG0180005191.01	turquoise	0.901052	1
MsG0180005240.01	turquoise	0.629704	1
MsG0180005367.01	blue	0.769741	1
MsG0180005372.01	turquoise	0.594799	1
MsG0180005476.01	blue	0.844663	1
MsG0180005515.01	blue	0.881616	1
MsG0180005162.01	turquoise	0.326378	1
MsG0180005234.01	brown	0.529831	1
MsG0180005242.01	brown	0.760745	1
MsG0180005279.01	turquoise	0.711397	1
MsG0180005281.01	turquoise	0.324492	1
MsG0180005288.01	pink	0.667666	1
MsG0180005427.01	turquoise	0.754393	1
MsG0180005480.01	blue	0.79934	1
MsG0180005499.01	blue	0.166891	1
MsG0180005508.01	turquoise	0.477182	1
MsG0180005523.01	turquoise	0.713566	1
MsG0180005549.01	turquoise	0.371731	1
MsG0180005571.01	turquoise	0.83393	1
MsG0180005584.01	blue	0.110224	1
MsG0180005621.01	blue	0.500124	1
MsG0180005632.01	turquoise	0.666833	1
MsG0180005168.01	green	0.496865	1
MsG0180005207.01	green	0.790533	1
MsG0180005210.01	green	0.593692	1
MsG0180005231.01	turquoise	0.577422	1
MsG0180005276.01	green	0.895345	1
MsG0180005305.01	yellow	0.277884	1
MsG0180005306.01	green	0.52859	1
MsG0180005443.01	turquoise	0.852048	1
MsG0180005450.01	turquoise	0.376646	1
MsG0180005488.01	turquoise	0.112613	1
MsG0180005529.01	blue	0.8656	1
MsG0180005557.01	green	0.82834	1
MsG0180005563.01	yellow	0.70723	1
MsG0180005569.01	grey	0.0146943	1
MsG0180005574.01	turquoise	0.950284	1
MsG0180005595.01	turquoise	0.576231	1
MsG0180005618.01	red	0.869063	1
MsG0180005221.01	black	0.569676	1
MsG0180005353.01	turquoise	0.695725	1
MsG0180005368.01	grey	-0.428692	1
MsG0180005503.01	blue	0.369259	1
MsG0180005510.01	blue	0.488321	1
MsG0180005533.01	brown	0.799111	1
MsG0180005587.01	blue	0.609624	1
MsG0180005612.01	green	0.527634	1
MsG0180005636.01	turquoise	0.930003	1
MsG0180005220.01	green	0.330027	1
MsG0180005225.01	turquoise	0.878431	1
MsG0180005362.01	brown	0.586499	1
MsG0180005363.01	brown	0.513799	1
MsG0180005381.01	brown	0.266763	1
MsG0180005394.01	turquoise	0.22406	1
MsG0180005408.01	turquoise	0.878787	1
MsG0180005414.01	blue	0.632462	1
MsG0180005448.01	blue	0.186818	1
MsG0180005555.01	green	0.855425	1
MsG0180005625.01	turquoise	0.26674	1
MsG0180005200.01	black	0.848154	1
MsG0180005267.01	turquoise	0.407888	1
MsG0180005358.01	turquoise	0.913791	1
MsG0180005430.01	turquoise	0.709613	1
MsG0180005449.01	turquoise	0.680267	1
MsG0180005456.01	turquoise	0.319696	1
MsG0180005473.01	blue	0.822221	1
MsG0180005483.01	black	0.575155	1
MsG0180005534.01	turquoise	-0.0481104	1
MsG0180005548.01	blue	0.346041	1
MsG0180005556.01	green	0.877408	1
MsG0180005558.01	green	0.876528	1
MsG0180005562.01	blue	0.746522	1
MsG0180005648.01	turquoise	0.901467	1
MsG0180005226.01	turquoise	0.431557	1
MsG0180005219.01	turquoise	0.256997	1
MsG0180005271.01	turquoise	0.819136	1
MsG0180005277.01	green	0.801088	1
MsG0180005311.01	red	0.803578	1
MsG0180005400.01	brown	0.496441	1
MsG0180005516.01	blue	0.482471	1
MsG0180005391.01	turquoise	0.661423	1
MsG0180005421.01	pink	0.980887	1
MsG0180005565.01	blue	0.77116	1
MsG0180005576.01	turquoise	0.910837	1
MsG0180005479.01	blue	0.74783	1
MsG0180005615.01	turquoise	0.49793	1
[truncated: 11,631 more rows]
