# Supplementary material for: Transcriptomic Analysis to Identify Melatonin-mediated Salt-responsive Genes During the Germinated Stage of Alfalfa
Source: Preprints.org preprint supplement (doi:10.20944/preprints202403.0648.v1), 2024-03-12
Supplement: Supplementary file 2 [file Table S2.xlsx]

## Sheet: Sheet1
Supplemental table S2. GO functional annotation of differentially expressed genes through pairwise comparison of gene sets
Term type	Term	GO	ZMNMT_vs_ZMCK_G num	ZMNMT_vs_ZMCK_G percent	ZMNMT_vs_ZMCK_G list	ZMN_vs_ZMNMT num	ZMN_vs_ZMNMT percent	ZMN_vs_ZMNMT list	ZMN_vs_ZMCK_G num	ZMN_vs_ZMCK_G percent	ZMN_vs_ZMCK_G list
biological_process	cell killing	GO:0001906	2	0.000452284034374(2/4422)	MsG0880045358.01;MsG0280010228.01	2	0.000441988950276(2/4525)	MsG0880045358.01;MsG0280010228.01	1	0.000458505272811(1/2181)	MsG0280010228.01
biological_process	immune system process	GO:0002376	19	0.00429669832655(19/4422)	MsG0780038914.01;MsG0580029430.01;MsG0480023520.01;MsG0480023523.01;MsG0880045351.01;MsG0480022351.01;MsG0380015931.01;MsG0380016920.01;MsG0780038373.01;MsG0780041652.01;MsG0880045350.01;MsG0580029429.01;MsG0380016169.01;MsG0880045924.01;MsG0580029432.01;MsG0580029437.01;MsG0480023518.01;MsG0580024847.01;MsG0180002811.01	19	0.00419889502762(19/4525)	MsG0780038914.01;MsG0580029430.01;MsG0480023520.01;MsG0480023523.01;MsG0880045351.01;MsG0480022351.01;MsG0380015931.01;MsG0380016920.01;MsG0780038373.01;MsG0780041652.01;MsG0880045350.01;MsG0580029429.01;MsG0380016169.01;MsG0880045924.01;MsG0580029432.01;MsG0580029437.01;MsG0480023518.01;MsG0580024847.01;MsG0180002811.01	6	0.00275103163686(6/2181)	MsG0880045351.01;MsG0880045350.01;MsG0380016169.01;MsG0880045924.01;MsG0580029437.01;MsG0180001837.01
biological_process	carbon utilization	GO:0015976	1	0.000226142017187(1/4422)	MsG0680030439.01	1	0.000220994475138(1/4525)	MsG0680030439.01	0	0	none
biological_process	biological regulation	GO:0065007	799	0.180687471732(799/4422)	MsG0380015340.01;MsG0680030699.01;MsG0680034728.01;MsG0280006935.01;MsG0880046030.01;MsG0680033015.01;MsG0580025308.01;MsG0180006012.01;MsG0880046263.01;MsG0480019077.01;MsG0680030542.01;MsG0780039263.01;MsG0280009642.01;MsG0580029417.01;MsG0780040671.01;MsG0880042862.01;MsG0380017248.01;MsG0580025117.01;MsG0580028560.01;MsG0280008601.01;MsG0480020708.01;MsG0280007612.01;MsG0480019028.01;MsG03800…	816	0.180331491713(816/4525)	MsG0380015340.01;MsG0680030699.01;MsG0680034728.01;MsG0280006935.01;MsG0880046030.01;MsG0680033015.01;MsG0580025308.01;MsG0180006012.01;MsG0380017380.01;MsG0480019077.01;MsG0680030542.01;MsG0780039263.01;MsG0280009642.01;MsG0580029417.01;MsG0780040671.01;MsG0880042862.01;MsG0380017248.01;MsG0580025117.01;MsG0580028560.01;MsG0280008601.01;MsG0480020708.01;MsG0280007612.01;MsG0480019028.01;MsG03800…	321	0.147180192572(321/2181)	MsG0780039352.01;MsG0380017380.01;MsG0180000284.01;MsG0880045177.01;MsG0480022700.01;MsG0680031057.01;MsG0680031696.01;MsG0780039891.01;MsG0280008246.01;MsG0580029539.01;MsG0480020539.01;MsG0280007908.01;MsG0580024860.01;MsG0680034647.01;MsG0880045646.01;MsG0880043057.01;MsG0780040912.01;MsG0480023517.01;MsG0180000214.01;MsG0280007911.01;MsG0780039391.01;MsG0580030029.01;MsG0380017248.01;MsG03800…
biological_process	metabolic process	GO:0008152	2031	0.459294436906(2031/4422)	MsG0680030699.01;MsG0480022530.01;MsG0580024343.01;MsG0880046030.01;MsG0680033015.01;MsG0480019532.01;MsG0180003210.01;MsG0480021554.01;MsG0380015016.01;MsG0580025234.01;MsG0480020241.01;MsG0280009691.01;MsG0280011149.01;MsG0880047656.01;MsG0480020814.01;MsG0180004452.01;MsG0580026704.01;MsG0380016195.01;MsG0480022534.01;MsG0880046180.01;MsG0180000580.01;MsG0780037741.01;MsG0380011663.01;MsG05800…
sG0780040022.01;MsG0780041217.01;MsG0580025998.01;MsG0480021885.01;MsG0680032431.01;MsG0480019238.01;MsG0180003992.01;MsG0480022309.01;MsG0580029041.01;MsG0180001712.01;MsG0180003070.01;MsG0880045929.01;MsG0480022946.01;MsG0480021922.01;MsG0880044003.01;MsG0780036876.01;MsG0180002876.01;MsG0380016889.01;MsG0580027754.01;MsG0180003795.01;MsG0380011584.01;MsG0780040343.01;MsG0280010714.01;MsG088004…	2088	0.461436464088(2088/4525)	MsG0680030699.01;MsG0480019532.01;MsG0580024343.01;MsG0880046030.01;MsG0680033015.01;MsG0480022530.01;MsG0180003210.01;MsG0480021554.01;MsG0380015016.01;MsG0580025234.01;MsG0480020241.01;MsG0580029224.01;MsG0280009691.01;MsG0280011149.01;MsG0880047656.01;MsG0480020814.01;MsG0180004452.01;MsG0680031004.01;MsG0380016195.01;MsG0480022534.01;MsG0880046180.01;MsG0180000580.01;MsG0780037741.01;MsG03800…
sG0280006580.01;MsG0180002006.01;MsG0580024641.01;MsG0380016793.01;MsG0380016097.01;MsG0280007432.01;MsG0880042256.01;MsG0180005755.01;MsG0780037057.01;MsG0280009806.01;MsG0180004831.01;MsG0780041063.01;MsG0280006531.01;MsG0180004518.01;MsG0280008107.01;MsG0080048206.01;MsG0480021255.01;MsG0680031762.01;MsG0680031725.01;MsG0680030638.01;MsG0880042965.01;MsG0080048204.01;MsG0680031007.01;MsG078003…	973	0.446125630445(973/2181)	MsG0780038684.01;MsG0780040752.01;MsG0480022530.01;MsG0380012622.01;MsG0380013770.01;MsG0280008280.01;MsG0680033971.01;MsG0680031150.01;MsG0380013970.01;MsG0580027880.01;MsG0180001258.01;MsG0180003210.01;MsG0480021554.01;MsG0780037235.01;MsG0380015016.01;MsG0780038922.01;MsG0880042556.01;MsG0380014605.01;MsG0180004774.01;MsG0180004924.01;MsG0780036582.01;MsG0680030304.01;MsG0480020241.01;MsG02800…
biological_process	multi-organism process	GO:0051704	199	0.0450022614202(199/4422)	MsG0180003275.01;MsG0280009128.01;MsG0380012938.01;MsG0880046106.01;MsG0180001142.01;MsG0680030648.01;MsG0280009347.01;MsG0180001133.01;MsG0880045358.01;MsG0580028446.01;MsG0180001497.01;MsG0680035445.01;MsG0480022351.01;MsG0580025853.01;MsG0380012304.01;MsG0580024583.01;MsG0280011042.01;MsG0280007612.01;MsG0780038015.01;MsG0880043906.01;MsG0480019037.01;MsG0380011975.01;MsG0480021627.01;MsG06800…	200	0.0441988950276(200/4525)	MsG0180003275.01;MsG0280009128.01;MsG0380012938.01;MsG0880046106.01;MsG0180001142.01;MsG0680030648.01;MsG0280009347.01;MsG0180001133.01;MsG0880045358.01;MsG0580028446.01;MsG0180001497.01;MsG0680035445.01;MsG0480022351.01;MsG0580025853.01;MsG0380012304.01;MsG0580024583.01;MsG0280011042.01;MsG0280007612.01;MsG0780038015.01;MsG0880043906.01;MsG0480019037.01;MsG0380011975.01;MsG0480021627.01;MsG06800…	75	0.0343878954608(75/2181)	MsG0880045351.01;MsG0480019894.01;MsG0880045963.01;MsG0880046106.01;MsG0580026077.01;MsG0880047581.01;MsG0580025850.01;MsG0180001480.01;MsG0480022607.01;MsG0680032833.01;MsG0880045350.01;MsG0280010269.01;MsG0680031655.01;MsG0380016451.01;MsG0480020057.01;MsG0880042288.01;MsG0180005060.01;MsG0280011042.01;MsG0380014427.01;MsG0580025837.01;MsG0580026162.01;MsG0280010228.01;MsG0580025399.01;MsG05800…
biological_process	locomotion	GO:0040011	10	0.00226142017187(10/4422)	MsG0580027613.01;MsG0480020857.01;MsG0380011703.01;MsG0180000897.01;MsG0380011697.01;MsG0480023345.01;MsG0180004027.01;MsG0180000899.01;MsG0380011702.01;MsG0380011701.01	10	0.00220994475138(10/4525)	MsG0580027613.01;MsG0480020857.01;MsG0380011703.01;MsG0180000897.01;MsG0380011697.01;MsG0480023345.01;MsG0180004027.01;MsG0180000899.01;MsG0380011702.01;MsG0380011701.01	5	0.00229252636405(5/2181)	MsG0180000899.01;MsG0180000897.01;MsG0180004027.01;MsG0380011697.01;MsG0380011702.01
biological_process	reproductive process	GO:0022414	125	0.0282677521483(125/4422)	MsG0480019221.01;MsG0680030699.01;MsG0480022530.01;MsG0880046106.01;MsG0680033015.01;MsG0380011636.01;MsG0080048797.01;MsG0280006582.01;MsG0780039818.01;MsG0380011638.01;MsG0380013682.01;MsG0480020241.01;MsG0280006586.01;MsG0180005835.01;MsG0580026534.01;MsG0780038015.01;MsG0880044629.01;MsG0280009510.01;MsG0380015572.01;MsG0380012766.01;MsG0180000832.01;MsG0380012273.01;MsG0280010848.01;MsG01800…	125	0.0276243093923(125/4525)	MsG0480019221.01;MsG0680030699.01;MsG0480022530.01;MsG0880046106.01;MsG0680033015.01;MsG0380011636.01;MsG0080048797.01;MsG0280006582.01;MsG0780039818.01;MsG0380011638.01;MsG0380013682.01;MsG0480020241.01;MsG0280006586.01;MsG0180005835.01;MsG0580026534.01;MsG0780038015.01;MsG0880044629.01;MsG0280009510.01;MsG0380015572.01;MsG0380012766.01;MsG0180000832.01;MsG0380012273.01;MsG0280010848.01;MsG01800…	49	0.0224667583677(49/2181)	MsG0480022530.01;MsG0380012254.01;MsG0380011639.01;MsG0480020219.01;MsG0680031696.01;MsG0780038515.01;MsG0180002709.01;MsG0280010835.01;MsG0480020057.01;MsG0380011638.01;MsG0580027337.01;MsG0380013126.01;MsG0880046106.01;MsG0380012396.01;MsG0480020241.01;MsG0480019221.01;MsG0380017002.01;MsG0280006581.01;MsG0880046039.01;MsG0380013436.01;MsG0780041079.01;MsG0280010295.01;MsG0280010296.01;MsG01800…
biological_process	reproduction	GO:0000003	3	0.00067842605156(3/4422)	MsG0780038015.01;MsG0880046106.01;MsG0580024583.01	3	0.000662983425414(3/4525)	MsG0780038015.01;MsG0880046106.01;MsG0580024583.01	3	0.00137551581843(3/2181)	MsG0480020057.01;MsG0880046106.01;MsG0580024583.01
biological_process	cell population proliferation	GO:0008283	2	0.000452284034374(2/4422)	MsG0180000340.01;MsG0780041660.01	2	0.000441988950276(2/4525)	MsG0180000340.01;MsG0780041660.01	0	0	none
biological_process	cellular component organization or biogenesis	GO:0071840	271	0.0612844866576(271/4422)	MsG0280007632.01;MsG0680030699.01;MsG0480023115.01;MsG0480023793.01;MsG0180000260.01;MsG0680033015.01;MsG0680030638.01;MsG0380011701.01;MsG0580030141.01;MsG0580024860.01;MsG0080048797.01;MsG0880045382.01;MsG0480022962.01;MsG0580026206.01;MsG0780039818.01;MsG0180000214.01;MsG0580024608.01;MsG0380013855.01;MsG0480018448.01;MsG0880046020.01;MsG0380016723.01;MsG0780039224.01;MsG0280010632.01;MsG07800…	281	0.0620994475138(281/4525)	MsG0280007632.01;MsG0680030699.01;MsG0480023115.01;MsG0480023793.01;MsG0180000260.01;MsG0680033015.01;MsG0680030638.01;MsG0380011701.01;MsG0580030141.01;MsG0580024860.01;MsG0080048797.01;MsG0880045382.01;MsG0480022962.01;MsG0580026206.01;MsG0780039818.01;MsG0180000214.01;MsG0580024608.01;MsG0380013855.01;MsG0480018448.01;MsG0880046020.01;MsG0380016723.01;MsG0780039224.01;MsG0280010632.01;MsG07800…	138	0.0632737276479(138/2181)	MsG0480023115.01;MsG0880045177.01;MsG0680031696.01;MsG0580024860.01;MsG0280010269.01;MsG0780041364.01;MsG0780041198.01;MsG0480020915.01;MsG0380016723.01;MsG0780039224.01;MsG0180004595.01;MsG0780036638.01;MsG0880044994.01;MsG0180005667.01;MsG0680034852.01;MsG0480019754.01;MsG0180001234.01;MsG0480022348.01;MsG0180003565.01;MsG0580029933.01;MsG0580029868.01;MsG0880046975.01;MsG0180000214.01;MsG07800…
biological_process	cellular process	GO:0009987	1943	0.439393939394(1943/4422)	MsG0680030699.01;MsG0480022530.01;MsG0580024343.01;MsG0880046030.01;MsG0680033015.01;MsG0480019532.01;MsG0480019077.01;MsG0780039263.01;MsG0780040671.01;MsG0280006935.01;MsG0580025234.01;MsG0480020241.01;MsG0280011149.01;MsG0780036854.01;MsG0080048506.01;MsG0880047656.01;MsG0480020814.01;MsG0180004452.01;MsG0580026704.01;MsG0380016195.01;MsG0180004027.01;MsG0580025515.01;MsG0380011663.01;MsG05800…
sG0780036297.01;MsG0380016968.01;MsG0180005373.01;MsG0680035614.01;MsG0280009112.01;MsG0880046672.01;MsG0180006261.01;MsG0680030950.01;MsG0880047345.01;MsG0680031116.01;MsG0780040612.01;MsG0180005519.01;MsG0880043755.01;MsG0280006841.01;MsG0580025712.01;MsG0680034639.01	1997	0.441325966851(1997/4525)	MsG0680030699.01;MsG0480019532.01;MsG0580024343.01;MsG0880046030.01;MsG0680033015.01;MsG0480022530.01;MsG0480019077.01;MsG0780039263.01;MsG0780040671.01;MsG0280006935.01;MsG0580025234.01;MsG0480020241.01;MsG0580029224.01;MsG0280011149.01;MsG0780036854.01;MsG0080048506.01;MsG0880047656.01;MsG0480020814.01;MsG0180004452.01;MsG0580026704.01;MsG0380016195.01;MsG0180004027.01;MsG0580025515.01;MsG03800…
sG0580029437.01;MsG0780037052.01;MsG0280010637.01;MsG0680035001.01;MsG0280008340.01;MsG0880042642.01;MsG0280006588.01;MsG0180002083.01;MsG0180001848.01;MsG0480019295.01;MsG0880043876.01;MsG0380014016.01;MsG0580024608.01;MsG0180005562.01;MsG0580025846.01;MsG0180003993.01;MsG0380012392.01;MsG0780041535.01;MsG0280007751.01;MsG0680032247.01;MsG0180004259.01;MsG0680034275.01;MsG0380011872.01;MsG048001…	847	0.388353966071(847/2181)	MsG0780038684.01;MsG0480022530.01;MsG0380013770.01;MsG0680030991.01;MsG0680033971.01;MsG0680031150.01;MsG0380013970.01;MsG0280008246.01;MsG0480023115.01;MsG0480023945.01;MsG0480019028.01;MsG0780037235.01;MsG0780038922.01;MsG0180005357.01;MsG0180004924.01;MsG0580030029.01;MsG0480020241.01;MsG0280010144.01;MsG0580029224.01;MsG0880046573.01;MsG0780036854.01;MsG0580027616.01;MsG0680034959.01;MsG08800…
biological_process	developmental process	GO:0032502	93	0.0210312075984(93/4422)	MsG0880046106.01;MsG0780041090.01;MsG0780039818.01;MsG0780040671.01;MsG0180000340.01;MsG0380013855.01;MsG0480018448.01;MsG0880045386.01;MsG0580025117.01;MsG0180004104.01;MsG0180005835.01;MsG0580026534.01;MsG0380015828.01;MsG0880046039.01;MsG0180000350.01;MsG0280008385.01;MsG0280009510.01;MsG0480023063.01;MsG0380012766.01;MsG0180000832.01;MsG0280010848.01;MsG0080048315.01;MsG0780038753.01;MsG01800…	93	0.0205524861878(93/4525)	MsG0880046106.01;MsG0780041090.01;MsG0780039818.01;MsG0780040671.01;MsG0180000340.01;MsG0380013855.01;MsG0480018448.01;MsG0880045386.01;MsG0580025117.01;MsG0180004104.01;MsG0180005835.01;MsG0580026534.01;MsG0380015828.01;MsG0880046039.01;MsG0180000350.01;MsG0280008385.01;MsG0280009510.01;MsG0480023063.01;MsG0380012766.01;MsG0180000832.01;MsG0280010848.01;MsG0080048315.01;MsG0780038753.01;MsG01800…	45	0.0206327372765(45/2181)	MsG0180000028.01;MsG0880046106.01;MsG0480019221.01;MsG0180005562.01;MsG0880046072.01;MsG0780038744.01;MsG0280010569.01;MsG0280010269.01;MsG0180005199.01;MsG0180004102.01;MsG0180002187.01;MsG0580029691.01;MsG0280010835.01;MsG0480020057.01;MsG0180000534.01;MsG0480022691.01;MsG0780040928.01;MsG0580025117.01;MsG0480021968.01;MsG0480021291.01;MsG0380015828.01;MsG0880046039.01;MsG0880047535.01;MsG08800…
biological_process	multicellular organismal process	GO:0032501	50	0.0113071008593(50/4422)	MsG0680034764.01;MsG0480020408.01;MsG0480019221.01;MsG0680032013.01;MsG0080047899.01;MsG0280009806.01;MsG0780040671.01;MsG0380013855.01;MsG0380014584.01;MsG0480020857.01;MsG0480022359.01;MsG0480023458.01;MsG0280009510.01;MsG0280010551.01;MsG0280009939.01;MsG0580025683.01;MsG0180005835.01;MsG0580026534.01;MsG0680033942.01;MsG0880046039.01;MsG0180001856.01;MsG0080049009.01;MsG0880046789.01;MsG05800…	50	0.0110497237569(50/4525)	MsG0680034764.01;MsG0480020408.01;MsG0480019221.01;MsG0680032013.01;MsG0080047899.01;MsG0280009806.01;MsG0780040671.01;MsG0380013855.01;MsG0380014584.01;MsG0480020857.01;MsG0480022359.01;MsG0480023458.01;MsG0280009510.01;MsG0280010551.01;MsG0280009939.01;MsG0580025683.01;MsG0180005835.01;MsG0580026534.01;MsG0680033942.01;MsG0880046039.01;MsG0180001856.01;MsG0080049009.01;MsG0880046789.01;MsG05800…	18	0.00825309491059(18/2181)	MsG0480019221.01;MsG0480020915.01;MsG0480018405.01;MsG0180005519.01;MsG0180002978.01;MsG0480023063.01;MsG0780040578.01;MsG0880046053.01;MsG0280009939.01;MsG0180000105.01;MsG0280010848.01;MsG0880046039.01;MsG0280011113.01;MsG0880047535.01;MsG0880046789.01;MsG0280010835.01;MsG0180001848.01;MsG0580025683.01
biological_process	growth	GO:0040007	16	0.00361827227499(16/4422)	MsG0680031004.01;MsG0380013855.01;MsG0680035852.01;MsG0480018448.01;MsG0780040928.01;MsG0380016339.01;MsG0880046713.01;MsG0880046053.01;MsG0280009327.01;MsG0680034383.01;MsG0380015828.01;MsG0680033942.01;MsG0780039818.01;MsG0180002912.01;MsG0180005741.01;MsG0180005519.01	16	0.00353591160221(16/4525)	MsG0680031004.01;MsG0380013855.01;MsG0680035852.01;MsG0480018448.01;MsG0780040928.01;MsG0380016339.01;MsG0880046713.01;MsG0880046053.01;MsG0280009327.01;MsG0680034383.01;MsG0380015828.01;MsG0680033942.01;MsG0780039818.01;MsG0180002912.01;MsG0180005741.01;MsG0180005519.01	10	0.00458505272811(10/2181)	MsG0180005519.01;MsG0780040928.01;MsG0680034383.01;MsG0880046053.01;MsG0280009327.01;MsG0380015828.01;MsG0380016339.01;MsG0280010269.01;MsG0280009329.01;MsG0180005741.01
biological_process	rhythmic process	GO:0048511	6	0.00135685210312(6/4422)	MsG0580029200.01;MsG0480020869.01;MsG0180002232.01;MsG0480023945.01;MsG0080049009.01;MsG0180005005.01	6	0.00132596685083(6/4525)	MsG0580029200.01;MsG0480020869.01;MsG0180002232.01;MsG0480023945.01;MsG0080049009.01;MsG0180005005.01	3	0.00137551581843(3/2181)	MsG0580029200.01;MsG0480018405.01;MsG0480023945.01
biological_process	localization	GO:0051179	360	0.0814111261872(360/4422)	MsG0880046993.01;MsG0180004164.01;MsG0280011026.01;MsG0280010830.01;MsG0480020323.01;MsG0880043235.01;MsG0180003510.01;MsG0380015954.01;MsG0680034959.01;MsG0280007771.01;MsG0280007042.01;MsG0180002404.01;MsG0180004027.01;MsG0880044855.01;MsG0380015660.01;MsG0780038625.01;MsG0180001027.01;MsG0280008226.01;MsG0880047259.01;MsG0780040460.01;MsG0480018495.01;MsG0880042325.01;MsG0680031042.01;MsG07800…	365	0.0806629834254(365/4525)	MsG0880046993.01;MsG0280011290.01;MsG0180004164.01;MsG0280011026.01;MsG0280010830.01;MsG0480020323.01;MsG0880043235.01;MsG0180003510.01;MsG0380015954.01;MsG0680034959.01;MsG0280007771.01;MsG0280007042.01;MsG0180002404.01;MsG0180004027.01;MsG0880044855.01;MsG0380015660.01;MsG0780038625.01;MsG0180001027.01;MsG0280008226.01;MsG0880047259.01;MsG0780040460.01;MsG0480018495.01;MsG0880042325.01;MsG06800…	193	0.0884915176525(193/2181)	MsG0280007098.01;MsG0480022700.01;MsG0680035897.01;MsG0380016975.01;MsG0480023578.01;MsG0280011290.01;MsG0480023044.01;MsG0480022861.01;MsG0880042765.01;MsG0580024727.01;MsG0780041589.01;MsG0280010830.01;MsG0880042935.01;MsG0180004483.01;MsG0680035899.01;MsG0880043235.01;MsG0180000319.01;MsG0480021667.01;MsG0780041198.01;MsG0680031057.01;MsG0180003146.01;MsG0380016976.01;MsG0880044311.01;MsG01800…
biological_process	biological adhesion	GO:0022610	1	0.000226142017187(1/4422)	MsG0380017756.01	1	0.000220994475138(1/4525)	MsG0380017756.01	0	0	none
biological_process	detoxification	GO:0098754	6	0.00135685210312(6/4422)	MsG0580025998.01;MsG0380015010.01;MsG0480019997.01;MsG0580029511.01;MsG0380017016.01;MsG0380015836.01	6	0.00132596685083(6/4525)	MsG0580025998.01;MsG0380015010.01;MsG0480019997.01;MsG0580029511.01;MsG0380017016.01;MsG0380015836.01	3	0.00137551581843(3/2181)	MsG0380015836.01;MsG0480019997.01;MsG0380017016.01
biological_process	response to stimulus	GO:0050896	750	0.16960651289(750/4422)	MsG0180003275.01;MsG0680030699.01;MsG0680034728.01;MsG0680033015.01;MsG0180006012.01;MsG0880046263.01;MsG0480019077.01;MsG0480019193.01;MsG0680030542.01;MsG0780039263.01;MsG0480023945.01;MsG0780038922.01;MsG0880045358.01;MsG0280010830.01;MsG0680031814.01;MsG0180001497.01;MsG0680035445.01;MsG0580025117.01;MsG0280008262.01;MsG0480019037.01;MsG0480020814.01;MsG0180004452.01;MsG0680034959.01;MsG06800…	767	0.169502762431(767/4525)	MsG0180003275.01;MsG0680030699.01;MsG0680034728.01;MsG0680033015.01;MsG0180006012.01;MsG0880046263.01;MsG0480019077.01;MsG0480019193.01;MsG0680030542.01;MsG0780039263.01;MsG0480023945.01;MsG0780038922.01;MsG0880045358.01;MsG0280010830.01;MsG0680031814.01;MsG0180001497.01;MsG0680035445.01;MsG0580025117.01;MsG0280008262.01;MsG0480019037.01;MsG0480020814.01;MsG0180004452.01;MsG0680034959.01;MsG06800…	297	0.136176066025(297/2181)	MsG0880045351.01;MsG0780039352.01;MsG0680034647.01;MsG0880045177.01;MsG0480019894.01;MsG0680031696.01;MsG0780040592.01;MsG0580024408.01;MsG0280008246.01;MsG0580029539.01;MsG0680034967.01;MsG0280007908.01;MsG0680032833.01;MsG0080048934.01;MsG0480023945.01;MsG0280010269.01;MsG0780037235.01;MsG0380015549.01;MsG0680031655.01;MsG0780038922.01;MsG0380014427.01;MsG0280010830.01;MsG0180004879.01;MsG02800…
cellular_component	membrane-enclosed lumen	GO:0031974	7	0.00158299412031(7/4422)	MsG0580024608.01;MsG0280009510.01;MsG0780039847.01;MsG0380015731.01;MsG0580026742.01;MsG0580029437.01;MsG0380016889.01	9	0.00198895027624(9/4525)	MsG0580024608.01;MsG0280009510.01;MsG0780039847.01;MsG0380015731.01;MsG0580026742.01;MsG0580029047.01;MsG0780038861.01;MsG0580029437.01;MsG0380016889.01	3	0.00137551581843(3/2181)	MsG0580029047.01;MsG0580029437.01;MsG0880042739.01
cellular_component	protein-containing complex	GO:0032991	296	0.0669380370873(296/4422)	MsG0380015340.01;MsG0680030699.01;MsG0280007098.01;MsG0380012445.01;MsG0180003920.01;MsG0380012625.01;MsG0680033015.01;MsG0180003243.01;MsG0780040771.01;MsG0380013970.01;MsG0180004492.01;MsG0480023945.01;MsG0780041364.01;MsG0180005755.01;MsG0780040620.01;MsG0380016793.01;MsG0280011026.01;MsG0480020052.01;MsG0780036534.01;MsG0380011642.01;MsG0380013950.01;MsG0480019711.01;MsG0480023262.01;MsG08800…	313	0.0691712707182(313/4525)	MsG0380015340.01;MsG0680030699.01;MsG0280007098.01;MsG0380012445.01;MsG0180003920.01;MsG0380012625.01;MsG0680033015.01;MsG0180003243.01;MsG0780040771.01;MsG0380013970.01;MsG0180004492.01;MsG0480020957.01;MsG0780041364.01;MsG0180005755.01;MsG0780040620.01;MsG0580024151.01;MsG0280011026.01;MsG0480020052.01;MsG0780036534.01;MsG0380011642.01;MsG0380013950.01;MsG0480019711.01;MsG0180006067.01;MsG08800…	99	0.0453920220083(99/2181)	MsG0280007098.01;MsG0680031696.01;MsG0680031150.01;MsG0380013970.01;MsG0480023945.01;MsG0780041364.01;MsG0480020052.01;MsG0380017062.01;MsG0580024139.01;MsG0780041198.01;MsG0380015596.01;MsG0280011276.01;MsG0880044394.01;MsG0680034959.01;MsG0380013995.01;MsG0180003565.01;MsG0180000214.01;MsG0580025356.01;MsG0880044658.01;MsG0380013956.01;MsG0180003240.01;MsG0180004498.01;MsG0780040954.01;MsG06800…
cellular_component	membrane part	GO:0044425	1603	0.36250565355(1603/4422)	MsG0480022530.01;MsG0880046030.01;MsG0480019077.01;MsG0180003210.01;MsG0480021554.01;MsG0380015016.01;MsG0280011026.01;MsG0780040671.01;MsG0680031814.01;MsG0380015812.01;MsG0580025234.01;MsG0480020241.01;MsG0280009691.01;MsG0680033971.01;MsG0880047233.01;MsG0580024876.01;MsG0880046180.01;MsG0280010927.01;MsG0180004027.01;MsG0580025515.01;MsG0580026160.01;MsG0180000363.01;MsG0480021996.01;MsG08800…	1631	0.36044198895(1631/4525)	MsG0480022530.01;MsG0880046030.01;MsG0480019077.01;MsG0180003210.01;MsG0480021554.01;MsG0380015016.01;MsG0280011026.01;MsG0780040671.01;MsG0680031814.01;MsG0380015812.01;MsG0580025234.01;MsG0480020241.01;MsG0580029224.01;MsG0280009691.01;MsG0680033971.01;MsG0880047233.01;MsG0580024876.01;MsG0880046180.01;MsG0280010927.01;MsG0180004027.01;MsG0580025515.01;MsG0580026160.01;MsG0780038829.01;MsG04800…	811	0.371847776249(811/2181)	MsG0180005757.01;MsG0480022530.01;MsG0380013770.01;MsG0680033971.01;MsG0280011290.01;MsG0180003210.01;MsG0480021554.01;MsG0380015016.01;MsG0180004164.01;MsG0180003954.01;MsG0180004774.01;MsG0680031814.01;MsG0180000536.01;MsG0680035899.01;MsG0480020241.01;MsG0880043235.01;MsG0580029224.01;MsG0280009691.01;MsG0780039593.01;MsG0380017925.01;MsG0180004298.01;MsG0680034959.01;MsG0880042103.01;MsG08800…
cellular_component	extracellular region part	GO:0044421	28	0.00633197648123(28/4422)	MsG0580024517.01;MsG0480022657.01;MsG0880046427.01;MsG0580025870.01;MsG0580027860.01;MsG0680030638.01;MsG0380015731.01;MsG0580025873.01;MsG0280006552.01;MsG0280007934.01;MsG0880044972.01;MsG0880047506.01;MsG0280006553.01;MsG0080047978.01;MsG0580027876.01;MsG0180005131.01;MsG0280006550.01;MsG0380014288.01;MsG0180004286.01;MsG0580028377.01;MsG0480021298.01;MsG0180000106.01;MsG0580027863.01;MsG05800…	28	0.00618784530387(28/4525)	MsG0580024517.01;MsG0480022657.01;MsG0880046427.01;MsG0580025870.01;MsG0580027860.01;MsG0680030638.01;MsG0380015731.01;MsG0580025873.01;MsG0280006552.01;MsG0280007934.01;MsG0880044972.01;MsG0880047506.01;MsG0280006553.01;MsG0080047978.01;MsG0580027876.01;MsG0180005131.01;MsG0280006550.01;MsG0380014288.01;MsG0180004286.01;MsG0580028377.01;MsG0480021298.01;MsG0180000106.01;MsG0580027863.01;MsG05800…	13	0.00596056854654(13/2181)	MsG0580024517.01;MsG0280006553.01;MsG0180000106.01;MsG0580025870.01;MsG0180004286.01;MsG0280006550.01;MsG0580025876.01;MsG0580024529.01;MsG0280006552.01;MsG0280007934.01;MsG0080048038.01;MsG0480022657.01;MsG0080047978.01
cellular_component	organelle part	GO:0044422	349	0.0789235639982(349/4422)	MsG0380015340.01;MsG0680030699.01;MsG0680033015.01;MsG0280011026.01;MsG0380011642.01;MsG0380013682.01;MsG0880045386.01;MsG0480021910.01;MsG0880046213.01;MsG0380017700.01;MsG0080048560.01;MsG0780039593.01;MsG0480020595.01;MsG0280010592.01;MsG0880042019.01;MsG0280007042.01;MsG0280010927.01;MsG0180000348.01;MsG0180000580.01;MsG0780037741.01;MsG0580025662.01;MsG0580025358.01;MsG0080048775.01;MsG05800…	366	0.0808839779006(366/4525)	MsG0380015340.01;MsG0680030699.01;MsG0680033015.01;MsG0280011026.01;MsG0380011642.01;MsG0380013682.01;MsG0880045386.01;MsG0480021910.01;MsG0880046213.01;MsG0380017700.01;MsG0080048560.01;MsG0780039593.01;MsG0180005772.01;MsG0480020595.01;MsG0280010592.01;MsG0880042019.01;MsG0280007042.01;MsG0280010927.01;MsG0180000348.01;MsG0180000580.01;MsG0780037741.01;MsG0580025662.01;MsG0580025358.01;MsG00800…	128	0.0586886749198(128/2181)	MsG0880045177.01;MsG0680031696.01;MsG0880046072.01;MsG0580024860.01;MsG0380014016.01;MsG0780041364.01;MsG0780039224.01;MsG0280008073.01;MsG0680034852.01;MsG0780039593.01;MsG0280011276.01;MsG0180005060.01;MsG0180005016.01;MsG0780040472.01;MsG0580029933.01;MsG0180003565.01;MsG0580029868.01;MsG0880042019.01;MsG0280010927.01;MsG0180000214.01;MsG0880046468.01;MsG0280011188.01;MsG0580025356.01;MsG07800…
cellular_component	virion part	GO:0044423	1	0.000226142017187(1/4422)	MsG0880044262.01	1	0.000220994475138(1/4525)	MsG0880044262.01	0	0	none
cellular_component	organelle	GO:0043226	879	0.198778833107(879/4422)	MsG0680030699.01;MsG0080048314.01;MsG0880046427.01;MsG0680033015.01;MsG0380013970.01;MsG0180006012.01;MsG0680034655.01;MsG0280009667.01;MsG0680030629.01;MsG0480023945.01;MsG0580024975.01;MsG0780038129.01;MsG0580029417.01;MsG0180003954.01;MsG0380011642.01;MsG0280006935.01;MsG0780039377.01;MsG0880045386.01;MsG0580028560.01;MsG0880043235.01;MsG0280010144.01;MsG0280008601.01;MsG0480020708.01;MsG02800…	903	0.19955801105(903/4525)	MsG0680030699.01;MsG0080048314.01;MsG0880046427.01;MsG0680033015.01;MsG0380013970.01;MsG0180006012.01;MsG0680034655.01;MsG0280009667.01;MsG0680030629.01;MsG0480023945.01;MsG0580024975.01;MsG0780038129.01;MsG0580029417.01;MsG0180003954.01;MsG0380011642.01;MsG0280006935.01;MsG0780039377.01;MsG0880045386.01;MsG0580028560.01;MsG0880043235.01;MsG0280010144.01;MsG0280008601.01;MsG0480020708.01;MsG02800…	376	0.172397982577(376/2181)	MsG0380013970.01;MsG0480023945.01;MsG0180003954.01;MsG0180004774.01;MsG0580028560.01;MsG0880043235.01;MsG0280010144.01;MsG0380016873.01;MsG0180001085.01;MsG0880046148.01;MsG0380013491.01;MsG0680030964.01;MsG0180006038.01;MsG0080048038.01;MsG0580030081.01;MsG0280008093.01;MsG0480021094.01;MsG0280007074.01;MsG0180000383.01;MsG0680033820.01;MsG0580028723.01;MsG0580024409.01;MsG0780036234.01;MsG05800…
cellular_component	membrane	GO:0016020	775	0.17526006332(775/4422)	MsG0180003275.01;MsG0480022530.01;MsG0880046030.01;MsG0280009968.01;MsG0880046993.01;MsG0180005704.01;MsG0180003210.01;MsG0380015016.01;MsG0280011026.01;MsG0680035445.01;MsG0480020241.01;MsG0180001094.01;MsG0880043235.01;MsG0580029473.01;MsG0480021910.01;MsG0280009691.01;MsG0280008262.01;MsG0380017700.01;MsG0080048560.01;MsG0780039593.01;MsG0480020814.01;MsG0380015954.01;MsG0680035830.01;MsG08800…	785	0.173480662983(785/4525)	MsG0180003275.01;MsG0480022530.01;MsG0880046030.01;MsG0280009968.01;MsG0880046993.01;MsG0180005704.01;MsG0280011290.01;MsG0180003210.01;MsG0380015016.01;MsG0280011026.01;MsG0680035445.01;MsG0480020241.01;MsG0180005679.01;MsG0880043235.01;MsG0580029473.01;MsG0480021910.01;MsG0280009691.01;MsG0280008262.01;MsG0380017700.01;MsG0080048560.01;MsG0780039593.01;MsG0480020814.01;MsG0380015954.01;MsG06800…	385	0.176524530032(385/2181)	MsG0480022530.01;MsG0280009968.01;MsG0280011290.01;MsG0180003210.01;MsG0380015016.01;MsG0180004774.01;MsG0680035899.01;MsG0480020241.01;MsG0880043235.01;MsG0280009691.01;MsG0280008262.01;MsG0780039593.01;MsG0880047233.01;MsG0480021653.01;MsG0380013052.01;MsG0880042019.01;MsG0280010927.01;MsG0880044855.01;MsG0780038753.01;MsG0780039186.01;MsG0280008226.01;MsG0780040544.01;MsG0280010893.01;MsG02800…
cellular_component	cell junction	GO:0030054	12	0.00271370420624(12/4422)	MsG0180003275.01;MsG0480020463.01;MsG0480023759.01;MsG0780041447.01;MsG0680034649.01;MsG0880046933.01;MsG0180005225.01;MsG0880047546.01;MsG0780041177.01;MsG0180004027.01;MsG0580025515.01;MsG0480023927.01	12	0.00265193370166(12/4525)	MsG0180003275.01;MsG0480020463.01;MsG0480023759.01;MsG0780041447.01;MsG0680034649.01;MsG0880046933.01;MsG0180005225.01;MsG0880047546.01;MsG0780041177.01;MsG0180004027.01;MsG0580025515.01;MsG0480023927.01	9	0.0041265474553(9/2181)	MsG0480023759.01;MsG0480020463.01;MsG0380016662.01;MsG0180005225.01;MsG0880047546.01;MsG0680031815.01;MsG0180004027.01;MsG0780041177.01;MsG0480023927.01
cellular_component	extracellular region	GO:0005576	169	0.0382180009046(169/4422)	MsG0880046106.01;MsG0480019215.01;MsG0180000028.01;MsG0780038621.01;MsG0880045646.01;MsG0780037235.01;MsG0180000340.01;MsG0280006553.01;MsG0480019345.01;MsG0880046908.01;MsG0280010632.01;MsG0280009899.01;MsG0780038015.01;MsG0180005667.01;MsG0180005764.01;MsG0580027616.01;MsG0580027618.01;MsG0180004202.01;MsG0080047831.01;MsG0780040592.01;MsG0480022534.01;MsG0380016746.01;MsG0680034391.01;MsG04800…	172	0.0380110497238(172/4525)	MsG0880046106.01;MsG0480019215.01;MsG0180000028.01;MsG0780038621.01;MsG0880045646.01;MsG0780037235.01;MsG0180000340.01;MsG0280006553.01;MsG0480019345.01;MsG0880046908.01;MsG0280010632.01;MsG0280009899.01;MsG0780038015.01;MsG0180005667.01;MsG0180005764.01;MsG0580027616.01;MsG0580027618.01;MsG0180004202.01;MsG0080047831.01;MsG0780040592.01;MsG0480022534.01;MsG0380016746.01;MsG0680034391.01;MsG04800…	97	0.0444750114626(97/2181)	MsG0880046106.01;MsG0180000028.01;MsG0880046072.01;MsG0880045646.01;MsG0280006553.01;MsG0880046908.01;MsG0180005667.01;MsG0180005764.01;MsG0580027616.01;MsG0180001234.01;MsG0780040592.01;MsG0580027777.01;MsG0380012315.01;MsG0480023349.01;MsG0180004424.01;MsG0780038753.01;MsG0680034417.01;MsG0680030380.01;MsG0480023907.01;MsG0780040610.01;MsG0780040611.01;MsG0780038617.01;MsG0780040118.01;MsG07800…
cellular_component	nucleoid	GO:0009295	1	0.000226142017187(1/4422)	MsG0180002545.01	2	0.000441988950276(2/4525)	MsG0880046651.01;MsG0180002545.01	1	0.000458505272811(1/2181)	MsG0880046651.01
cellular_component	other organism part	GO:0044217	5	0.00113071008593(5/4422)	MsG0680031655.01;MsG0480021637.01;MsG0780038715.01;MsG0180002007.01;MsG0680032028.01	5	0.00110497237569(5/4525)	MsG0680031655.01;MsG0480021637.01;MsG0780038715.01;MsG0180002007.01;MsG0680032028.01	2	0.000917010545621(2/2181)	MsG0680031655.01;MsG0580028498.01
cellular_component	cell part	GO:0044464	1707	0.386024423338(1707/4422)	MsG0680030699.01;MsG0480022530.01;MsG0880046030.01;MsG0680033015.01;MsG0180006012.01;MsG0580029417.01;MsG0380013682.01;MsG0880045386.01;MsG0480020241.01;MsG0580028560.01;MsG0280008262.01;MsG0780036854.01;MsG0880047656.01;MsG0480020814.01;MsG0180004452.01;MsG0680034835.01;MsG0380016195.01;MsG0580024876.01;MsG0880044769.01;MsG0280010927.01;MsG0180000580.01;MsG0780037741.01;MsG0680030964.01;MsG05800…	1754	0.387624309392(1754/4525)	MsG0680030699.01;MsG0480022530.01;MsG0880046030.01;MsG0680033015.01;MsG0180006012.01;MsG0580029417.01;MsG0380013682.01;MsG0880045386.01;MsG0480020241.01;MsG0580028560.01;MsG0280008262.01;MsG0780036854.01;MsG0880047656.01;MsG0480020814.01;MsG0180004452.01;MsG0680034835.01;MsG0380016195.01;MsG0580024876.01;MsG0880044769.01;MsG0280011290.01;MsG0280010927.01;MsG0180000580.01;MsG0780037741.01;MsG06800…	783	0.359009628611(783/2181)	MsG0480022530.01;MsG0680031150.01;MsG0380013970.01;MsG0280011290.01;MsG0280009667.01;MsG0480023945.01;MsG0780038922.01;MsG0180003954.01;MsG0180004774.01;MsG0480021968.01;MsG0680035899.01;MsG0480020241.01;MsG0580028560.01;MsG0880043235.01;MsG0280010144.01;MsG0280008262.01;MsG0780036854.01;MsG0780039593.01;MsG0880044394.01;MsG0680034959.01;MsG0480021653.01;MsG0380013052.01;MsG0880046148.01;MsG03800…
cellular_component	supramolecular complex	GO:0099080	35	0.00791497060154(35/4422)	MsG0880043452.01;MsG0780040365.01;MsG0180000314.01;MsG0880046378.01;MsG0580024787.01;MsG0380013855.01;MsG0780038736.01;MsG0480018448.01;MsG0380017858.01;MsG0780039224.01;MsG0380017708.01;MsG0480022991.01;MsG0880042414.01;MsG0180005741.01;MsG0680035878.01;MsG0880046646.01;MsG0680030949.01;MsG0780040472.01;MsG0280007990.01;MsG0880044437.01;MsG0280006563.01;MsG0780041232.01;MsG0480022992.01;MsG08800…	35	0.00773480662983(35/4525)	MsG0880043452.01;MsG0780040365.01;MsG0180000314.01;MsG0880046378.01;MsG0580024787.01;MsG0380013855.01;MsG0780038736.01;MsG0480018448.01;MsG0380017858.01;MsG0780039224.01;MsG0380017708.01;MsG0480022991.01;MsG0880042414.01;MsG0180005741.01;MsG0680035878.01;MsG0880046646.01;MsG0680030949.01;MsG0780040472.01;MsG0280007990.01;MsG0880044437.01;MsG0280006563.01;MsG0780041232.01;MsG0480022992.01;MsG08800…	14	0.00641907381935(14/2181)	MsG0380017858.01;MsG0780040472.01;MsG0480022991.01;MsG0880042090.01;MsG0780039224.01;MsG0880046072.01;MsG0380017708.01;MsG0780040365.01;MsG0180000314.01;MsG0580029881.01;MsG0880042413.01;MsG0780041212.01;MsG0880046378.01;MsG0180005741.01
molecular_function	translation regulator activity	GO:0045182	24	0.00542740841248(24/4422)	MsG0680035845.01;MsG0080048687.01;MsG0280007595.01;MsG0380016889.01;MsG0380013995.01;MsG0280010751.01;MsG0780040366.01;MsG0280011149.01;MsG0080048623.01;MsG0680034421.01;MsG0880046499.01;MsG0680031678.01;MsG0680035716.01;MsG0280009667.01;MsG0880047208.01;MsG0180000068.01;MsG0880042338.01;MsG0780040471.01;MsG0680035721.01;MsG0880047310.01;MsG0880042619.01;MsG0680035711.01;MsG0680035722.01;MsG00800…	25	0.00552486187845(25/4525)	MsG0680035845.01;MsG0080048687.01;MsG0280007595.01;MsG0380016889.01;MsG0380013995.01;MsG0280010751.01;MsG0780040366.01;MsG0280011149.01;MsG0080048623.01;MsG0680034421.01;MsG0880046499.01;MsG0680031678.01;MsG0680035716.01;MsG0280009667.01;MsG0880047208.01;MsG0180000068.01;MsG0880042338.01;MsG0780040471.01;MsG0680035721.01;MsG0780040598.01;MsG0880047310.01;MsG0880042619.01;MsG0680035711.01;MsG06800…	12	0.00550206327373(12/2181)	MsG0480018412.01;MsG0380013995.01;MsG0280009667.01;MsG0580025356.01;MsG0280010751.01;MsG0880044658.01;MsG0880046615.01;MsG0480020392.01;MsG0680030962.01;MsG0880042619.01;MsG0280010389.01;MsG0180001837.01
molecular_function	transcription regulator activity	GO:0140110	220	0.0497512437811(220/4422)	MsG0280009128.01;MsG0180004492.01;MsG0180000284.01;MsG0380017368.01;MsG0380017087.01;MsG0180000525.01;MsG0480023063.01;MsG0580026196.01;MsG0380017380.01;MsG0880047415.01;MsG0880046123.01;MsG0580027951.01;MsG0580029417.01;MsG0480023383.01;MsG0380017048.01;MsG0380017248.01;MsG0580028560.01;MsG0480021020.01;MsG0280008601.01;MsG0380017632.01;MsG0480020708.01;MsG0180004009.01;MsG0580028611.01;MsG01800…	223	0.0492817679558(223/4525)	MsG0280009128.01;MsG0180004492.01;MsG0180000284.01;MsG0380017368.01;MsG0380017087.01;MsG0180000525.01;MsG0480023063.01;MsG0580026196.01;MsG0380017380.01;MsG0880047415.01;MsG0880046123.01;MsG0580027951.01;MsG0580029417.01;MsG0480023383.01;MsG0380017048.01;MsG0380017248.01;MsG0580028560.01;MsG0480021020.01;MsG0280008601.01;MsG0380017632.01;MsG0480020708.01;MsG0180004009.01;MsG0580028611.01;MsG01800…	114	0.0522696011004(114/2181)	MsG0380017380.01;MsG0180000284.01;MsG0580029539.01;MsG0480020539.01;MsG0380017248.01;MsG0580028560.01;MsG0380017149.01;MsG0280011042.01;MsG0580028611.01;MsG0180005090.01;MsG0880043078.01;MsG0180005127.01;MsG0280009550.01;MsG0580029933.01;MsG0480023063.01;MsG0480020860.01;MsG0880046129.01;MsG0480022400.01;MsG0680030964.01;MsG0180006038.01;MsG0180003830.01;MsG0180000404.01;MsG0280008093.01;MsG04800…
molecular_function	structural molecule activity	GO:0005198	79	0.0178652193578(79/4422)	MsG0180005741.01;MsG0680032026.01;MsG0480022041.01;MsG0380013950.01;MsG0380013970.01;MsG0780039228.01;MsG0480021301.01;MsG0480020185.01;MsG0780041535.01;MsG0780040620.01;MsG0680031467.01;MsG0780036534.01;MsG0480023428.01;MsG0180005061.01;MsG0480021252.01;MsG0880044444.01;MsG0080049080.01;MsG0080049078.01;MsG0380013959.01;MsG0480022307.01;MsG0380015596.01;MsG0680035732.01;MsG0180005130.01;MsG00800…	84	0.0185635359116(84/4525)	MsG0180005048.01;MsG0180004727.01;MsG0180005741.01;MsG0680032026.01;MsG0480022041.01;MsG0380013950.01;MsG0380013970.01;MsG0780039228.01;MsG0480021301.01;MsG0480020185.01;MsG0780041535.01;MsG0780040620.01;MsG0280010232.01;MsG0680031467.01;MsG0780036534.01;MsG0480023428.01;MsG0180005061.01;MsG0480021252.01;MsG0880044444.01;MsG0080049080.01;MsG0080049078.01;MsG0380013959.01;MsG0480022307.01;MsG03800…	17	0.00779458963778(17/2181)	MsG0580028107.01;MsG0180004377.01;MsG0480019325.01;MsG0380017858.01;MsG0780040472.01;MsG0380013995.01;MsG0180004607.01;MsG0380013970.01;MsG0580024139.01;MsG0480019322.01;MsG0380017708.01;MsG0580027777.01;MsG0780040365.01;MsG0380015596.01;MsG0180005361.01;MsG0380013949.01;MsG0180005741.01
molecular_function	protein folding chaperone	GO:0044183	7	0.00158299412031(7/4422)	MsG0280008285.01;MsG0680031848.01;MsG0880047581.01;MsG0280008341.01;MsG0280008340.01;MsG0480020939.01;MsG0380014646.01	7	0.00154696132597(7/4525)	MsG0280008285.01;MsG0680031848.01;MsG0880047581.01;MsG0280008341.01;MsG0280008340.01;MsG0480020939.01;MsG0380014646.01	4	0.00183402109124(4/2181)	MsG0680031848.01;MsG0880047581.01;MsG0480020939.01;MsG0380014646.01
molecular_function	molecular carrier activity	GO:0140104	4	0.000904568068747(4/4422)	MsG0080047803.01;MsG0880046991.01;MsG0380016968.01;MsG0780038455.01	4	0.000883977900552(4/4525)	MsG0080047803.01;MsG0880046991.01;MsG0380016968.01;MsG0780038455.01	2	0.000917010545621(2/2181)	MsG0080047803.01;MsG0780038455.01
molecular_function	antioxidant activity	GO:0016209	51	0.0115332428765(51/4422)	MsG0680030615.01;MsG0580024758.01;MsG0180004326.01;MsG0580028712.01;MsG0480021518.01;MsG0380017351.01;MsG0180004768.01;MsG0680030631.01;MsG0280010617.01;MsG0180004596.01;MsG0480019345.01;MsG0180004941.01;MsG0780041537.01;MsG0580027754.01;MsG0480019346.01;MsG0180002545.01;MsG0480019344.01;MsG0180004895.01;MsG0180004942.01;MsG0180004202.01;MsG0280007688.01;MsG0680030613.01;MsG0780038722.01;MsG08800…	53	0.0117127071823(53/4525)	MsG0680030615.01;MsG0580024758.01;MsG0580025191.01;MsG0180004326.01;MsG0580028712.01;MsG0480021518.01;MsG0380017351.01;MsG0180004768.01;MsG0680030631.01;MsG0280010617.01;MsG0180004596.01;MsG0480019345.01;MsG0180004941.01;MsG0780041537.01;MsG0580027754.01;MsG0480019346.01;MsG0180002545.01;MsG0480019344.01;MsG0180004895.01;MsG0180004942.01;MsG0180004202.01;MsG0280007688.01;MsG0680030613.01;MsG07800…	20	0.00917010545621(20/2181)	MsG0880047645.01;MsG0580024758.01;MsG0680030615.01;MsG0780040592.01;MsG0380017351.01;MsG0180004941.01;MsG0580025191.01;MsG0480019346.01;MsG0480019348.01;MsG0380017883.01;MsG0180004895.01;MsG0080049023.01;MsG0180004202.01;MsG0480021518.01;MsG0180004942.01;MsG0180006192.01;MsG0680030631.01;MsG0880047450.01;MsG0280010617.01;MsG0780037235.01
molecular_function	transporter activity	GO:0005215	283	0.0639981908639(283/4422)	MsG0280007098.01;MsG0180004068.01;MsG0780038323.01;MsG0780040679.01;MsG0780037917.01;MsG0480022700.01;MsG0680031057.01;MsG0380016975.01;MsG0480022699.01;MsG0480021198.01;MsG0180004492.01;MsG0180001868.01;MsG0480022920.01;MsG0480023044.01;MsG0480022861.01;MsG0880042765.01;MsG0280008260.01;MsG0280011026.01;MsG0480018890.01;MsG0380016022.01;MsG0880047613.01;MsG0580025262.01;MsG0480020323.01;MsG08800…	286	0.0632044198895(286/4525)	MsG0280007098.01;MsG0180004068.01;MsG0780038323.01;MsG0780040679.01;MsG0780037917.01;MsG0480022700.01;MsG0680031057.01;MsG0380016975.01;MsG0480022699.01;MsG0480021198.01;MsG0280011290.01;MsG0180001868.01;MsG0480022920.01;MsG0480023044.01;MsG0480022861.01;MsG0880042765.01;MsG0280008260.01;MsG0280011026.01;MsG0480018890.01;MsG0380016022.01;MsG0880047613.01;MsG0580025262.01;MsG0480020323.01;MsG08800…	150	0.0687757909216(150/2181)	MsG0280007098.01;MsG0480022700.01;MsG0680035897.01;MsG0380016975.01;MsG0480023578.01;MsG0280011290.01;MsG0480023044.01;MsG0480022861.01;MsG0880042765.01;MsG0080048940.01;MsG0780041589.01;MsG0480018890.01;MsG0580025262.01;MsG0680035899.01;MsG0880043235.01;MsG0680031057.01;MsG0180003146.01;MsG0880044311.01;MsG0280011276.01;MsG0380015556.01;MsG0780039188.01;MsG0880043656.01;MsG0680030719.01;MsG02800…
molecular_function	toxin activity	GO:0090729	7	0.00158299412031(7/4422)	MsG0380012938.01;MsG0780037244.01;MsG0380013239.01;MsG0780038054.01;MsG0380013212.01;MsG0380013214.01;MsG0380013213.01	7	0.00154696132597(7/4525)	MsG0380012938.01;MsG0780037244.01;MsG0380013239.01;MsG0780038054.01;MsG0380013212.01;MsG0380013214.01;MsG0380013213.01	1	0.000458505272811(1/2181)	MsG0380015279.01
molecular_function	molecular function regulator	GO:0098772	93	0.0210312075984(93/4422)	MsG0380015340.01;MsG0380016261.01;MsG0680035382.01;MsG0480019215.01;MsG0280007908.01;MsG0280007911.01;MsG0180000340.01;MsG0180000988.01;MsG0280009899.01;MsG0380016521.01;MsG0380014293.01;MsG0880046227.01;MsG0380014666.01;MsG0680034391.01;MsG0380017673.01;MsG0180004110.01;MsG0780037961.01;MsG0680034417.01;MsG0280009654.01;MsG0480021751.01;MsG0780041317.01;MsG0780039681.01;MsG0880043876.01;MsG01800…	95	0.0209944751381(95/4525)	MsG0380015340.01;MsG0380016261.01;MsG0680035382.01;MsG0480019215.01;MsG0280007908.01;MsG0280007911.01;MsG0180000340.01;MsG0180000988.01;MsG0280009899.01;MsG0380016521.01;MsG0380014293.01;MsG0880046227.01;MsG0380014666.01;MsG0680034391.01;MsG0380017673.01;MsG0180004110.01;MsG0780037961.01;MsG0680034417.01;MsG0280009654.01;MsG0480021751.01;MsG0780041317.01;MsG0780039681.01;MsG0880043876.01;MsG01800…	44	0.0201742320037(44/2181)	MsG0680034313.01;MsG0380016261.01;MsG0880042944.01;MsG0280011409.01;MsG0380016816.01;MsG0380015378.01;MsG0580025846.01;MsG0380017397.01;MsG0280007908.01;MsG0280007911.01;MsG0480023406.01;MsG0280007922.01;MsG0380015520.01;MsG0580024488.01;MsG0280010240.01;MsG0180001109.01;MsG0280007910.01;MsG0480019644.01;MsG0380016521.01;MsG0580025558.01;MsG0180001164.01;MsG0280007479.01;MsG0680032617.01;MsG06800…
molecular_function	small molecule sensor activity	GO:0140299	5	0.00113071008593(5/4422)	MsG0580025117.01;MsG0180004712.01;MsG0280008743.01;MsG0880045617.01;MsG0180005002.01	5	0.00110497237569(5/4525)	MsG0580025117.01;MsG0180004712.01;MsG0280008743.01;MsG0880045617.01;MsG0180005002.01	1	0.000458505272811(1/2181)	MsG0580025117.01
molecular_function	binding	GO:0005488	2537	0.573722297603(2537/4422)	MsG0680030699.01;MsG0480022530.01;MsG0880046030.01;MsG0680033015.01;MsG0180006012.01;MsG0480019532.01;MsG0480019077.01;MsG0180003210.01;MsG0780039263.01;MsG0480021554.01;MsG0780039078.01;MsG0280009642.01;MsG0380015016.01;MsG0580029417.01;MsG0380016398.01;MsG0280010830.01;MsG0780040671.01;MsG0680031814.01;MsG0380015812.01;MsG0580025234.01;MsG0880045386.01;MsG0480020241.01;MsG0580028560.01;MsG02800…
sG0180000156.01;MsG0180003633.01;MsG0580025869.01;MsG0580027733.01;MsG0680034720.01;MsG0380015209.01;MsG0480023345.01;MsG0180000936.01;MsG0180005839.01;MsG0380015653.01;MsG0380012808.01;MsG0380012344.01;MsG0080048451.01;MsG0480023525.01;MsG0580024157.01;MsG0380012438.01;MsG0380016515.01;MsG0880045336.01;MsG0280010617.01;MsG0480023903.01;MsG0380011883.01;MsG0280009859.01;MsG0780040656.01;MsG018000…	2603	0.575248618785(2603/4525)	MsG0680030699.01;MsG0480019532.01;MsG0880046030.01;MsG0680033015.01;MsG0180006012.01;MsG0480022530.01;MsG0480019077.01;MsG0180003210.01;MsG0780039263.01;MsG0480021554.01;MsG0780039078.01;MsG0280009642.01;MsG0380015016.01;MsG0580029417.01;MsG0380016398.01;MsG0280010830.01;MsG0780040671.01;MsG0680031814.01;MsG0380015812.01;MsG0580025234.01;MsG0880045386.01;MsG0480020241.01;MsG0580028560.01;MsG02800…
sG0280008719.01;MsG0780040430.01;MsG0880042288.01;MsG0780039333.01;MsG0580027854.01;MsG0880045818.01;MsG0680034635.01;MsG0780040173.01;MsG0380016190.01;MsG0180005334.01;MsG0780039847.01;MsG0480020740.01;MsG0880042988.01;MsG0180001119.01;MsG0580028496.01;MsG0580028605.01;MsG0380014048.01;MsG0180006020.01;MsG0580027233.01;MsG0780040507.01;MsG0180000105.01;MsG0880045610.01;MsG0880046263.01;MsG018000…	1124	0.515359926639(1124/2181)	MsG0780038684.01;MsG0780040752.01;MsG0480022530.01;MsG0380013770.01;MsG0680030991.01;MsG0680033971.01;MsG0680031150.01;MsG0380013970.01;MsG0280008246.01;MsG0180001258.01;MsG0280009667.01;MsG0180003210.01;MsG0480021554.01;MsG0680034993.01;MsG0380015016.01;MsG0780038922.01;MsG0280010830.01;MsG0580025683.01;MsG0180004774.01;MsG0680031814.01;MsG0180004924.01;MsG0580030029.01;MsG0380017248.01;MsG04800…
molecular_function	nutrient reservoir activity	GO:0045735	28	0.00633197648123(28/4422)	MsG0380012938.01;MsG0780040747.01;MsG0480018356.01;MsG0480018697.01;MsG0380015283.01;MsG0480018693.01;MsG0180000252.01;MsG0880042734.01;MsG0180003954.01;MsG0680030382.01;MsG0880042317.01;MsG0780037244.01;MsG0780039812.01;MsG0680030379.01;MsG0080048426.01;MsG0780038054.01;MsG0380013212.01;MsG0380013239.01;MsG0880042455.01;MsG0480023195.01;MsG0180004424.01;MsG0580024943.01;MsG0080048652.01;MsG07800…	29	0.00640883977901(29/4525)	MsG0380012938.01;MsG0780040747.01;MsG0480018356.01;MsG0480018697.01;MsG0380015283.01;MsG0480018693.01;MsG0180000252.01;MsG0180003954.01;MsG0680030382.01;MsG0380013213.01;MsG0780037244.01;MsG0880042317.01;MsG0780039812.01;MsG0680030379.01;MsG0480020833.01;MsG0780038054.01;MsG0380013212.01;MsG0380013239.01;MsG0880042455.01;MsG0480023195.01;MsG0180004424.01;MsG0580024943.01;MsG0080048652.01;MsG07800…	14	0.00641907381935(14/2181)	MsG0380015279.01;MsG0580024943.01;MsG0780039812.01;MsG0680030379.01;MsG0780040747.01;MsG0480018697.01;MsG0380015283.01;MsG0680030380.01;MsG0180005588.01;MsG0480018693.01;MsG0180000252.01;MsG0680030382.01;MsG0180003954.01;MsG0180004424.01
molecular_function	protein tag	GO:0031386	1	0.000226142017187(1/4422)	MsG0480022347.01	1	0.000220994475138(1/4525)	MsG0480022347.01	0	0	none
molecular_function	molecular transducer activity	GO:0060089	83	0.0187697874265(83/4422)	MsG0580025558.01;MsG0180005373.01;MsG0480021885.01;MsG0380011989.01;MsG0880045929.01;MsG0780038836.01;MsG0380015931.01;MsG0480022607.01;MsG0380016515.01;MsG0280010737.01;MsG0580028051.01;MsG0280007915.01;MsG0480023945.01;MsG0380017672.01;MsG0580029429.01;MsG0880045927.01;MsG0780036634.01;MsG0780036626.01;MsG0780038825.01;MsG0280007922.01;MsG0180000151.01;MsG0280010714.01;MsG0580029430.01;MsG07800…	83	0.0183425414365(83/4525)	MsG0580025558.01;MsG0180005373.01;MsG0480021885.01;MsG0380011989.01;MsG0880045929.01;MsG0780038836.01;MsG0380015931.01;MsG0480022607.01;MsG0380016515.01;MsG0280010737.01;MsG0580028051.01;MsG0280007915.01;MsG0480023945.01;MsG0380017672.01;MsG0580029429.01;MsG0880045927.01;MsG0780036634.01;MsG0780036626.01;MsG0780038825.01;MsG0280007922.01;MsG0180000151.01;MsG0280010714.01;MsG0580029430.01;MsG07800…	35	0.0160476845484(35/2181)	MsG0580025558.01;MsG0480022607.01;MsG0280007908.01;MsG0580028051.01;MsG0480023945.01;MsG0280010269.01;MsG0880045929.01;MsG0280007911.01;MsG0280007922.01;MsG0180001109.01;MsG0280007910.01;MsG0780040509.01;MsG0380015520.01;MsG0380016398.01;MsG0680033964.01;MsG0680030558.01;MsG0780038829.01;MsG0180002988.01;MsG0280008936.01;MsG0480022608.01;MsG0780037281.01;MsG0480020872.01;MsG0280007909.01;MsG06800…
molecular_function	catalytic activity	GO:0003824	2437	0.551108095884(2437/4422)	MsG0680030699.01;MsG0480022530.01;MsG0580024343.01;MsG0880046030.01;MsG0680033015.01;MsG0480019532.01;MsG0180003210.01;MsG0480021554.01;MsG0780039078.01;MsG0380015016.01;MsG0380015812.01;MsG0580025234.01;MsG0480020241.01;MsG0280009691.01;MsG0280008262.01;MsG0780036854.01;MsG0880047656.01;MsG0480020814.01;MsG0380016195.01;MsG0880047233.01;MsG0480022534.01;MsG0880046180.01;MsG0780037741.01;MsG05800…
sG0480022535.01;MsG0680035455.01;MsG0080048845.01;MsG0780038923.01;MsG0380012628.01;MsG0880045624.01;MsG0780035917.01;MsG0880042495.01;MsG0180004752.01;MsG0380013118.01;MsG0880042072.01;MsG0880047658.01;MsG0480020784.01;MsG0380016287.01;MsG0580029362.01;MsG0680030866.01;MsG0680034618.01;MsG0380013840.01;MsG0280006725.01;MsG0180002912.01;MsG0180002218.01;MsG0880043665.01;MsG0180001124.01;MsG018000…	2502	0.552928176796(2502/4525)	MsG0680030699.01;MsG0480019532.01;MsG0580024343.01;MsG0880046030.01;MsG0680033015.01;MsG0480022530.01;MsG0180003210.01;MsG0480021554.01;MsG0780039078.01;MsG0380015016.01;MsG0380015812.01;MsG0580025234.01;MsG0480020241.01;MsG0580029224.01;MsG0280009691.01;MsG0280008262.01;MsG0780036854.01;MsG0880047656.01;MsG0480020814.01;MsG0380016195.01;MsG0880047233.01;MsG0480022534.01;MsG0880046180.01;MsG07800…
sG0380017262.01;MsG0480021636.01;MsG0880045677.01;MsG0180004927.01;MsG0280010482.01;MsG0080047993.01;MsG0180003248.01;MsG0280007595.01;MsG0180005065.01;MsG0680034040.01;MsG0380011885.01;MsG0180004941.01;MsG0880047004.01;MsG0380017032.01;MsG0580024202.01;MsG0180000431.01;MsG0580026051.01;MsG0380016644.01;MsG0180005018.01;MsG0080048717.01;MsG0780039574.01;MsG0480023388.01;MsG0280007216.01;MsG048002…	1197	0.548830811554(1197/2181)	MsG0780038684.01;MsG0780040752.01;MsG0480022530.01;MsG0380012622.01;MsG0380013770.01;MsG0680030991.01;MsG0680033971.01;MsG0280011044.01;MsG0280008246.01;MsG0580027880.01;MsG0180001258.01;MsG0180003210.01;MsG0680034647.01;MsG0480021554.01;MsG0780037235.01;MsG0380015016.01;MsG0780038922.01;MsG0480021897.01;MsG0880042556.01;MsG0380014869.01;MsG0380014605.01;MsG0180004774.01;MsG0180004924.01;MsG05800…
