# Supplementary material for: Transcriptomic Analysis to Identify Melatonin-mediated Salt-responsive Genes During the Germinated Stage of Alfalfa
Source: Preprints.org preprint supplement (doi:10.20944/preprints202403.0648.v1), 2024-03-12
Supplement: Supplementary file 4 [file Table S4.xlsx]

## Sheet: ZMNvsZMCK
Supplemental table S4. The KEGG PATHWAY enrichment of ZMNvsZMCK gene concentration was analyzed using R script
#Study_num	Term	Database	ID	Ratio_in_study	Ratio_in_pop	P-Value	Corrected P-Value	Genes	Hyperlink	typeII	typeI
21	Isoflavonoid biosynthesis	KEGG PATHWAY	map00943	21/825	63/18577	1.45e-13	1.64e-11	MsG0480021255.01|MsG0380014439.01|MsG0780036582.01|MsG0880045930.01|MsG0480022309.01|MsG0780040613.01|MsG0580024986.01|MsG0580024116.01|MsG0480021549.01|MsG0480022835.01|MsG0780036575.01|MsG0480022833.01|MsG0780040612.01|MsG0180005648.01|MsG0780039576.01|MsG0780040610.01|MsG0480022310.01|MsG0780040611.01|MsG0580024990.01|MsG0480022308.01|MsG0480022311.01	http://www.genome.jp/kegg-bin/show_pathway?map=map00943&multi_query=K13262+white,blue%0d%0aK13260+white,blue%0d%0aK13267+white,blue%0d%0aK13266+white,blue%0d%0aK13265+white,blue%0d%0aK13258+white,blue%0d%0aK25075+white,blue%0d%0aK13259+white,blue%0d%0aK13257+white,blue%0d%0aK05281+white,blue%0d%0a	Biosynthesis of other secondary metabolites	Metabolism
21	Flavonoid biosynthesis	KEGG PATHWAY	map00941	21/825	104/18577	4.78e-09	2.7e-07	MsG0880045634.01|MsG0380013835.01|MsG0880045881.01|MsG0180005357.01|MsG0380012607.01|MsG0780036661.01|MsG0380016129.01|MsG0080048347.01|MsG0580024263.01|MsG0580024260.01|MsG0380016128.01|MsG0380013409.01|MsG0480022555.01|MsG0580028603.01|MsG0080048348.01|MsG0080048345.01|MsG0080048352.01|MsG0180005356.01|MsG0180005358.01|MsG0380012606.01|MsG0180006187.01	http://www.genome.jp/kegg-bin/show_pathway?map=map00941&multi_query=K13065+white,red%0d%0aK08695+white,red%0d%0aK13083+white,blue%0d%0aK01859+white,blue%0d%0aK00660+white,blue%0d%0aK00588+white,blue%0d%0aK00487+white,blue%0d%0aK05280+white,blue%0d%0a	Biosynthesis of other secondary metabolites	Metabolism
34	Starch and sucrose metabolism	KEGG PATHWAY	map00500	34/825	289/18577	2.29e-07	8.61e-06	MsG0180004376.01|MsG0480021718.01|MsG0280007216.01|MsG0380011756.01|MsG0380017023.01|MsG0180004835.01|MsG0180000436.01|MsG0380014678.01|MsG0480021114.01|MsG0480021120.01|MsG0480021135.01|MsG0680034970.01|MsG0680034833.01|MsG0880047658.01|MsG0180000685.01|MsG0380011674.01|MsG0480023682.01|MsG0880046084.01|MsG0680034969.01|MsG0580029719.01|MsG0880047531.01|MsG0880045651.01|MsG0880041965.01|MsG04800…	http://www.genome.jp/kegg-bin/show_pathway?map=map00500&multi_query=K13679+white,red%0d%0aK19893+white,blue%0d%0aK01177+white,pink%0d%0aK01179+white,pink%0d%0aK16055+white,blue%0d%0aK19891+white,red%0d%0aK00705+white,red%0d%0aK00688+white,red%0d%0aK05350+white,blue%0d%0aK01214+white,red%0d%0aK01188+white,pink%0d%0aK01193+white,pink%0d%0aK00696+white,pink%0d%0aK01087+white,blue%0d%0a	Carbohydrate metabolism	Metabolism
15	Tropane, piperidine and pyridine alkaloid biosynthesis	KEGG PATHWAY	map00960	15/825	71/18577	4.06e-07	1.15e-05	MsG0380015350.01|MsG0080048347.01|MsG0080048352.01|MsG0180005357.01|MsG0780036661.01|MsG0380016129.01|MsG0580024263.01|MsG0580024260.01|MsG0180005358.01|MsG0380016128.01|MsG0080048345.01|MsG0180005356.01|MsG0080048348.01|MsG0780041217.01|MsG0880045289.01	http://www.genome.jp/kegg-bin/show_pathway?map=map00960&multi_query=K00276+white,blue%0d%0aK15849+white,blue%0d%0aK08081+white,red%0d%0aK00660+white,blue%0d%0a	Biosynthesis of other secondary metabolites	Metabolism
14	Circadian rhythm - plant	KEGG PATHWAY	map04712	14/825	70/18577	1.98e-06	4.48e-05	MsG0080048347.01|MsG0080048352.01|MsG0180005357.01|MsG0780041428.01|MsG0380016128.01|MsG0380016129.01|MsG0780036661.01|MsG0580024263.01|MsG0580024260.01|MsG0480023945.01|MsG0180005358.01|MsG0080048348.01|MsG0080048345.01|MsG0180005356.01	http://www.genome.jp/kegg-bin/show_pathway?map=map04712&multi_query=K12116+white,red%0d%0aK12126+white,red%0d%0aK00660+white,blue%0d%0a	Environmental adaptation	Organismal Systems
17	Cyanoamino acid metabolism	KEGG PATHWAY	map00460	17/825	102/18577	2.38e-06	4.49e-05	MsG0680034970.01|MsG0680034969.01|MsG0480021120.01|MsG0480021135.01|MsG0480021114.01|MsG0880044869.01|MsG0180000295.01|MsG0380017168.01|MsG0480021131.01|MsG0780039711.01|MsG0680034974.01|MsG0180000296.01|MsG0380012654.01|MsG0480021117.01|MsG0480021132.01|MsG0780039254.01|MsG0280007216.01	http://www.genome.jp/kegg-bin/show_pathway?map=map00460&multi_query=K01188+white,pink%0d%0aK13034+white,blue%0d%0aK05350+white,blue%0d%0aK13051+white,blue%0d%0a	Metabolism of other amino acids	Metabolism
17	Biosynthesis of various plant secondary metabolites	KEGG PATHWAY	map00999	17/825	109/18577	6.06e-06	8.56e-05	MsG0680034970.01|MsG0680034969.01|MsG0480021114.01|MsG0480021135.01|MsG0480021357.01|MsG0680034730.01|MsG0880045441.01|MsG0480021120.01|MsG0480021131.01|MsG0480021361.01|MsG0780040990.01|MsG0380012654.01|MsG0480021117.01|MsG0480021132.01|MsG0780039254.01|MsG0280007216.01|MsG0680034974.01	http://www.genome.jp/kegg-bin/show_pathway?map=map00999&multi_query=K21568+white,blue%0d%0aK01188+white,pink%0d%0aK05350+white,blue%0d%0aK00789+white,red%0d%0aK22374+white,pink%0d%0a	Biosynthesis of other secondary metabolites	Metabolism
29	Phenylpropanoid biosynthesis	KEGG PATHWAY	map00940	29/825	261/18577	5.5e-06	8.88e-05	MsG0780040942.01|MsG0580024758.01|MsG0580024256.01|MsG0380013835.01|MsG0180003542.01|MsG0580028603.01|MsG0880045664.01|MsG0380017351.01|MsG0680030631.01|MsG0480019348.01|MsG0880045634.01|MsG0480019346.01|MsG0180004855.01|MsG0280010617.01|MsG0180004202.01|MsG0880047450.01|MsG0780037235.01|MsG0580025191.01|MsG0880045881.01|MsG0780040592.01|MsG0780040943.01|MsG0180006192.01|MsG0380015696.01|MsG02800…	http://www.genome.jp/kegg-bin/show_pathway?map=map00940&multi_query=K13065+white,red%0d%0aK10775+white,blue%0d%0aK00083+white,red%0d%0aK01904+white,pink%0d%0aK09755+white,blue%0d%0aK00430+white,pink%0d%0aK18368+white,red%0d%0aK00487+white,blue%0d%0aK00588+white,blue%0d%0aK09753+white,blue%0d%0a	Biosynthesis of other secondary metabolites	Metabolism
35	Plant hormone signal transduction	KEGG PATHWAY	map04075	35/825	434/18577	0.000511015	0.00577447	MsG0580025558.01|MsG0880047408.01|MsG0780040694.01|MsG0780041428.01|MsG0780038810.01|MsG0480020539.01|MsG0380016587.01|MsG0780040698.01|MsG0280006552.01|MsG0280007934.01|MsG0180003836.01|MsG0480023807.01|MsG0280010515.01|MsG0280006553.01|MsG0880043041.01|MsG0480021454.01|MsG0180004876.01|MsG0380015520.01|MsG0380016628.01|MsG0480019218.01|MsG0780039188.01|MsG0380017164.01|MsG0080048230.01|MsG02800…	http://www.genome.jp/kegg-bin/show_pathway?map=map04075&multi_query=K14486+white,red%0d%0aK14506+white,red%0d%0aK14484+white,red%0d%0aK14504+white,pink%0d%0aK14491+white,blue%0d%0aK14432+white,red%0d%0aK14431+white,blue%0d%0aK14487+white,blue%0d%0aK14497+white,red%0d%0aK14488+white,blue%0d%0aK14496+white,blue%0d%0aK12126+white,red%0d%0aK13449+white,blue%0d%0aK13946+white,red%0d%0aK14505+white,red…	Signal transduction	Environmental Information Processing
18	ABC transporters	KEGG PATHWAY	map02010	18/825	168/18577	0.000497	0.00624011	MsG0880047256.01|MsG0680035771.01|MsG0280011350.01|MsG0680030679.01|MsG0680030656.01|MsG0880047233.01|MsG0880042368.01|MsG0880046889.01|MsG0180004869.01|MsG0480021815.01|MsG0680035772.01|MsG0580028406.01|MsG0480021563.01|MsG0180003146.01|MsG0280011349.01|MsG0680030746.01|MsG0880047259.01|MsG0380011824.01	http://www.genome.jp/kegg-bin/show_pathway?map=map02010&multi_query=K05666+white,blue%0d%0aK05681+white,pink%0d%0aK05658+white,pink%0d%0aK08711+white,blue%0d%0a	Membrane transport	Environmental Information Processing
9	Cutin, suberine and wax biosynthesis	KEGG PATHWAY	map00073	9/825	61/18577	0.00140188	0.0144011	MsG0480023656.01|MsG0480023588.01|MsG0480020560.01|MsG0580028023.01|MsG0180001537.01|MsG0880042019.01|MsG0180001531.01|MsG0380014734.01|MsG0180005039.01	http://www.genome.jp/kegg-bin/show_pathway?map=map00073&multi_query=K13356+white,red%0d%0aK15404+white,red%0d%0aK15401+white,blue%0d%0aK15400+white,red%0d%0aK15402+white,blue%0d%0aK15398+white,red%0d%0aK21995+white,red%0d%0a	Lipid metabolism	Metabolism
18	Glutathione metabolism	KEGG PATHWAY	map00480	18/825	186/18577	0.00162414	0.015294	MsG0580024232.01|MsG0780038939.01|MsG0480023640.01|MsG0780038930.01|MsG0580029682.01|MsG0780037751.01|MsG0180004941.01|MsG0780038923.01|MsG0680034195.01|MsG0380017037.01|MsG0180004942.01|MsG0180004880.01|MsG0280009764.01|MsG0780038922.01|MsG0780038925.01|MsG0380015008.01|MsG0180004879.01|MsG0480018904.01	http://www.genome.jp/kegg-bin/show_pathway?map=map00480&multi_query=K00036+white,blue%0d%0aK01919+white,blue%0d%0aK00799+white,blue%0d%0a	Metabolism of other amino acids	Metabolism
11	Galactose metabolism	KEGG PATHWAY	map00052	11/825	101/18577	0.00517891	0.0390145	MsG0180000436.01|MsG0880043600.01|MsG0580030022.01|MsG0680030354.01|MsG0180000437.01|MsG0780041389.01|MsG0180000438.01|MsG0880041965.01|MsG0580030055.01|MsG0880047773.01|MsG0880046816.01	http://www.genome.jp/kegg-bin/show_pathway?map=map00052&multi_query=K01193+white,pink%0d%0aK01190+white,red%0d%0aK01784+white,blue%0d%0aK18819+white,blue%0d%0aK06617+white,pink%0d%0a	Carbohydrate metabolism	Metabolism
7	Sulfur metabolism	KEGG PATHWAY	map00920	7/825	49/18577	0.00560516	0.0395864	MsG0280006605.01|MsG0480021690.01|MsG0180005544.01|MsG0480022482.01|MsG0380016148.01|MsG0780039711.01|MsG0180005607.01	http://www.genome.jp/kegg-bin/show_pathway?map=map00920&multi_query=K00640+white,blue%0d%0aK13811+white,blue%0d%0aK17285+white,red%0d%0aK13034+white,blue%0d%0aK01082+white,blue%0d%0aK01738+white,red%0d%0a	Energy metabolism	Metabolism
5	Vitamin B6 metabolism	KEGG PATHWAY	map00750	5/825	26/18577	0.00515687	0.0416233	MsG0280011229.01|MsG0280006942.01|MsG0280011228.01|MsG0580024656.01|MsG0780036221.01	http://www.genome.jp/kegg-bin/show_pathway?map=map00750&multi_query=K06215+white,blue%0d%0aK13248+white,blue%0d%0a	Metabolism of cofactors and vitamins	Metabolism
11	alpha-Linolenic acid metabolism	KEGG PATHWAY	map00592	11/825	100/18577	0.00480215	0.0417417	MsG0880047061.01|MsG0580024176.01|MsG0380012400.01|MsG0580024178.01|MsG0680030615.01|MsG0780040405.01|MsG0580027261.01|MsG0480023340.01|MsG0480019593.01|MsG0280010584.01|MsG0480019594.01	http://www.genome.jp/kegg-bin/show_pathway?map=map00592&multi_query=K05894+white,blue%0d%0aK00232+white,blue%0d%0aK10525+white,red%0d%0aK10527+white,red%0d%0aK10528+white,blue%0d%0aK10529+white,red%0d%0aK14674+white,blue%0d%0aK00224+white,blue%0d%0a	Lipid metabolism	Metabolism
9	Fatty acid degradation	KEGG PATHWAY	map00071	9/825	82/18577	0.0104052	0.0691643	MsG0880047061.01|MsG0180001085.01|MsG0480019997.01|MsG0580028023.01|MsG0380014734.01|MsG0380017016.01|MsG0480023340.01|MsG0780036946.01|MsG0180004774.01	http://www.genome.jp/kegg-bin/show_pathway?map=map00071&multi_query=K00232+white,blue%0d%0aK15401+white,blue%0d%0aK10527+white,red%0d%0aK01897+white,red%0d%0aK00121+white,blue%0d%0aK07517+white,blue%0d%0a	Lipid metabolism	Metabolism
20	MAPK signaling pathway - plant	KEGG PATHWAY	map04016	20/825	260/18577	0.0123179	0.0773294	MsG0580025558.01|MsG0280006553.01|MsG0580025278.01|MsG0480018500.01|MsG0880047444.01|MsG0580028560.01|MsG0080048230.01|MsG0280006550.01|MsG0580024347.01|MsG0380015520.01|MsG0380014920.01|MsG0780036291.01|MsG0480023807.01|MsG0280006552.01|MsG0280007934.01|MsG0180003836.01|MsG0780040733.01|MsG0180001804.01|MsG0180000980.01|MsG0180004079.01	http://www.genome.jp/kegg-bin/show_pathway?map=map04016&multi_query=K14497+white,red%0d%0aK14496+white,blue%0d%0aK13449+white,blue%0d%0aK13424+white,blue%0d%0aK14516+white,blue%0d%0aK02183+white,blue%0d%0a	Signal transduction	Environmental Information Processing
9	Alanine, aspartate and glutamate metabolism	KEGG PATHWAY	map00250	9/825	87/18577	0.0149957	0.0891847	MsG0780040173.01|MsG0580028450.01|MsG0880044869.01|MsG0180000295.01|MsG0380017168.01|MsG0880046102.01|MsG0680031695.01|MsG0180000296.01|MsG0380015217.01	http://www.genome.jp/kegg-bin/show_pathway?map=map00250&multi_query=K00261+white,blue%0d%0aK01915+white,blue%0d%0aK01953+white,red%0d%0aK13051+white,blue%0d%0a	Amino acid metabolism	Metabolism
10	Ascorbate and aldarate metabolism	KEGG PATHWAY	map00053	10/825	108/18577	0.0218316	0.123348	MsG0880042495.01|MsG0880046517.01|MsG0580026328.01|MsG0480018969.01|MsG0580026645.01|MsG0580026644.01|MsG0880042909.01|MsG0880047554.01|MsG0580026643.01|MsG0380015859.01	http://www.genome.jp/kegg-bin/show_pathway?map=map00053&multi_query=K00002+white,blue%0d%0aK08679+white,red%0d%0aK00103+white,red%0d%0aK00012+white,red%0d%0aK00469+white,blue%0d%0aK00423+white,blue%0d%0a	Carbohydrate metabolism	Metabolism
10	Inositol phosphate metabolism	KEGG PATHWAY	map00562	10/825	112/18577	0.0273029	0.140238	MsG0880047306.01|MsG0880042495.01|MsG0480023344.01|MsG0580026645.01|MsG0880046067.01|MsG0480023519.01|MsG0580026644.01|MsG0380016893.01|MsG0380015468.01|MsG0580026643.01	http://www.genome.jp/kegg-bin/show_pathway?map=map00562&multi_query=K24221+white,blue%0d%0aK05857+white,red%0d%0aK00921+white,red%0d%0aK01858+white,red%0d%0aK00469+white,blue%0d%0aK00889+white,pink%0d%0a	Carbohydrate metabolism	Metabolism
4	Stilbenoid, diarylheptanoid and gingerol biosynthesis	KEGG PATHWAY	map00945	4/825	26/18577	0.0265029	0.142611	MsG0880045881.01|MsG0880045634.01|MsG0380013835.01|MsG0580028603.01	http://www.genome.jp/kegg-bin/show_pathway?map=map00945&multi_query=K00487+white,blue%0d%0aK00588+white,blue%0d%0aK13065+white,red%0d%0a	Biosynthesis of other secondary metabolites	Metabolism
27	Plant-pathogen interaction	KEGG PATHWAY	map04626	27/825	440/18577	0.056664	0.278393	MsG0880047444.01|MsG0280006552.01|MsG0280007934.01|MsG0280006794.01|MsG0380014427.01|MsG0780041753.01|MsG0280006553.01|MsG0680031342.01|MsG0580025399.01|MsG0580028560.01|MsG0380015289.01|MsG0380014920.01|MsG0580028611.01|MsG0580025278.01|MsG0680032925.01|MsG0380011975.01|MsG0480024016.01|MsG0280006550.01|MsG0680034760.01|MsG0480020578.01|MsG0280010927.01|MsG0780036291.01|MsG0480021636.01|MsG04800…	http://www.genome.jp/kegg-bin/show_pathway?map=map04626&multi_query=K13449+white,blue%0d%0aK13457+white,blue%0d%0aK13433+white,blue%0d%0aK13412+white,red%0d%0aK04079+white,red%0d%0aK15397+white,pink%0d%0aK13448+white,red%0d%0aK05391+white,pink%0d%0aK13424+white,blue%0d%0aK13434+white,blue%0d%0aK02183+white,blue%0d%0a	Environmental adaptation	Organismal Systems
6	Phenylalanine metabolism	KEGG PATHWAY	map00360	6/825	63/18577	0.0602434	0.283646	MsG0780040942.01|MsG0780040943.01|MsG0180003542.01|MsG0880043065.01|MsG0780041217.01|MsG0880045289.01	http://www.genome.jp/kegg-bin/show_pathway?map=map00360&multi_query=K00276+white,blue%0d%0aK15849+white,blue%0d%0aK01593+white,red%0d%0aK10775+white,blue%0d%0a	Amino acid metabolism	Metabolism
16	Amino sugar and nucleotide sugar metabolism	KEGG PATHWAY	map00520	16/825	245/18577	0.0802213	0.348654	MsG0280008362.01|MsG0280011136.01|MsG0380017681.01|MsG0880046908.01|MsG0580026328.01|MsG0880046517.01|MsG0080049149.01|MsG0780036638.01|MsG0180000751.01|MsG0080047978.01|MsG0580025071.01|MsG0180005764.01|MsG0880042173.01|MsG0880047773.01|MsG0280008352.01|MsG0880047554.01	http://www.genome.jp/kegg-bin/show_pathway?map=map00520&multi_query=K01183+white,pink%0d%0aK15920+white,red%0d%0aK08679+white,red%0d%0aK01711+white,red%0d%0aK01784+white,blue%0d%0aK13379+white,red%0d%0aK12446+white,blue%0d%0aK00012+white,red%0d%0a	Carbohydrate metabolism	Metabolism
5	Diterpenoid biosynthesis	KEGG PATHWAY	map00904	5/825	52/18577	0.0800088	0.36164	MsG0180004772.01|MsG0280007031.01|MsG0280007043.01|MsG0280011347.01|MsG0180005519.01	http://www.genome.jp/kegg-bin/show_pathway?map=map00904&multi_query=K04124+white,red%0d%0aK04125+white,red%0d%0aK05282+white,blue%0d%0a	Metabolism of terpenoids and polyketides	Metabolism
1	Glycosphingolipid biosynthesis - lacto and neolacto series	KEGG PATHWAY	map00601	1/825	2/18577	0.0868496	0.363482	MsG0780039190.01	http://www.genome.jp/kegg-bin/show_pathway?map=map00601&multi_query=K01988+white,blue%0d%0a	Glycan biosynthesis and metabolism	Metabolism
12	Cysteine and methionine metabolism	KEGG PATHWAY	map00270	12/825	177/18577	0.0962082	0.388269	MsG0480023640.01|MsG0180005586.01|MsG0480021690.01|MsG0380015065.01|MsG0880046014.01|MsG0780040660.01|MsG0780039711.01|MsG0780040990.01|MsG0180005607.01|MsG0580029389.01|MsG0380016393.01|MsG0380016142.01	http://www.genome.jp/kegg-bin/show_pathway?map=map00270&multi_query=K01919+white,blue%0d%0aK05933+white,pink%0d%0aK01251+white,red%0d%0aK00640+white,blue%0d%0aK00547+white,pink%0d%0aK00789+white,red%0d%0aK13034+white,blue%0d%0aK01762+white,red%0d%0aK01738+white,red%0d%0a	Amino acid metabolism	Metabolism
6	Ubiquinone and other terpenoid-quinone biosynthesis	KEGG PATHWAY	map00130	6/825	76/18577	0.121251	0.456711	MsG0580024256.01|MsG0580028603.01|MsG0580025389.01|MsG0880044676.01|MsG0380015696.01|MsG0480018132.01	http://www.genome.jp/kegg-bin/show_pathway?map=map00130&multi_query=K00487+white,blue%0d%0aK01904+white,pink%0d%0aK03809+white,blue%0d%0a	Metabolism of cofactors and vitamins	Metabolism
5	Arginine biosynthesis	KEGG PATHWAY	map00220	5/825	59/18577	0.120583	0.46986	MsG0480019185.01|MsG0880046102.01|MsG0780040173.01|MsG0380015217.01|MsG0680031695.01	http://www.genome.jp/kegg-bin/show_pathway?map=map00220&multi_query=K00261+white,blue%0d%0aK01476+white,red%0d%0aK01915+white,blue%0d%0a	Amino acid metabolism	Metabolism
9	Peroxisome	KEGG PATHWAY	map04146	9/825	133/18577	0.137695	0.486237	MsG0180001085.01|MsG0280007385.01|MsG0280011054.01|MsG0380017554.01|MsG0480023340.01|MsG0480020560.01|MsG0280010254.01|MsG0680030294.01|MsG0180004774.01	http://www.genome.jp/kegg-bin/show_pathway?map=map04146&multi_query=K13356+white,red%0d%0aK12261+white,blue%0d%0aK00306+white,blue%0d%0aK13348+white,blue%0d%0aK00106+white,blue%0d%0aK00232+white,blue%0d%0aK01897+white,red%0d%0aK13347+white,blue%0d%0a	Transport and catabolism	Cellular Processes
3	Glycosaminoglycan degradation	KEGG PATHWAY	map00531	3/825	29/18577	0.136176	0.496383	MsG0380015833.01|MsG0780036008.01|MsG0780041526.01	http://www.genome.jp/kegg-bin/show_pathway?map=map00531&multi_query=K10532+white,red%0d%0aK01205+white,blue%0d%0a	Glycan biosynthesis and metabolism	Metabolism
4	Nitrogen metabolism	KEGG PATHWAY	map00910	4/825	46/18577	0.146377	0.50123	MsG0880046102.01|MsG0780040173.01|MsG0380015217.01|MsG0680031695.01	http://www.genome.jp/kegg-bin/show_pathway?map=map00910&multi_query=K00261+white,blue%0d%0aK01915+white,blue%0d%0a	Energy metabolism	Metabolism
10	Glycerophospholipid metabolism	KEGG PATHWAY	map00564	10/825	158/18577	0.16568	0.505995	MsG0180005414.01|MsG0780039186.01|MsG0480021808.01|MsG0780040005.01|MsG0280009691.01|MsG0480021218.01|MsG0180005917.01|MsG0780040405.01|MsG0480019906.01|MsG0380017894.01	http://www.genome.jp/kegg-bin/show_pathway?map=map00564&multi_query=K00006+white,red%0d%0aK25193+white,red%0d%0aK18696+white,blue%0d%0aK18693+white,blue%0d%0aK01115+white,blue%0d%0aK13508+white,pink%0d%0aK14674+white,blue%0d%0aK13513+white,red%0d%0a	Lipid metabolism	Metabolism
4	Linoleic acid metabolism	KEGG PATHWAY	map00591	4/825	48/18577	0.163298	0.512574	MsG0880042441.01|MsG0780040405.01|MsG0580025193.01|MsG0780041556.01	http://www.genome.jp/kegg-bin/show_pathway?map=map00591&multi_query=K14674+white,blue%0d%0aK15718+white,blue%0d%0a	Lipid metabolism	Metabolism
5	Tyrosine metabolism	KEGG PATHWAY	map00350	5/825	64/18577	0.154391	0.513123	MsG0880043065.01|MsG0780041217.01|MsG0480019997.01|MsG0380017016.01|MsG0880045289.01	http://www.genome.jp/kegg-bin/show_pathway?map=map00350&multi_query=K00121+white,blue%0d%0aK00276+white,blue%0d%0aK15849+white,blue%0d%0aK01593+white,red%0d%0a	Amino acid metabolism	Metabolism
8	Phosphatidylinositol signaling system	KEGG PATHWAY	map04070	8/825	119/18577	0.159533	0.515064	MsG0580025278.01|MsG0880047306.01|MsG0880047444.01|MsG0680030719.01|MsG0480023519.01|MsG0780036291.01|MsG0380016893.01|MsG0380015468.01	http://www.genome.jp/kegg-bin/show_pathway?map=map04070&multi_query=K05857+white,red%0d%0aK00921+white,red%0d%0aK02183+white,blue%0d%0aK00889+white,pink%0d%0aK13024+white,blue%0d%0a	Signal transduction	Environmental Information Processing
3	Isoquinoline alkaloid biosynthesis	KEGG PATHWAY	map00950	3/825	33/18577	0.179319	0.533239	MsG0880043065.01|MsG0780041217.01|MsG0880045289.01	http://www.genome.jp/kegg-bin/show_pathway?map=map00950&multi_query=K00276+white,blue%0d%0aK15849+white,blue%0d%0aK01593+white,red%0d%0a	Biosynthesis of other secondary metabolites	Metabolism
7	Arginine and proline metabolism	KEGG PATHWAY	map00330	7/825	108/18577	0.204275	0.536816	MsG0780036812.01|MsG0780038866.01|MsG0380013491.01|MsG0880046573.01|MsG0480019185.01|MsG0680031116.01|MsG0480018921.01	http://www.genome.jp/kegg-bin/show_pathway?map=map00330&multi_query=K01476+white,red%0d%0aK17839+white,red%0d%0aK10536+white,blue%0d%0aK00318+white,blue%0d%0aK12657+white,red%0d%0a	Amino acid metabolism	Metabolism
3	Flavone and flavonol biosynthesis	KEGG PATHWAY	map00944	3/825	34/18577	0.190634	0.55235	MsG0380013409.01|MsG0380012607.01|MsG0380012606.01	http://www.genome.jp/kegg-bin/show_pathway?map=map00944&multi_query=K13083+white,blue%0d%0aK05280+white,blue%0d%0a	Biosynthesis of other secondary metabolites	Metabolism
2	Brassinosteroid biosynthesis	KEGG PATHWAY	map00905	2/825	20/18577	0.22216	0.570547	MsG0680031007.01|MsG0880042748.01	http://www.genome.jp/kegg-bin/show_pathway?map=map00905&multi_query=K20623+white,blue%0d%0aK09590+white,red%0d%0a	Metabolism of terpenoids and polyketides	Metabolism
1	Exopolysaccharide biosynthesis	KEGG PATHWAY	map00543	1/825	5/18577	0.203203	0.574049	MsG0480021690.01	http://www.genome.jp/kegg-bin/show_pathway?map=map00543&multi_query=K00640+white,blue%0d%0a	Glycan biosynthesis and metabolism	Metabolism
1	Indole alkaloid biosynthesis	KEGG PATHWAY	map00901	1/825	5/18577	0.203203	0.574049	MsG0880043065.01	http://www.genome.jp/kegg-bin/show_pathway?map=map00901&multi_query=K01593+white,red%0d%0a	Biosynthesis of other secondary metabolites	Metabolism
1	Caffeine metabolism	KEGG PATHWAY	map00232	1/825	5/18577	0.203203	0.574049	MsG0280011054.01	http://www.genome.jp/kegg-bin/show_pathway?map=map00232&multi_query=K00106+white,blue%0d%0a	Biosynthesis of other secondary metabolites	Metabolism
8	Glycerolipid metabolism	KEGG PATHWAY	map00561	8/825	132/18577	0.233154	0.585476	MsG0780039186.01|MsG0480018969.01|MsG0180004855.01|MsG0280009691.01|MsG0680034677.01|MsG0480021218.01|MsG0180005917.01|MsG0780040405.01	http://www.genome.jp/kegg-bin/show_pathway?map=map00561&multi_query=K00002+white,blue%0d%0aK18693+white,blue%0d%0aK13508+white,pink%0d%0aK01054+white,red%0d%0aK14674+white,blue%0d%0aK13513+white,red%0d%0a	Lipid metabolism	Metabolism
3	Zeatin biosynthesis	KEGG PATHWAY	map00908	3/825	40/18577	0.261563	0.642534	MsG0480019150.01|MsG0780041030.01|MsG0180001050.01	http://www.genome.jp/kegg-bin/show_pathway?map=map00908&multi_query=K13495+white,blue%0d%0aK13496+white,pink%0d%0a	Metabolism of terpenoids and polyketides	Metabolism
3	Folate biosynthesis	KEGG PATHWAY	map00790	3/825	44/18577	0.31052	0.716096	MsG0080048312.01|MsG0780041208.01|MsG0280010998.01	http://www.genome.jp/kegg-bin/show_pathway?map=map00790&multi_query=K01633+white,red%0d%0aK14652+white,blue%0d%0a	Metabolism of cofactors and vitamins	Metabolism
2	Monobactam biosynthesis	KEGG PATHWAY	map00261	2/825	25/18577	0.305606	0.734754	MsG0180005544.01|MsG0880043455.01	http://www.genome.jp/kegg-bin/show_pathway?map=map00261&multi_query=K13811+white,blue%0d%0aK01714+white,blue%0d%0a	Biosynthesis of other secondary metabolites	Metabolism
2	Valine, leucine and isoleucine biosynthesis	KEGG PATHWAY	map00290	2/825	25/18577	0.305606	0.734754	MsG0480021962.01|MsG0480019381.01	http://www.genome.jp/kegg-bin/show_pathway?map=map00290&multi_query=K01703+white,blue%0d%0aK00053+white,red%0d%0a	Amino acid metabolism	Metabolism
2	Riboflavin metabolism	KEGG PATHWAY	map00740	2/825	28/18577	0.355034	0.802377	MsG0080048312.01|MsG0280010998.01	http://www.genome.jp/kegg-bin/show_pathway?map=map00740&multi_query=K14652+white,blue%0d%0a	Metabolism of cofactors and vitamins	Metabolism
1	C5-Branched dibasic acid metabolism	KEGG PATHWAY	map00660	1/825	10/18577	0.365154	0.809067	MsG0480019381.01	http://www.genome.jp/kegg-bin/show_pathway?map=map00660&multi_query=K01703+white,blue%0d%0a	Carbohydrate metabolism	Metabolism
1	Betalain biosynthesis	KEGG PATHWAY	map00965	1/825	10/18577	0.365154	0.809067	MsG0880043065.01	http://www.genome.jp/kegg-bin/show_pathway?map=map00965&multi_query=K01593+white,red%0d%0a	Biosynthesis of other secondary metabolites	Metabolism
1	Non-homologous end-joining	KEGG PATHWAY	map03450	1/825	11/18577	0.393363	0.838679	MsG0180006261.01	http://www.genome.jp/kegg-bin/show_pathway?map=map03450&multi_query=K10884+white,red%0d%0a	Replication and repair	Genetic Information Processing
4	Sesquiterpenoid and triterpenoid biosynthesis	KEGG PATHWAY	map00909	4/825	74/18577	0.418167	0.859143	MsG0280010323.01|MsG0680032038.01|MsG0780037676.01|MsG0280010322.01	http://www.genome.jp/kegg-bin/show_pathway?map=map00909&multi_query=K20659+white,red%0d%0aK15803+white,blue%0d%0aK15813+white,blue%0d%0a	Metabolism of terpenoids and polyketides	Metabolism
6	Phagosome	KEGG PATHWAY	map04145	6/825	116/18577	0.411248	0.860574	MsG0380017858.01|MsG0880047306.01|MsG0780040472.01|MsG0380017708.01|MsG0780040365.01|MsG0180005741.01	http://www.genome.jp/kegg-bin/show_pathway?map=map04145&multi_query=K00921+white,red%0d%0aK07374+white,red%0d%0aK07375+white,red%0d%0a	Transport and catabolism	Cellular Processes
3	Phenylalanine, tyrosine and tryptophan biosynthesis	KEGG PATHWAY	map00400	3/825	55/18577	0.444117	0.896165	MsG0780041217.01|MsG0580027880.01|MsG0280010484.01	http://www.genome.jp/kegg-bin/show_pathway?map=map00400&multi_query=K15849+white,blue%0d%0aK05359+white,blue%0d%0aK01626+white,blue%0d%0a	Amino acid metabolism	Metabolism
1	Glucosinolate biosynthesis	KEGG PATHWAY	map00966	1/825	14/18577	0.470696	0.933135	MsG0480019381.01	http://www.genome.jp/kegg-bin/show_pathway?map=map00966&multi_query=K01703+white,blue%0d%0a	Biosynthesis of other secondary metabolites	Metabolism
2	Other glycan degradation	KEGG PATHWAY	map00511	2/825	36/18577	0.479237	0.933686	MsG0880043600.01|MsG0180005790.01	http://www.genome.jp/kegg-bin/show_pathway?map=map00511&multi_query=K01190+white,red%0d%0aK15923+white,red%0d%0a	Glycan biosynthesis and metabolism	Metabolism
6	Glyoxylate and dicarboxylate metabolism	KEGG PATHWAY	map00630	6/825	127/18577	0.497728	0.937388	MsG0280010144.01|MsG0580024537.01|MsG0280010143.01|MsG0680033159.01|MsG0380015217.01|MsG0080048636.01	http://www.genome.jp/kegg-bin/show_pathway?map=map00630&multi_query=K01915+white,blue%0d%0aK01433+white,blue%0d%0aK01638+white,red%0d%0aK22133+white,blue%0d%0aK01601+white,red%0d%0a	Carbohydrate metabolism	Metabolism
1	Monoterpenoid biosynthesis	KEGG PATHWAY	map00902	1/825	15/18577	0.49422	0.946557	MsG0880043245.01	http://www.genome.jp/kegg-bin/show_pathway?map=map00902&multi_query=K15095+white,blue%0d%0a	Metabolism of terpenoids and polyketides	Metabolism
3	SNARE interactions in vesicular transport	KEGG PATHWAY	map04130	3/825	61/18577	0.512787	0.949918	MsG0780041198.01|MsG0380013070.01|MsG0180003240.01	http://www.genome.jp/kegg-bin/show_pathway?map=map04130&multi_query=K08486+white,blue%0d%0aK08493+white,red%0d%0a	Folding, sorting and degradation	Genetic Information Processing
3	Fatty acid elongation	KEGG PATHWAY	map00062	3/825	61/18577	0.512787	0.949918	MsG0480020578.01|MsG0680031342.01|MsG0680034760.01	http://www.genome.jp/kegg-bin/show_pathway?map=map00062&multi_query=K15397+white,pink%0d%0a	Lipid metabolism	Metabolism
3	Pantothenate and CoA biosynthesis	KEGG PATHWAY	map00770	3/825	66/18577	0.566406	0.984676	MsG0480021962.01|MsG0780041287.01|MsG0380013491.01	http://www.genome.jp/kegg-bin/show_pathway?map=map00770&multi_query=K17839+white,red%0d%0aK00859+white,blue%0d%0aK00053+white,red%0d%0a	Metabolism of cofactors and vitamins	Metabolism
2	Nicotinate and nicotinamide metabolism	KEGG PATHWAY	map00760	2/825	41/18577	0.54908	0.984858	MsG0180004732.01|MsG0180004734.01	http://www.genome.jp/kegg-bin/show_pathway?map=map00760&multi_query=K18551+white,blue%0d%0a	Metabolism of cofactors and vitamins	Metabolism
2	Ether lipid metabolism	KEGG PATHWAY	map00565	2/825	42/18577	0.562236	0.992699	MsG0780040405.01|MsG0380017894.01	http://www.genome.jp/kegg-bin/show_pathway?map=map00565&multi_query=K14674+white,blue%0d%0aK01115+white,blue%0d%0a	Lipid metabolism	Metabolism
3	beta-Alanine metabolism	KEGG PATHWAY	map00410	3/825	71/18577	0.616249	0.994801	MsG0880045289.01|MsG0380013491.01|MsG0480023340.01	http://www.genome.jp/kegg-bin/show_pathway?map=map00410&multi_query=K00276+white,blue%0d%0aK17839+white,red%0d%0aK00232+white,blue%0d%0a	Metabolism of other amino acids	Metabolism
3	Porphyrin metabolism	KEGG PATHWAY	map00860	3/825	72/18577	0.625739	0.995895	MsG0680035348.01|MsG0180001848.01|MsG0080049004.01	http://www.genome.jp/kegg-bin/show_pathway?map=map00860&multi_query=K08099+white,red%0d%0aK01885+white,blue%0d%0aK19073+white,red%0d%0a	Metabolism of cofactors and vitamins	Metabolism
8	Ribosome	KEGG PATHWAY	map03010	8/825	554/18577	0.999981	0.999981	MsG0580028107.01|MsG0380013995.01|MsG0180004607.01|MsG0380013970.01|MsG0580024139.01|MsG0380015596.01|MsG0180005361.01|MsG0380013949.01	http://www.genome.jp/kegg-bin/show_pathway?map=map03010&multi_query=K02874+white,red%0d%0aK02954+white,red%0d%0aK02866+white,blue%0d%0aK02881+white,blue%0d%0aK02891+white,red%0d%0aK02992+white,red%0d%0aK02940+white,blue%0d%0aK02964+white,red%0d%0a	Translation	Genetic Information Processing
4	Tryptophan metabolism	KEGG PATHWAY	map00380	4/825	92/18577	0.588317	1	MsG0880043065.01|MsG0480020072.01|MsG0480020076.01|MsG0380016112.01	http://www.genome.jp/kegg-bin/show_pathway?map=map00380&multi_query=K22588+white,pink%0d%0aK01593+white,red%0d%0a	Amino acid metabolism	Metabolism
6	Ribosome biogenesis in eukaryotes	KEGG PATHWAY	map03008	6/825	141/18577	0.600525	1	MsG0780036215.01|MsG0280006639.01|MsG0880047286.01|MsG0480023388.01|MsG0280006514.01|MsG0880042663.01	http://www.genome.jp/kegg-bin/show_pathway?map=map03008&multi_query=K14572+white,blue%0d%0aK14521+white,blue%0d%0aK14556+white,blue%0d%0aK11108+white,blue%0d%0aK14553+white,red%0d%0a	Translation	Genetic Information Processing
4	Fructose and mannose metabolism	KEGG PATHWAY	map00051	4/825	95/18577	0.613766	1	MsG0580024997.01|MsG0480021881.01|MsG0580025071.01|MsG0480019898.01	http://www.genome.jp/kegg-bin/show_pathway?map=map00051&multi_query=K01711+white,red%0d%0aK19355+white,pink%0d%0a	Carbohydrate metabolism	Metabolism
1	Photosynthesis - antenna proteins	KEGG PATHWAY	map00196	1/825	21/18577	0.614985	1	MsG0480022765.01	http://www.genome.jp/kegg-bin/show_pathway?map=map00196&multi_query=K08912+white,red%0d%0a	Energy metabolism	Metabolism
1	Glycosphingolipid biosynthesis - globo and isoglobo series	KEGG PATHWAY	map00603	1/825	23/18577	0.64846	1	MsG0780039190.01	http://www.genome.jp/kegg-bin/show_pathway?map=map00603&multi_query=K01988+white,blue%0d%0a	Glycan biosynthesis and metabolism	Metabolism
2	Steroid biosynthesis	KEGG PATHWAY	map00100	2/825	50/18577	0.65746	1	MsG0780040405.01|MsG0480021740.01	http://www.genome.jp/kegg-bin/show_pathway?map=map00100&multi_query=K14674+white,blue%0d%0aK09828+white,red%0d%0a	Lipid metabolism	Metabolism
2	Carotenoid biosynthesis	KEGG PATHWAY	map00906	2/825	50/18577	0.65746	1	MsG0480022983.01|MsG0580028723.01	http://www.genome.jp/kegg-bin/show_pathway?map=map00906&multi_query=K02291+white,red%0d%0aK15744+white,red%0d%0a	Metabolism of terpenoids and polyketides	Metabolism
1	D-Amino acid metabolism	KEGG PATHWAY	map00470	1/825	24/18577	0.664092	1	MsG0380012759.01	http://www.genome.jp/kegg-bin/show_pathway?map=map00470&multi_query=K12235+white,blue%0d%0a	Metabolism of other amino acids	Metabolism
1	Arachidonic acid metabolism	KEGG PATHWAY	map00590	1/825	24/18577	0.664092	1	MsG0780040405.01	http://www.genome.jp/kegg-bin/show_pathway?map=map00590&multi_query=K14674+white,blue%0d%0a	Lipid metabolism	Metabolism
4	Pyrimidine metabolism	KEGG PATHWAY	map00240	4/825	104/18577	0.684007	1	MsG0880045368.01|MsG0880045384.01|MsG0780040022.01|MsG0380014600.01	http://www.genome.jp/kegg-bin/show_pathway?map=map00240&multi_query=K14641+white,blue%0d%0aK01937+white,blue%0d%0aK00876+white,blue%0d%0a	Nucleotide metabolism	Metabolism
1	Lysine biosynthesis	KEGG PATHWAY	map00300	1/825	26/18577	0.693302	1	MsG0880043455.01	http://www.genome.jp/kegg-bin/show_pathway?map=map00300&multi_query=K01714+white,blue%0d%0a	Amino acid metabolism	Metabolism
3	Fatty acid biosynthesis	KEGG PATHWAY	map00061	3/825	82/18577	0.711646	1	MsG0180001085.01|MsG0780038455.01|MsG0180004774.01	http://www.genome.jp/kegg-bin/show_pathway?map=map00061&multi_query=K01897+white,red%0d%0aK10782+white,red%0d%0a	Lipid metabolism	Metabolism
4	Carbon fixation in photosynthetic organisms	KEGG PATHWAY	map00710	4/825	109/18577	0.718934	1	MsG0480021968.01|MsG0880046970.01|MsG0280010144.01|MsG0280010143.01	http://www.genome.jp/kegg-bin/show_pathway?map=map00710&multi_query=K01595+white,red%0d%0aK01006+white,blue%0d%0aK01601+white,red%0d%0a	Energy metabolism	Metabolism
2	Biosynthesis of unsaturated fatty acids	KEGG PATHWAY	map01040	2/825	57/18577	0.726524	1	MsG0780040579.01|MsG0480023340.01	http://www.genome.jp/kegg-bin/show_pathway?map=map01040&multi_query=K10256+white,red%0d%0aK00232+white,blue%0d%0a	Lipid metabolism	Metabolism
5	Purine metabolism	KEGG PATHWAY	map00230	5/825	137/18577	0.733199	1	MsG0780040022.01|MsG0180005544.01|MsG0480023648.01|MsG0280006695.01|MsG0280011054.01	http://www.genome.jp/kegg-bin/show_pathway?map=map00230&multi_query=K01466+white,red%0d%0aK13811+white,blue%0d%0aK00106+white,blue%0d%0aK14641+white,blue%0d%0aK01951+white,blue%0d%0a	Nucleotide metabolism	Metabolism
6	Pyruvate metabolism	KEGG PATHWAY	map00620	6/825	164/18577	0.741253	1	MsG0480018969.01|MsG0480019997.01|MsG0480021968.01|MsG0380017016.01|MsG0080048636.01|MsG0880046970.01	http://www.genome.jp/kegg-bin/show_pathway?map=map00620&multi_query=K00121+white,blue%0d%0aK01595+white,red%0d%0aK00002+white,blue%0d%0aK01006+white,blue%0d%0aK01638+white,red%0d%0a	Carbohydrate metabolism	Metabolism
2	N-Glycan biosynthesis	KEGG PATHWAY	map00510	2/825	64/18577	0.783423	1	MsG0480023247.01|MsG0580025500.01	http://www.genome.jp/kegg-bin/show_pathway?map=map00510&multi_query=K00737+white,red%0d%0aK07441+white,blue%0d%0a	Glycan biosynthesis and metabolism	Metabolism
1	One carbon pool by folate	KEGG PATHWAY	map00670	1/825	34/18577	0.786878	1	MsG0580024537.01	http://www.genome.jp/kegg-bin/show_pathway?map=map00670&multi_query=K01433+white,blue%0d%0a	Metabolism of cofactors and vitamins	Metabolism
2	Sphingolipid metabolism	KEGG PATHWAY	map00600	2/825	65/18577	0.790644	1	MsG0780036876.01|MsG0880043600.01	http://www.genome.jp/kegg-bin/show_pathway?map=map00600&multi_query=K01190+white,red%0d%0aK01634+white,blue%0d%0a	Lipid metabolism	Metabolism
4	Glycine, serine and threonine metabolism	KEGG PATHWAY	map00260	4/825	121/18577	0.790918	1	MsG0380012759.01|MsG0380015836.01|MsG0380017554.01|MsG0880045289.01	http://www.genome.jp/kegg-bin/show_pathway?map=map00260&multi_query=K00276+white,blue%0d%0aK00306+white,blue%0d%0aK12235+white,blue%0d%0aK00130+white,blue%0d%0a	Amino acid metabolism	Metabolism
1	Selenocompound metabolism	KEGG PATHWAY	map00450	1/825	35/18577	0.79636	1	MsG0180005544.01	http://www.genome.jp/kegg-bin/show_pathway?map=map00450&multi_query=K13811+white,blue%0d%0a	Metabolism of other amino acids	Metabolism
5	Photosynthesis	KEGG PATHWAY	map00195	5/825	159/18577	0.839802	1	MsG0380013971.01|MsG0380014016.01|MsG0380013956.01|MsG0880045275.01|MsG0380014023.01	http://www.genome.jp/kegg-bin/show_pathway?map=map00195&multi_query=K02703+white,red%0d%0aK02689+white,red%0d%0aK02690+white,red%0d%0a	Energy metabolism	Metabolism
1	Various types of N-glycan biosynthesis	KEGG PATHWAY	map00513	1/825	45/18577	0.870834	1	MsG0580025500.01	http://www.genome.jp/kegg-bin/show_pathway?map=map00513&multi_query=K07441+white,blue%0d%0a	Glycan biosynthesis and metabolism	Metabolism
1	Autophagy - other	KEGG PATHWAY	map04136	1/825	46/18577	0.876584	1	MsG0380016793.01	http://www.genome.jp/kegg-bin/show_pathway?map=map04136&multi_query=K08331+white,blue%0d%0a	Transport and catabolism	Cellular Processes
8	Oxidative phosphorylation	KEGG PATHWAY	map00190	8/825	255/18577	0.883794	1	MsG0480022486.01|MsG0380013968.01|MsG0280008226.01|MsG0380013915.01|MsG0580028442.01|MsG0080047803.01|MsG0480020052.01|MsG0180003710.01	http://www.genome.jp/kegg-bin/show_pathway?map=map00190&multi_query=K03885+white,blue%0d%0aK03955+white,red%0d%0aK01507+white,blue%0d%0aK01535+white,blue%0d%0aK05573+white,red%0d%0aK05579+white,red%0d%0a	Energy metabolism	Metabolism
5	Glycolysis / Gluconeogenesis	KEGG PATHWAY	map00010	5/825	182/18577	0.911089	1	MsG0880046970.01|MsG0480022590.01|MsG0480019997.01|MsG0380017016.01|MsG0480018969.01	http://www.genome.jp/kegg-bin/show_pathway?map=map00010&multi_query=K00121+white,blue%0d%0aK01792+white,red%0d%0aK00002+white,blue%0d%0aK01006+white,blue%0d%0a	Carbohydrate metabolism	Metabolism
8	Pentose and glucuronate interconversions	KEGG PATHWAY	map00040	8/825	268/18577	0.912687	1	MsG0780038647.01|MsG0880046517.01|MsG0580026328.01|MsG0480018969.01|MsG0580025736.01|MsG0780037930.01|MsG0780037927.01|MsG0180003029.01	http://www.genome.jp/kegg-bin/show_pathway?map=map00040&multi_query=K01184+white,blue%0d%0aK01051+white,red%0d%0aK01213+white,blue%0d%0aK00012+white,red%0d%0aK01728+white,red%0d%0aK00002+white,blue%0d%0a	Carbohydrate metabolism	Metabolism
1	Propanoate metabolism	KEGG PATHWAY	map00640	1/825	55/18577	0.918092	1	MsG0480023340.01	http://www.genome.jp/kegg-bin/show_pathway?map=map00640&multi_query=K00232+white,blue%0d%0a	Carbohydrate metabolism	Metabolism
1	Mismatch repair	KEGG PATHWAY	map03430	1/825	59/18577	0.93174	1	MsG0880046651.01	http://www.genome.jp/kegg-bin/show_pathway?map=map03430&multi_query=K03111+white,blue%0d%0a	Replication and repair	Genetic Information Processing
11	Endocytosis	KEGG PATHWAY	map04144	11/825	365/18577	0.935703	1	MsG0480021042.01|MsG0480021467.01|MsG0780037877.01|MsG0680031848.01|MsG0880047581.01|MsG0280010002.01|MsG0480023519.01|MsG0380014270.01|MsG0380016893.01|MsG0480020939.01|MsG0380017894.01	http://www.genome.jp/kegg-bin/show_pathway?map=map04144&multi_query=K01115+white,blue%0d%0aK19366+white,red%0d%0aK07904+white,red%0d%0aK12483+white,red%0d%0aK00889+white,pink%0d%0aK03283+white,pink%0d%0a	Transport and catabolism	Cellular Processes
2	Nucleotide excision repair	KEGG PATHWAY	map03420	2/825	98/18577	0.935726	1	MsG0780037286.01|MsG0780037630.01	http://www.genome.jp/kegg-bin/show_pathway?map=map03420&multi_query=K10846+white,blue%0d%0a	Replication and repair	Genetic Information Processing
1	Lysine degradation	KEGG PATHWAY	map00310	1/825	67/18577	0.952598	1	MsG0380017554.01	http://www.genome.jp/kegg-bin/show_pathway?map=map00310&multi_query=K00306+white,blue%0d%0a	Amino acid metabolism	Metabolism
1	Terpenoid backbone biosynthesis	KEGG PATHWAY	map00900	1/825	76/18577	0.968555	1	MsG0880042291.01	http://www.genome.jp/kegg-bin/show_pathway?map=map00900&multi_query=K00099+white,blue%0d%0a	Metabolism of terpenoids and polyketides	Metabolism
1	Basal transcription factors	KEGG PATHWAY	map03022	1/825	78/18577	0.971297	1	MsG0880046615.01	http://www.genome.jp/kegg-bin/show_pathway?map=map03022&multi_query=K03136+white,red%0d%0a	Transcription	Genetic Information Processing
1	Pentose phosphate pathway	KEGG PATHWAY	map00030	1/825	82/18577	0.976086	1	MsG0780037751.01	http://www.genome.jp/kegg-bin/show_pathway?map=map00030&multi_query=K00036+white,blue%0d%0a	Carbohydrate metabolism	Metabolism
1	DNA replication	KEGG PATHWAY	map03030	1/825	85/18577	0.979145	1	MsG0880046651.01	http://www.genome.jp/kegg-bin/show_pathway?map=map03030&multi_query=K03111+white,blue%0d%0a	Replication and repair	Genetic Information Processing
13	Protein processing in endoplasmic reticulum	KEGG PATHWAY	map04141	13/825	495/18577	0.987313	1	MsG0580027850.01|MsG0480022348.01|MsG0280007225.01|MsG0480022342.01|MsG0780037877.01|MsG0580029377.01|MsG0680031848.01|MsG0480022345.01|MsG0480022344.01|MsG0880047535.01|MsG0880047581.01|MsG0480020939.01|MsG0680032925.01	http://www.genome.jp/kegg-bin/show_pathway?map=map04141&multi_query=K03094+white,red%0d%0aK03283+white,pink%0d%0aK03347+white,red%0d%0aK13993+white,pink%0d%0aK04079+white,red%0d%0a	Folding, sorting and degradation	Genetic Information Processing
2	Aminoacyl-tRNA biosynthesis	KEGG PATHWAY	map00970	2/825	151/18577	0.99176	1	MsG0080047802.01|MsG0180001848.01	http://www.genome.jp/kegg-bin/show_pathway?map=map00970&multi_query=K01885+white,blue%0d%0aK01876+white,red%0d%0a	Translation	Genetic Information Processing
1	Homologous recombination	KEGG PATHWAY	map03440	1/825	116/18577	0.994939	1	MsG0880046651.01	http://www.genome.jp/kegg-bin/show_pathway?map=map03440&multi_query=K03111+white,blue%0d%0a	Replication and repair	Genetic Information Processing
9	Spliceosome	KEGG PATHWAY	map03040	9/825	425/18577	0.996684	1	MsG0580028595.01|MsG0780037877.01|MsG0680031848.01|MsG0880047581.01|MsG0080048831.01|MsG0180003565.01|MsG0280009718.01|MsG0680030401.01|MsG0480020939.01	http://www.genome.jp/kegg-bin/show_pathway?map=map03040&multi_query=K12854+white,blue%0d%0aK12813+white,blue%0d%0aK12823+white,red%0d%0aK12828+white,red%0d%0aK03283+white,pink%0d%0a	Transcription	Genetic Information Processing
2	RNA degradation	KEGG PATHWAY	map03018	2/825	178/18577	0.997232	1	MsG0680030398.01|MsG0680032370.01	http://www.genome.jp/kegg-bin/show_pathway?map=map03018&multi_query=K00962+white,blue%0d%0aK13126+white,blue%0d%0a	Folding, sorting and degradation	Genetic Information Processing
1	RNA polymerase	KEGG PATHWAY	map03020	1/825	130/18577	0.997332	1	MsG0180004453.01	http://www.genome.jp/kegg-bin/show_pathway?map=map03020&multi_query=K03026+white,blue%0d%0a	Transcription	Genetic Information Processing
1	mRNA surveillance pathway	KEGG PATHWAY	map03015	1/825	178/18577	0.999704	1	MsG0680032370.01	http://www.genome.jp/kegg-bin/show_pathway?map=map03015&multi_query=K13126+white,blue%0d%0a	Translation	Genetic Information Processing
4	Ubiquitin mediated proteolysis	KEGG PATHWAY	map04120	4/825	361/18577	0.999937	1	MsG0280007074.01|MsG0880047535.01|MsG0580029377.01|MsG0380017515.01	http://www.genome.jp/kegg-bin/show_pathway?map=map04120&multi_query=K03094+white,red%0d%0aK03347+white,red%0d%0aK10144+white,red%0d%0a	Folding, sorting and degradation	Genetic Information Processing
2	Nucleocytoplasmic transport	KEGG PATHWAY	map03013	2/825	288/18577	0.999973	1	MsG0180000384.01|MsG0180004377.01	http://www.genome.jp/kegg-bin/show_pathway?map=map03013&multi_query=K14297+white,red%0d%0aK14291+white,blue%0d%0a	Translation	Genetic Information Processing
