# Supplementary material for: Transcriptomic Analysis to Identify Melatonin-mediated Salt-responsive Genes During the Germinated Stage of Alfalfa
Source: Preprints.org preprint supplement (doi:10.20944/preprints202403.0648.v1), 2024-03-12
Supplement: Supplementary file 5 [file Table S5.xlsx]

## Sheet: ZMNMTvsZMCK
Supplemental table S5.The KEGG PATHWAY enrichment of ZMNMTvsZMCK gene concentration was analyzed using R script
#Study_num	Term	Database	ID	Ratio_in_study	Ratio_in_pop	P-Value	Corrected P-Value	Genes	Hyperlink	typeII	typeI
28	Isoflavonoid biosynthesis	KEGG PATHWAY	map00943	28/1674	63/18577	1.21e-13	1.5e-11	MsG0480021255.01|MsG0480019532.01|MsG0780036579.01|MsG0480022309.01|MsG0780036575.01|MsG0780036961.01|MsG0780036582.01|MsG0380014439.01|MsG0480021549.01|MsG0780040610.01|MsG0480022310.01|MsG0780040611.01|MsG0480022311.01|MsG0880045930.01|MsG0580024116.01|MsG0480022835.01|MsG0480022308.01|MsG0180005648.01|MsG0480021257.01|MsG0580024990.01|MsG0780040612.01|MsG0780040613.01|MsG0680030960.01|MsG07800…	http://www.genome.jp/kegg-bin/show_pathway?map=map00943&multi_query=K13262+white,blue%0d%0aK13260+white,blue%0d%0aK13267+white,blue%0d%0aK13266+white,blue%0d%0aK13265+white,blue%0d%0aK13264+white,blue%0d%0aK13258+white,blue%0d%0aK25075+white,blue%0d%0aK13259+white,blue%0d%0aK13257+white,blue%0d%0aK05281+white,blue%0d%0a	Biosynthesis of other secondary metabolites	Metabolism
60	Phenylpropanoid biosynthesis	KEGG PATHWAY	map00940	60/1674	261/18577	7.97e-12	4.94e-10	MsG0780040942.01|MsG0280007686.01|MsG0580024758.01|MsG0580024256.01|MsG0680035643.01|MsG0180004326.01|MsG0180003504.01|MsG0680030631.01|MsG0180003542.01|MsG0580028603.01|MsG0280007689.01|MsG0580024933.01|MsG0880045664.01|MsG0580025389.01|MsG0180004768.01|MsG0180004855.01|MsG0280010617.01|MsG0580025234.01|MsG0480019345.01|MsG0480019346.01|MsG0580027754.01|MsG0780040945.01|MsG0480019344.01|MsG01800…	http://www.genome.jp/kegg-bin/show_pathway?map=map00940&multi_query=K10775+white,blue%0d%0aK13066+white,blue%0d%0aK00083+white,red%0d%0aK12355+white,blue%0d%0aK12356+white,pink%0d%0aK01904+white,pink%0d%0aK09755+white,blue%0d%0aK00430+white,pink%0d%0aK18368+white,pink%0d%0aK00487+white,blue%0d%0aK22395+white,blue%0d%0aK09753+white,blue%0d%0a	Biosynthesis of other secondary metabolites	Metabolism
31	Flavonoid biosynthesis	KEGG PATHWAY	map00941	31/1674	104/18577	1.25e-09	3.87e-08	MsG0780037462.01|MsG0180005357.01|MsG0780036661.01|MsG0580024260.01|MsG0580024218.01|MsG0880045645.01|MsG0580028603.01|MsG0380016128.01|MsG0380013409.01|MsG0380016086.01|MsG0580030135.01|MsG0580027459.01|MsG0580024220.01|MsG0580024263.01|MsG0180005358.01|MsG0080048347.01|MsG0480022555.01|MsG0180006187.01|MsG0280009253.01|MsG0080048348.01|MsG0380012601.01|MsG0380012606.01|MsG0380016127.01|MsG00800…	http://www.genome.jp/kegg-bin/show_pathway?map=map00941&multi_query=K08695+white,red%0d%0aK13083+white,blue%0d%0aK08243+white,blue%0d%0aK01859+white,blue%0d%0aK00475+white,blue%0d%0aK00660+white,blue%0d%0aK05278+white,blue%0d%0aK00487+white,blue%0d%0aK05280+white,blue%0d%0a	Biosynthesis of other secondary metabolites	Metabolism
25	Tropane, piperidine and pyridine alkaloid biosynthesis	KEGG PATHWAY	map00960	25/1674	71/18577	1.04e-09	4.29e-08	MsG0180005357.01|MsG0380016128.01|MsG0580024260.01|MsG0580024218.01|MsG0780036661.01|MsG0380015350.01|MsG0580024220.01|MsG0580024263.01|MsG0180005622.01|MsG0080048347.01|MsG0280009253.01|MsG0080048345.01|MsG0880045289.01|MsG0380016127.01|MsG0080048352.01|MsG0880046942.01|MsG0580024217.01|MsG0380016129.01|MsG0180005358.01|MsG0680034592.01|MsG0080048348.01|MsG0880046071.01|MsG0180005356.01|MsG07800…	http://www.genome.jp/kegg-bin/show_pathway?map=map00960&multi_query=K00276+white,pink%0d%0aK15849+white,blue%0d%0aK13610+white,red%0d%0aK08081+white,red%0d%0aK00660+white,blue%0d%0a	Biosynthesis of other secondary metabolites	Metabolism
79	Plant-pathogen interaction	KEGG PATHWAY	map04626	79/1674	440/18577	1.95e-09	4.83e-08	MsG0580028980.01|MsG0480021617.01|MsG0780039869.01|MsG0380014405.01|MsG0380014410.01|MsG0880047235.01|MsG0380014163.01|MsG0880047444.01|MsG0380015931.01|MsG0280007934.01|MsG0080049128.01|MsG0880043126.01|MsG0780038147.01|MsG0380012033.01|MsG0380011968.01|MsG0280006552.01|MsG0880045336.01|MsG0580025095.01|MsG0280006794.01|MsG0380014427.01|MsG0480018321.01|MsG0380011976.01|MsG0280006553.01|MsG08800…	http://www.genome.jp/kegg-bin/show_pathway?map=map04626&multi_query=K20600+white,blue%0d%0aK15397+white,pink%0d%0aK13416+white,blue%0d%0aK13412+white,pink%0d%0aK13457+white,blue%0d%0aK13433+white,blue%0d%0aK13436+white,blue%0d%0aK13434+white,blue%0d%0aK02183+white,blue%0d%0aK18875+white,blue%0d%0aK13448+white,blue%0d%0aK01373+white,pink%0d%0aK05391+white,pink%0d%0aK20536+white,blue%0d%0aK00864+wh…	Environmental adaptation	Organismal Systems
57	Starch and sucrose metabolism	KEGG PATHWAY	map00500	57/1674	289/18577	1.19e-08	2.46e-07	MsG0580028893.01|MsG0680034847.01|MsG0180000437.01|MsG0880047531.01|MsG0180004376.01|MsG0480021718.01|MsG0280007216.01|MsG0380011756.01|MsG0380017023.01|MsG0180004835.01|MsG0180000436.01|MsG0380014678.01|MsG0480021114.01|MsG0480021120.01|MsG0480021135.01|MsG0680034970.01|MsG0380017934.01|MsG0380016045.01|MsG0880045029.01|MsG0880042591.01|MsG0880047658.01|MsG0680031683.01|MsG0680034834.01|MsG06800…	http://www.genome.jp/kegg-bin/show_pathway?map=map00500&multi_query=K13679+white,pink%0d%0aK00847+white,red%0d%0aK19893+white,red%0d%0aK00975+white,red%0d%0aK01177+white,pink%0d%0aK00700+white,red%0d%0aK01179+white,pink%0d%0aK19891+white,red%0d%0aK00963+white,red%0d%0aK00705+white,red%0d%0aK00688+white,red%0d%0aK05350+white,pink%0d%0aK01214+white,red%0d%0aK01188+white,blue%0d%0aK01193+white,pink%…	Carbohydrate metabolism	Metabolism
41	Glutathione metabolism	KEGG PATHWAY	map00480	41/1674	186/18577	5.61e-08	9.93e-07	MsG0580025998.01|MsG0380015010.01|MsG0680031876.01|MsG0480023109.01|MsG0780038930.01|MsG0580028712.01|MsG0780038924.01|MsG0880041970.01|MsG0580029684.01|MsG0380015008.01|MsG0180004879.01|MsG0580024232.01|MsG0780038939.01|MsG0180004941.01|MsG0580029682.01|MsG0680034195.01|MsG0380017037.01|MsG0780038922.01|MsG0180002217.01|MsG0280009764.01|MsG0780038925.01|MsG0180004942.01|MsG0480023414.01|MsG04800…	http://www.genome.jp/kegg-bin/show_pathway?map=map00480&multi_query=K10808+white,pink%0d%0aK18592+white,blue%0d%0aK00432+white,blue%0d%0aK01581+white,blue%0d%0aK00799+white,blue%0d%0aK21888+white,red%0d%0aK00036+white,blue%0d%0aK10807+white,red%0d%0aK01919+white,blue%0d%0aK22596+white,red%0d%0a	Metabolism of other amino acids	Metabolism
20	Circadian rhythm - plant	KEGG PATHWAY	map04712	20/1674	70/18577	2.2e-06	3.41e-05	MsG0480020869.01|MsG0080048347.01|MsG0580024220.01|MsG0080048352.01|MsG0180005357.01|MsG0280009253.01|MsG0780036661.01|MsG0580024217.01|MsG0380016128.01|MsG0380016129.01|MsG0380016127.01|MsG0580024263.01|MsG0580024260.01|MsG0580024218.01|MsG0480023945.01|MsG0180005358.01|MsG0080048348.01|MsG0080048345.01|MsG0180005356.01|MsG0180004712.01	http://www.genome.jp/kegg-bin/show_pathway?map=map04712&multi_query=K12129+white,blue%0d%0aK12120+white,red%0d%0aK12116+white,red%0d%0aK00660+white,blue%0d%0a	Environmental adaptation	Organismal Systems
25	Biosynthesis of various plant secondary metabolites	KEGG PATHWAY	map00999	25/1674	109/18577	1.01e-05	0.000139109	MsG0480021357.01|MsG0680034730.01|MsG0780040978.01|MsG0480021361.01|MsG0280007216.01|MsG0680034970.01|MsG0480021132.01|MsG0480021120.01|MsG0480021135.01|MsG0880045441.01|MsG0680031683.01|MsG0680035075.01|MsG0580027724.01|MsG0680031684.01|MsG0780040990.01|MsG0680034969.01|MsG0480021360.01|MsG0280007213.01|MsG0680035269.01|MsG0680034978.01|MsG0480021114.01|MsG0480021131.01|MsG0680034974.01|MsG03800…	http://www.genome.jp/kegg-bin/show_pathway?map=map00999&multi_query=K01188+white,blue%0d%0aK21568+white,blue%0d%0aK22374+white,pink%0d%0aK05350+white,pink%0d%0aK23145+white,blue%0d%0aK00789+white,red%0d%0aK05349+white,blue%0d%0a	Biosynthesis of other secondary metabolites	Metabolism
45	MAPK signaling pathway - plant	KEGG PATHWAY	map04016	45/1674	260/18577	1.52e-05	0.000188523	MsG0580025558.01|MsG0880043126.01|MsG0780041537.01|MsG0780039334.01|MsG0880045572.01|MsG0880047444.01|MsG0280006552.01|MsG0280007934.01|MsG0580025453.01|MsG0680034664.01|MsG0180003836.01|MsG0480023807.01|MsG0280006553.01|MsG0880047171.01|MsG0580025278.01|MsG0480020857.01|MsG0180004596.01|MsG0080048967.01|MsG0380014920.01|MsG0580028560.01|MsG0780039769.01|MsG0380015520.01|MsG0480023688.01|MsG00800…	http://www.genome.jp/kegg-bin/show_pathway?map=map04016&multi_query=K20718+white,red%0d%0aK14497+white,red%0d%0aK17686+white,pink%0d%0aK13426+white,blue%0d%0aK20600+white,blue%0d%0aK20547+white,blue%0d%0aK13416+white,blue%0d%0aK20772+white,blue%0d%0aK20725+white,blue%0d%0aK14496+white,blue%0d%0aK20606+white,red%0d%0aK13449+white,blue%0d%0aK20604+white,blue%0d%0aK13447+white,blue%0d%0aK13420+white…	Signal transduction	Environmental Information Processing
17	Cutin, suberine and wax biosynthesis	KEGG PATHWAY	map00073	17/1674	61/18577	1.8e-05	0.000203259	MsG0780037094.01|MsG0880047037.01|MsG0480023588.01|MsG0180001537.01|MsG0780040711.01|MsG0580028023.01|MsG0180003070.01|MsG0380014734.01|MsG0180001531.01|MsG0280011212.01|MsG0880042019.01|MsG0480021705.01|MsG0780040430.01|MsG0780040708.01|MsG0880044977.01|MsG0280011172.01|MsG0480020575.01	http://www.genome.jp/kegg-bin/show_pathway?map=map00073&multi_query=K13356+white,red%0d%0aK13407+white,blue%0d%0aK20495+white,blue%0d%0aK15404+white,pink%0d%0aK15401+white,blue%0d%0aK15400+white,pink%0d%0aK15403+white,red%0d%0aK15402+white,blue%0d%0a	Lipid metabolism	Metabolism
31	ABC transporters	KEGG PATHWAY	map02010	31/1674	168/18577	9.18e-05	0.000876047	MsG0480023470.01|MsG0780040784.01|MsG0880046889.01|MsG0280011267.01|MsG0480021564.01|MsG0680031875.01|MsG0680030746.01|MsG0780040806.01|MsG0280011350.01|MsG0280011349.01|MsG0380014433.01|MsG0180004752.01|MsG0480021563.01|MsG0180003146.01|MsG0180006161.01|MsG0780040878.01|MsG0180000628.01|MsG0680030679.01|MsG0880047233.01|MsG0680031988.01|MsG0180004869.01|MsG0680035772.01|MsG0480021817.01|MsG08800…	http://www.genome.jp/kegg-bin/show_pathway?map=map02010&multi_query=K08711+white,blue%0d%0aK05681+white,pink%0d%0aK05658+white,pink%0d%0aK05666+white,pink%0d%0a	Membrane transport	Environmental Information Processing
22	Cyanoamino acid metabolism	KEGG PATHWAY	map00460	22/1674	102/18577	9.05e-05	0.00093505	MsG0780038692.01|MsG0680034969.01|MsG0780039711.01|MsG0280007216.01|MsG0680034970.01|MsG0480021132.01|MsG0480021120.01|MsG0480021135.01|MsG0380017168.01|MsG0680031683.01|MsG0680035075.01|MsG0680031684.01|MsG0680035830.01|MsG0280007213.01|MsG0680035269.01|MsG0680034978.01|MsG0480021114.01|MsG0480021117.01|MsG0680032878.01|MsG0680034974.01|MsG0380012654.01|MsG0480021131.01	http://www.genome.jp/kegg-bin/show_pathway?map=map00460&multi_query=K01188+white,blue%0d%0aK13051+white,pink%0d%0aK18592+white,blue%0d%0aK05350+white,pink%0d%0aK05349+white,blue%0d%0aK13034+white,blue%0d%0a	Metabolism of other amino acids	Metabolism
22	Pyrimidine metabolism	KEGG PATHWAY	map00240	22/1674	104/18577	0.000122493	0.00108494	MsG0880045368.01|MsG0880044835.01|MsG0780040021.01|MsG0780040020.01|MsG0480023688.01|MsG0180002217.01|MsG0380016091.01|MsG0480023414.01|MsG0780037158.01|MsG0480022625.01|MsG0780040025.01|MsG0880046218.01|MsG0780040139.01|MsG0780040137.01|MsG0380014600.01|MsG0380011719.01|MsG0180002218.01|MsG0380012956.01|MsG0580027083.01|MsG0880045384.01|MsG0780040022.01|MsG0880046930.01	http://www.genome.jp/kegg-bin/show_pathway?map=map00240&multi_query=K00857+white,red%0d%0aK07023+white,red%0d%0aK01431+white,blue%0d%0aK14641+white,blue%0d%0aK10808+white,pink%0d%0aK01520+white,red%0d%0aK01493+white,red%0d%0aK10807+white,red%0d%0aK00940+white,red%0d%0aK01937+white,blue%0d%0aK00876+white,blue%0d%0a	Nucleotide metabolism	Metabolism
19	DNA replication	KEGG PATHWAY	map03030	19/1674	85/18577	0.000162727	0.00134521	MsG0180000718.01|MsG0680034764.01|MsG0880047172.01|MsG0280008039.01|MsG0880046905.01|MsG0580025358.01|MsG0380014666.01|MsG0380016217.01|MsG0880046904.01|MsG0680031622.01|MsG0480022784.01|MsG0780040580.01|MsG0780041359.01|MsG0580024813.01|MsG0880046537.01|MsG0480023296.01|MsG0480022982.01|MsG0480023262.01|MsG0880046213.01	http://www.genome.jp/kegg-bin/show_pathway?map=map03030&multi_query=K10756+white,red%0d%0aK02320+white,red%0d%0aK10755+white,red%0d%0aK02542+white,pink%0d%0aK02685+white,red%0d%0aK02321+white,red%0d%0aK07466+white,red%0d%0aK02210+white,red%0d%0aK04802+white,red%0d%0aK02540+white,red%0d%0aK02325+white,red%0d%0aK02209+white,red%0d%0aK02328+white,red%0d%0aK10739+white,red%0d%0aK02541+white,red%0d%0a	Replication and repair	Genetic Information Processing
4	Exopolysaccharide biosynthesis	KEGG PATHWAY	map00543	4/1674	5/18577	0.000304966	0.00222446	MsG0580029950.01|MsG0480021690.01|MsG0880043063.01|MsG0380014467.01	http://www.genome.jp/kegg-bin/show_pathway?map=map00543&multi_query=K00640+white,pink%0d%0a	Glycan biosynthesis and metabolism	Metabolism
13	Sulfur metabolism	KEGG PATHWAY	map00920	13/1674	49/18577	0.000294223	0.00228023	MsG0580029950.01|MsG0580024735.01|MsG0180004518.01|MsG0480021690.01|MsG0180005544.01|MsG0480022482.01|MsG0880043063.01|MsG0380014467.01|MsG0380016148.01|MsG0780039711.01|MsG0180005607.01|MsG0180004515.01|MsG0780037458.01	http://www.genome.jp/kegg-bin/show_pathway?map=map00920&multi_query=K00640+white,pink%0d%0aK13811+white,blue%0d%0aK00387+white,blue%0d%0aK17285+white,red%0d%0aK00860+white,blue%0d%0aK13034+white,blue%0d%0aK01082+white,blue%0d%0aK01738+white,pink%0d%0a	Energy metabolism	Metabolism
25	Purine metabolism	KEGG PATHWAY	map00230	25/1674	137/18577	0.000500897	0.00345062	MsG0580025203.01|MsG0180005544.01|MsG0280008103.01|MsG0880042743.01|MsG0780040021.01|MsG0780040020.01|MsG0280011054.01|MsG0380018035.01|MsG0480023688.01|MsG0180002217.01|MsG0480023414.01|MsG0780037158.01|MsG0580029969.01|MsG0580024735.01|MsG0280006695.01|MsG0780040139.01|MsG0280007337.01|MsG0180002218.01|MsG0780040137.01|MsG0880044835.01|MsG0380011719.01|MsG0780040025.01|MsG0580027083.01|MsG07800…	http://www.genome.jp/kegg-bin/show_pathway?map=map00230&multi_query=K00860+white,blue%0d%0aK00764+white,blue%0d%0aK07023+white,red%0d%0aK00106+white,blue%0d%0aK06928+white,red%0d%0aK01466+white,red%0d%0aK13811+white,blue%0d%0aK00602+white,red%0d%0aK10808+white,pink%0d%0aK14641+white,blue%0d%0aK00951+white,blue%0d%0aK10807+white,red%0d%0aK00940+white,red%0d%0aK01490+white,red%0d%0aK02083+white,blu…	Nucleotide metabolism	Metabolism
60	Plant hormone signal transduction	KEGG PATHWAY	map04075	60/1674	434/18577	0.000554304	0.00361756	MsG0280009128.01|MsG0780040948.01|MsG0580025558.01|MsG0280006783.01|MsG0880047408.01|MsG0480023363.01|MsG0780038810.01|MsG0480020539.01|MsG0380016587.01|MsG0280006552.01|MsG0280007934.01|MsG0480022313.01|MsG0880047494.01|MsG0080048057.01|MsG0480023807.01|MsG0280010515.01|MsG0280008436.01|MsG0880043041.01|MsG0180003836.01|MsG0480021454.01|MsG0880045915.01|MsG0480022917.01|MsG0880047495.01|MsG01800…	http://www.genome.jp/kegg-bin/show_pathway?map=map04075&multi_query=K14486+white,red%0d%0aK14494+white,red%0d%0aK14497+white,red%0d%0aK14496+white,blue%0d%0aK14491+white,blue%0d%0aK14432+white,red%0d%0aK14431+white,blue%0d%0aK14506+white,red%0d%0aK16189+white,blue%0d%0aK14505+white,red%0d%0aK14488+white,pink%0d%0aK14508+white,blue%0d%0aK13464+white,blue%0d%0aK14487+white,blue%0d%0aK14504+white,bl…	Signal transduction	Environmental Information Processing
20	Galactose metabolism	KEGG PATHWAY	map00052	20/1674	101/18577	0.000606735	0.00376176	MsG0180000436.01|MsG0580028893.01|MsG0880046441.01|MsG0580030022.01|MsG0780041389.01|MsG0180000437.01|MsG0780039438.01|MsG0180000438.01|MsG0280011165.01|MsG0880042591.01|MsG0580026903.01|MsG0780036210.01|MsG0880041965.01|MsG0580030055.01|MsG0480023783.01|MsG0280011203.01|MsG0880047773.01|MsG0880046816.01|MsG0280011193.01|MsG0480023604.01	http://www.genome.jp/kegg-bin/show_pathway?map=map00052&multi_query=K01193+white,pink%0d%0aK00850+white,blue%0d%0aK00963+white,red%0d%0aK18819+white,blue%0d%0aK01785+white,blue%0d%0aK01784+white,blue%0d%0aK07407+white,blue%0d%0aK06617+white,blue%0d%0a	Carbohydrate metabolism	Metabolism
14	Phenylalanine metabolism	KEGG PATHWAY	map00360	14/1674	63/18577	0.00121202	0.0071567	MsG0780040942.01|MsG0780040944.01|MsG0880046942.01|MsG0780041217.01|MsG0780040943.01|MsG0780040945.01|MsG0580030181.01|MsG0180005622.01|MsG0180003542.01|MsG0880046071.01|MsG0780039290.01|MsG0180005623.01|MsG0880045289.01|MsG0480021433.01	http://www.genome.jp/kegg-bin/show_pathway?map=map00360&multi_query=K07253+white,blue%0d%0aK01426+white,blue%0d%0aK00276+white,pink%0d%0aK15849+white,blue%0d%0aK10775+white,blue%0d%0a	Amino acid metabolism	Metabolism
18	alpha-Linolenic acid metabolism	KEGG PATHWAY	map00592	18/1674	100/18577	0.00337592	0.0190279	MsG0880047061.01|MsG0580024171.01|MsG0380012400.01|MsG0580024178.01|MsG0680030615.01|MsG0680030613.01|MsG0580024176.01|MsG0580024168.01|MsG0180000197.01|MsG0580024170.01|MsG0880042750.01|MsG0480019525.01|MsG0580027261.01|MsG0580024172.01|MsG0480023340.01|MsG0480019593.01|MsG0780040405.01|MsG0480019594.01	http://www.genome.jp/kegg-bin/show_pathway?map=map00592&multi_query=K01723+white,blue%0d%0aK05894+white,blue%0d%0aK00454+white,blue%0d%0aK00232+white,blue%0d%0aK10525+white,red%0d%0aK10527+white,red%0d%0aK10529+white,pink%0d%0aK14674+white,blue%0d%0aK00224+white,blue%0d%0a	Lipid metabolism	Metabolism
8	Flavone and flavonol biosynthesis	KEGG PATHWAY	map00944	8/1674	34/18577	0.00925642	0.0499042	MsG0780037462.01|MsG0380012607.01|MsG0680030960.01|MsG0380012601.01|MsG0380012604.01|MsG0480021938.01|MsG0380013409.01|MsG0380012606.01	http://www.genome.jp/kegg-bin/show_pathway?map=map00944&multi_query=K22794+white,blue%0d%0aK13083+white,blue%0d%0aK05280+white,blue%0d%0aK13264+white,blue%0d%0a	Biosynthesis of other secondary metabolites	Metabolism
25	Cysteine and methionine metabolism	KEGG PATHWAY	map00270	25/1674	177/18577	0.0161784	0.0835883	MsG0580029950.01|MsG0680031876.01|MsG0480021690.01|MsG0380015065.01|MsG0780040978.01|MsG0780039711.01|MsG0580025177.01|MsG0780039769.01|MsG0180005607.01|MsG0580029389.01|MsG0380016393.01|MsG0680035776.01|MsG0380016097.01|MsG0480023018.01|MsG0480018785.01|MsG0880043063.01|MsG0380014467.01|MsG0180005586.01|MsG0780040660.01|MsG0780040990.01|MsG0180004518.01|MsG0180004515.01|MsG0380015975.01|MsG01800…	http://www.genome.jp/kegg-bin/show_pathway?map=map00270&multi_query=K05933+white,pink%0d%0aK01251+white,red%0d%0aK00640+white,pink%0d%0aK20772+white,blue%0d%0aK00025+white,red%0d%0aK00547+white,pink%0d%0aK01761+white,red%0d%0aK00789+white,red%0d%0aK13034+white,blue%0d%0aK01919+white,blue%0d%0aK00558+white,red%0d%0aK01738+white,pink%0d%0a	Amino acid metabolism	Metabolism
9	Linoleic acid metabolism	KEGG PATHWAY	map00591	9/1674	48/18577	0.0258304	0.128119	MsG0880042625.01|MsG0780041556.01|MsG0280011145.01|MsG0880042750.01|MsG0880042441.01|MsG0880042444.01|MsG0580025193.01|MsG0880042642.01|MsG0780040405.01	http://www.genome.jp/kegg-bin/show_pathway?map=map00591&multi_query=K14674+white,blue%0d%0aK00454+white,blue%0d%0aK15718+white,blue%0d%0a	Lipid metabolism	Metabolism
13	Fatty acid biosynthesis	KEGG PATHWAY	map00061	13/1674	82/18577	0.0312606	0.149089	MsG0780039842.01|MsG0380015639.01|MsG0380016466.01|MsG0180001085.01|MsG0780040315.01|MsG0380016465.01|MsG0480022783.01|MsG0680030950.01|MsG0480018442.01|MsG0480021719.01|MsG0380016968.01|MsG0780038455.01|MsG0380016610.01	http://www.genome.jp/kegg-bin/show_pathway?map=map00061&multi_query=K10781+white,blue%0d%0aK18660+white,blue%0d%0aK10782+white,red%0d%0aK01963+white,red%0d%0aK02160+white,red%0d%0aK01897+white,red%0d%0aK11262+white,blue%0d%0aK03921+white,red%0d%0aK00208+white,red%0d%0aK09458+white,red%0d%0a	Lipid metabolism	Metabolism
4	Monoterpenoid biosynthesis	KEGG PATHWAY	map00902	4/1674	15/18577	0.0400314	0.183848	MsG0880043246.01|MsG0880043250.01|MsG0880043245.01|MsG0880043244.01	http://www.genome.jp/kegg-bin/show_pathway?map=map00902&multi_query=K15095+white,blue%0d%0a	Metabolism of terpenoids and polyketides	Metabolism
11	beta-Alanine metabolism	KEGG PATHWAY	map00410	11/1674	71/18577	0.0521242	0.230836	MsG0380015175.01|MsG0580028896.01|MsG0880046942.01|MsG0180005622.01|MsG0380016360.01|MsG0480023340.01|MsG0880046071.01|MsG0380016359.01|MsG0180005623.01|MsG0880045289.01|MsG0480022625.01	http://www.genome.jp/kegg-bin/show_pathway?map=map00410&multi_query=K00276+white,pink%0d%0aK17839+white,blue%0d%0aK00128+white,blue%0d%0aK00232+white,blue%0d%0aK01580+white,red%0d%0aK01431+white,blue%0d%0a	Metabolism of other amino acids	Metabolism
10	Tyrosine metabolism	KEGG PATHWAY	map00350	10/1674	64/18577	0.0592967	0.253545	MsG0880046942.01|MsG0780041217.01|MsG0480019997.01|MsG0180005622.01|MsG0580029511.01|MsG0380017016.01|MsG0880046071.01|MsG0780039290.01|MsG0180005623.01|MsG0880045289.01	http://www.genome.jp/kegg-bin/show_pathway?map=map00350&multi_query=K07253+white,blue%0d%0aK00121+white,pink%0d%0aK00276+white,pink%0d%0aK15849+white,blue%0d%0a	Amino acid metabolism	Metabolism
21	Pyruvate metabolism	KEGG PATHWAY	map00620	21/1674	164/18577	0.0637735	0.255094	MsG0880046968.01|MsG0280008554.01|MsG0380015639.01|MsG0780039842.01|MsG0780040315.01|MsG0880045356.01|MsG0480019997.01|MsG0880047657.01|MsG0680030950.01|MsG0480021968.01|MsG0580029511.01|MsG0380017016.01|MsG0380016360.01|MsG0880046969.01|MsG0880046970.01|MsG0380016359.01|MsG0480018969.01|MsG0880047656.01|MsG0180001784.01|MsG0780039304.01|MsG0080048636.01	http://www.genome.jp/kegg-bin/show_pathway?map=map00620&multi_query=K00002+white,pink%0d%0aK01006+white,blue%0d%0aK01759+white,red%0d%0aK00128+white,blue%0d%0aK01913+white,blue%0d%0aK01595+white,red%0d%0aK01963+white,red%0d%0aK02160+white,red%0d%0aK01638+white,red%0d%0aK00025+white,red%0d%0aK00121+white,pink%0d%0aK11262+white,blue%0d%0a	Carbohydrate metabolism	Metabolism
12	Fatty acid degradation	KEGG PATHWAY	map00071	12/1674	82/18577	0.0631226	0.260907	MsG0880047061.01|MsG0880047037.01|MsG0180001085.01|MsG0480019997.01|MsG0580028023.01|MsG0380014734.01|MsG0580029511.01|MsG0380017016.01|MsG0380016360.01|MsG0480023340.01|MsG0380016359.01|MsG0780036946.01	http://www.genome.jp/kegg-bin/show_pathway?map=map00071&multi_query=K20495+white,blue%0d%0aK00128+white,blue%0d%0aK00232+white,blue%0d%0aK15401+white,blue%0d%0aK10527+white,red%0d%0aK01897+white,red%0d%0aK00121+white,pink%0d%0aK07517+white,blue%0d%0a	Lipid metabolism	Metabolism
6	Isoquinoline alkaloid biosynthesis	KEGG PATHWAY	map00950	6/1674	33/18577	0.0715599	0.277295	MsG0880046942.01|MsG0180005622.01|MsG0880046071.01|MsG0780041217.01|MsG0180005623.01|MsG0880045289.01	http://www.genome.jp/kegg-bin/show_pathway?map=map00950&multi_query=K00276+white,pink%0d%0aK15849+white,blue%0d%0a	Biosynthesis of other secondary metabolites	Metabolism
5	Vitamin B6 metabolism	KEGG PATHWAY	map00750	5/1674	26/18577	0.0791131	0.28853	MsG0280011229.01|MsG0280006942.01|MsG0280011228.01|MsG0580024656.01|MsG0780036221.01	http://www.genome.jp/kegg-bin/show_pathway?map=map00750&multi_query=K06215+white,blue%0d%0aK13248+white,blue%0d%0a	Metabolism of cofactors and vitamins	Metabolism
11	Ubiquinone and other terpenoid-quinone biosynthesis	KEGG PATHWAY	map00130	11/1674	76/18577	0.0778315	0.292458	MsG0880044675.01|MsG0580025389.01|MsG0580024256.01|MsG0180003504.01|MsG0580028603.01|MsG0880044676.01|MsG0880047488.01|MsG0380015696.01|MsG0880047492.01|MsG0880047455.01|MsG0480018132.01	http://www.genome.jp/kegg-bin/show_pathway?map=map00130&multi_query=K00487+white,blue%0d%0aK01904+white,pink%0d%0aK09833+white,red%0d%0aK03809+white,blue%0d%0a	Metabolism of cofactors and vitamins	Metabolism
1	Aflatoxin biosynthesis	KEGG PATHWAY	map00254	1/1674	1/18577	0.0901114	0.319252	MsG0380015639.01	http://www.genome.jp/kegg-bin/show_pathway?map=map00254&multi_query=K11262+white,blue%0d%0a	Biosynthesis of other secondary metabolites	Metabolism
7	Folate biosynthesis	KEGG PATHWAY	map00790	7/1674	44/18577	0.0968292	0.324509	MsG0080048312.01|MsG0880042541.01|MsG0280006476.01|MsG0780041208.01|MsG0280010998.01|MsG0580024953.01|MsG0480022299.01	http://www.genome.jp/kegg-bin/show_pathway?map=map00790&multi_query=K01724+white,red%0d%0aK00079+white,blue%0d%0aK01633+white,red%0d%0aK14652+white,blue%0d%0aK01495+white,blue%0d%0a	Metabolism of cofactors and vitamins	Metabolism
22	Glycolysis / Gluconeogenesis	KEGG PATHWAY	map00010	22/1674	182/18577	0.0958768	0.330242	MsG0880046441.01|MsG0480022590.01|MsG0780036210.01|MsG0280006417.01|MsG0780039304.01|MsG0780041076.01|MsG0480018969.01|MsG0880045356.01|MsG0880046969.01|MsG0580024360.01|MsG0880046968.01|MsG0280008554.01|MsG0380016360.01|MsG0880046970.01|MsG0080048597.01|MsG0580026903.01|MsG0480019997.01|MsG0180001288.01|MsG0580029511.01|MsG0380017016.01|MsG0480023783.01|MsG0380016359.01	http://www.genome.jp/kegg-bin/show_pathway?map=map00010&multi_query=K03841+white,blue%0d%0aK00850+white,blue%0d%0aK00002+white,pink%0d%0aK01006+white,blue%0d%0aK01689+white,red%0d%0aK01792+white,pink%0d%0aK00895+white,red%0d%0aK00128+white,blue%0d%0aK01913+white,blue%0d%0aK01785+white,blue%0d%0aK01568+white,red%0d%0aK00121+white,pink%0d%0a	Carbohydrate metabolism	Metabolism
8	Phenylalanine, tyrosine and tryptophan biosynthesis	KEGG PATHWAY	map00400	8/1674	55/18577	0.11844	0.376578	MsG0680030866.01|MsG0580027880.01|MsG0480020595.01|MsG0280010592.01|MsG0380012089.01|MsG0180000530.01|MsG0780041217.01|MsG0280010484.01	http://www.genome.jp/kegg-bin/show_pathway?map=map00400&multi_query=K01850+white,blue%0d%0aK15849+white,blue%0d%0aK05359+white,blue%0d%0aK01626+white,blue%0d%0a	Amino acid metabolism	Metabolism
7	Nitrogen metabolism	KEGG PATHWAY	map00910	7/1674	46/18577	0.116111	0.37889	MsG0780040173.01|MsG0480020755.01|MsG0880046102.01|MsG0680031695.01|MsG0680030439.01|MsG0380015217.01|MsG0180003483.01	http://www.genome.jp/kegg-bin/show_pathway?map=map00910&multi_query=K01673+white,red%0d%0aK00261+white,blue%0d%0aK01915+white,blue%0d%0aK02575+white,blue%0d%0aK01674+white,blue%0d%0a	Energy metabolism	Metabolism
16	Glycerolipid metabolism	KEGG PATHWAY	map00561	16/1674	132/18577	0.136807	0.4241	MsG0480018969.01|MsG0880045356.01|MsG0580029736.01|MsG0780039438.01|MsG0180004855.01|MsG0880044570.01|MsG0280009691.01|MsG0480018607.01|MsG0180005959.01|MsG0480021218.01|MsG0380016359.01|MsG0180005917.01|MsG0780040405.01|MsG0480018321.01|MsG0780039304.01|MsG0380016360.01	http://www.genome.jp/kegg-bin/show_pathway?map=map00561&multi_query=K00002+white,pink%0d%0aK07407+white,blue%0d%0aK01054+white,pink%0d%0aK18693+white,blue%0d%0aK00128+white,blue%0d%0aK13508+white,pink%0d%0aK00901+white,blue%0d%0aK14674+white,blue%0d%0aK13513+white,red%0d%0aK00864+white,blue%0d%0a	Lipid metabolism	Metabolism
6	Zeatin biosynthesis	KEGG PATHWAY	map00908	6/1674	40/18577	0.146921	0.444346	MsG0480019150.01|MsG0780041022.01|MsG0180001050.01|MsG0780041024.01|MsG0180000459.01|MsG0780041030.01	http://www.genome.jp/kegg-bin/show_pathway?map=map00908&multi_query=K13495+white,blue%0d%0aK13496+white,pink%0d%0aK00279+white,blue%0d%0a	Metabolism of terpenoids and polyketides	Metabolism
8	Mismatch repair	KEGG PATHWAY	map03430	8/1674	59/18577	0.158591	0.457333	MsG0180000718.01|MsG0680031622.01|MsG0880046672.01|MsG0580025358.01|MsG0380014666.01|MsG0780040580.01|MsG0880046537.01|MsG0880046213.01	http://www.genome.jp/kegg-bin/show_pathway?map=map03430&multi_query=K10756+white,red%0d%0aK08735+white,red%0d%0aK10755+white,red%0d%0aK07466+white,red%0d%0aK04802+white,red%0d%0aK02328+white,red%0d%0aK10739+white,red%0d%0a	Replication and repair	Genetic Information Processing
4	Arachidonic acid metabolism	KEGG PATHWAY	map00590	4/1674	24/18577	0.165227	0.465641	MsG0680035830.01|MsG0780040405.01|MsG0180006231.01|MsG0480022299.01	http://www.genome.jp/kegg-bin/show_pathway?map=map00590&multi_query=K01254+white,red%0d%0aK00079+white,blue%0d%0aK18592+white,blue%0d%0aK14674+white,blue%0d%0a	Lipid metabolism	Metabolism
11	Alanine, aspartate and glutamate metabolism	KEGG PATHWAY	map00250	11/1674	87/18577	0.158115	0.466816	MsG0680032878.01|MsG0780040173.01|MsG0780038692.01|MsG0580028896.01|MsG0280009510.01|MsG0580028450.01|MsG0380017168.01|MsG0380018035.01|MsG0880046102.01|MsG0680031695.01|MsG0380015217.01	http://www.genome.jp/kegg-bin/show_pathway?map=map00250&multi_query=K00261+white,blue%0d%0aK17761+white,red%0d%0aK01953+white,red%0d%0aK13051+white,pink%0d%0aK01580+white,red%0d%0aK00764+white,blue%0d%0aK01915+white,blue%0d%0a	Amino acid metabolism	Metabolism
13	Arginine and proline metabolism	KEGG PATHWAY	map00330	13/1674	108/18577	0.173348	0.467286	MsG0780040428.01|MsG0380015175.01|MsG0780036812.01|MsG0780038866.01|MsG0080047878.01|MsG0480021333.01|MsG0480019185.01|MsG0380016360.01|MsG0680031116.01|MsG0380016359.01|MsG0380017898.01|MsG0480018921.01|MsG0480021433.01	http://www.genome.jp/kegg-bin/show_pathway?map=map00330&multi_query=K00318+white,blue%0d%0aK00286+white,red%0d%0aK00128+white,blue%0d%0aK01476+white,red%0d%0aK01581+white,blue%0d%0aK01583+white,blue%0d%0aK01426+white,blue%0d%0aK17839+white,blue%0d%0aK12657+white,red%0d%0a	Amino acid metabolism	Metabolism
1	Glycosphingolipid biosynthesis - lacto and neolacto series	KEGG PATHWAY	map00601	1/1674	2/18577	0.172107	0.474251	MsG0780039190.01	http://www.genome.jp/kegg-bin/show_pathway?map=map00601&multi_query=K01988+white,blue%0d%0a	Glycan biosynthesis and metabolism	Metabolism
8	Fatty acid elongation	KEGG PATHWAY	map00062	8/1674	61/18577	0.180781	0.476955	MsG0180004283.01|MsG0680031342.01|MsG0180004168.01|MsG0680034760.01|MsG0480020578.01|MsG0480020582.01|MsG0280010985.01|MsG0880046706.01	http://www.genome.jp/kegg-bin/show_pathway?map=map00062&multi_query=K15397+white,pink%0d%0a	Lipid metabolism	Metabolism
18	Photosynthesis	KEGG PATHWAY	map00195	18/1674	159/18577	0.186249	0.481143	MsG0380013971.01|MsG0380014016.01|MsG0480023187.01|MsG0380014035.01|MsG0380013967.01|MsG0380013942.01|MsG0380013943.01|MsG0280007042.01|MsG0380014050.01|MsG0380013956.01|MsG0180006020.01|MsG0380013977.01|MsG0380013938.01|MsG0080048560.01|MsG0380014023.01|MsG0580027677.01|MsG0880045275.01|MsG0280010704.01	http://www.genome.jp/kegg-bin/show_pathway?map=map00195&multi_query=K02112+white,red%0d%0aK02111+white,red%0d%0aK02690+white,red%0d%0aK02689+white,pink%0d%0aK02703+white,red%0d%0aK02637+white,red%0d%0aK02714+white,red%0d%0aK02704+white,red%0d%0aK02635+white,red%0d%0aK02639+white,red%0d%0aK08902+white,red%0d%0aK02707+white,red%0d%0a	Energy metabolism	Metabolism
13	Inositol phosphate metabolism	KEGG PATHWAY	map00562	13/1674	112/18577	0.207774	0.525794	MsG0480023525.01|MsG0880042495.01|MsG0180003702.01|MsG0480023344.01|MsG0580026645.01|MsG0880046067.01|MsG0880042808.01|MsG0880045165.01|MsG0580029195.01|MsG0880047306.01|MsG0580026644.01|MsG0380016893.01|MsG0580026643.01	http://www.genome.jp/kegg-bin/show_pathway?map=map00562&multi_query=K24221+white,blue%0d%0aK05857+white,blue%0d%0aK00921+white,red%0d%0aK01858+white,red%0d%0aK00889+white,red%0d%0aK00913+white,blue%0d%0aK00469+white,blue%0d%0aK22913+white,blue%0d%0a	Carbohydrate metabolism	Metabolism
26	Amino sugar and nucleotide sugar metabolism	KEGG PATHWAY	map00520	26/1674	245/18577	0.217316	0.538943	MsG0580028893.01|MsG0280011136.01|MsG0880042173.01|MsG0280008362.01|MsG0780041340.01|MsG0680031550.01|MsG0880046908.01|MsG0580026328.01|MsG0080049149.01|MsG0780036638.01|MsG0080047978.01|MsG0880045573.01|MsG0180005764.01|MsG0280008352.01|MsG0480023604.01|MsG0880045572.01|MsG0280008349.01|MsG0480021267.01|MsG0380016036.01|MsG0880047773.01|MsG0480023755.01|MsG0380018070.01|MsG0380017681.01|MsG05800…	http://www.genome.jp/kegg-bin/show_pathway?map=map00520&multi_query=K01183+white,pink%0d%0aK00847+white,red%0d%0aK00975+white,red%0d%0aK18677+white,red%0d%0aK00963+white,red%0d%0aK20547+white,blue%0d%0aK15920+white,red%0d%0aK00770+white,red%0d%0aK01784+white,blue%0d%0aK13379+white,red%0d%0aK12446+white,blue%0d%0aK00326+white,blue%0d%0aK00012+white,red%0d%0a	Carbohydrate metabolism	Metabolism
2	C5-Branched dibasic acid metabolism	KEGG PATHWAY	map00660	2/1674	10/18577	0.225852	0.549131	MsG0480019381.01|MsG0180004023.01	http://www.genome.jp/kegg-bin/show_pathway?map=map00660&multi_query=K01703+white,blue%0d%0a	Carbohydrate metabolism	Metabolism
2	Betalain biosynthesis	KEGG PATHWAY	map00965	2/1674	10/18577	0.225852	0.549131	MsG0180004328.01|MsG0180004203.01	http://www.genome.jp/kegg-bin/show_pathway?map=map00965&multi_query=K15777+white,blue%0d%0a	Biosynthesis of other secondary metabolites	Metabolism
13	Phagosome	KEGG PATHWAY	map04145	13/1674	116/18577	0.244928	0.562427	MsG0180002042.01|MsG0880045141.01|MsG0380017858.01|MsG0780040472.01|MsG0480018767.01|MsG0780039847.01|MsG0880045610.01|MsG0380017708.01|MsG0280010888.01|MsG0580026742.01|MsG0880047306.01|MsG0780040365.01|MsG0180005741.01	http://www.genome.jp/kegg-bin/show_pathway?map=map04145&multi_query=K08057+white,pink%0d%0aK09481+white,red%0d%0aK08488+white,blue%0d%0aK07374+white,red%0d%0aK07375+white,red%0d%0aK00921+white,red%0d%0aK04392+white,red%0d%0a	Transport and catabolism	Cellular Processes
4	Riboflavin metabolism	KEGG PATHWAY	map00740	4/1674	28/18577	0.242144	0.566525	MsG0080048312.01|MsG0480023641.01|MsG0280006476.01|MsG0280010998.01	http://www.genome.jp/kegg-bin/show_pathway?map=map00740&multi_query=K14652+white,blue%0d%0aK22912+white,blue%0d%0a	Metabolism of cofactors and vitamins	Metabolism
14	Glyoxylate and dicarboxylate metabolism	KEGG PATHWAY	map00630	14/1674	127/18577	0.253284	0.571041	MsG0280008554.01|MsG0580024643.01|MsG0780039859.01|MsG0280010144.01|MsG0580024537.01|MsG0180000417.01|MsG0080048697.01|MsG0280010143.01|MsG0680033159.01|MsG0680033089.01|MsG0780037988.01|MsG0380015217.01|MsG0180001784.01|MsG0080048636.01	http://www.genome.jp/kegg-bin/show_pathway?map=map00630&multi_query=K15919+white,red%0d%0aK01913+white,blue%0d%0aK01601+white,red%0d%0aK01638+white,red%0d%0aK00281+white,blue%0d%0aK19269+white,blue%0d%0aK01915+white,blue%0d%0aK00025+white,red%0d%0aK01433+white,blue%0d%0aK22133+white,blue%0d%0a	Carbohydrate metabolism	Metabolism
11	Nucleotide excision repair	KEGG PATHWAY	map03420	11/1674	98/18577	0.267114	0.581091	MsG0180000718.01|MsG0680031622.01|MsG0580025358.01|MsG0680034764.01|MsG0380014666.01|MsG0780040580.01|MsG0780037630.01|MsG0380015553.01|MsG0780037286.01|MsG0880046537.01|MsG0880046213.01	http://www.genome.jp/kegg-bin/show_pathway?map=map03420&multi_query=K03143+white,red%0d%0aK10756+white,red%0d%0aK10755+white,red%0d%0aK10846+white,blue%0d%0aK07466+white,red%0d%0aK04802+white,red%0d%0aK02325+white,red%0d%0aK02328+white,red%0d%0aK10739+white,red%0d%0a	Replication and repair	Genetic Information Processing
13	Phosphatidylinositol signaling system	KEGG PATHWAY	map04070	13/1674	119/18577	0.27432	0.586476	MsG0880047171.01|MsG0580025278.01|MsG0480023525.01|MsG0880047306.01|MsG0880047444.01|MsG0880044570.01|MsG0880045165.01|MsG0680030719.01|MsG0580029195.01|MsG0780036291.01|MsG0180003702.01|MsG0380016893.01|MsG0580025453.01	http://www.genome.jp/kegg-bin/show_pathway?map=map04070&multi_query=K05857+white,blue%0d%0aK00921+white,red%0d%0aK00913+white,blue%0d%0aK00901+white,blue%0d%0aK13024+white,blue%0d%0aK00889+white,red%0d%0aK02183+white,blue%0d%0a	Signal transduction	Environmental Information Processing
7	Arginine biosynthesis	KEGG PATHWAY	map00220	7/1674	59/18577	0.280007	0.588489	MsG0780040173.01|MsG0880046102.01|MsG0680031695.01|MsG0480019185.01|MsG0380015217.01|MsG0380017785.01|MsG0380017520.01	http://www.genome.jp/kegg-bin/show_pathway?map=map00220&multi_query=K01915+white,blue%0d%0aK00261+white,blue%0d%0aK00611+white,red%0d%0aK01476+white,red%0d%0aK00930+white,red%0d%0a	Amino acid metabolism	Metabolism
12	Ascorbate and aldarate metabolism	KEGG PATHWAY	map00053	12/1674	108/18577	0.265906	0.588791	MsG0880042495.01|MsG0480018969.01|MsG0880045356.01|MsG0580026328.01|MsG0580026645.01|MsG0180006179.01|MsG0380016360.01|MsG0580026644.01|MsG0380016359.01|MsG0580026643.01|MsG0780039304.01|MsG0380015859.01	http://www.genome.jp/kegg-bin/show_pathway?map=map00053&multi_query=K00002+white,pink%0d%0aK00128+white,blue%0d%0aK21888+white,red%0d%0aK00012+white,red%0d%0aK00469+white,blue%0d%0aK00423+white,blue%0d%0a	Carbohydrate metabolism	Metabolism
6	Carotenoid biosynthesis	KEGG PATHWAY	map00906	6/1674	50/18577	0.293656	0.596939	MsG0780040684.01|MsG0280009781.01|MsG0580025274.01|MsG0580028723.01|MsG0580029492.01|MsG0880045477.01	http://www.genome.jp/kegg-bin/show_pathway?map=map00906&multi_query=K17911+white,blue%0d%0aK02291+white,red%0d%0aK09840+white,red%0d%0aK09842+white,blue%0d%0aK09843+white,blue%0d%0a	Metabolism of terpenoids and polyketides	Metabolism
3	Photosynthesis - antenna proteins	KEGG PATHWAY	map00196	3/1674	21/18577	0.292563	0.60463	MsG0480022765.01|MsG0680030761.01|MsG0680030759.01	http://www.genome.jp/kegg-bin/show_pathway?map=map00196&multi_query=K08912+white,red%0d%0a	Energy metabolism	Metabolism
2	Limonene and pinene degradation	KEGG PATHWAY	map00903	2/1674	13/18577	0.329816	0.649162	MsG0380016359.01|MsG0380016360.01	http://www.genome.jp/kegg-bin/show_pathway?map=map00903&multi_query=K00128+white,blue%0d%0a	Metabolism of terpenoids and polyketides	Metabolism
6	Diterpenoid biosynthesis	KEGG PATHWAY	map00904	6/1674	52/18577	0.326214	0.652428	MsG0180005519.01|MsG0280007043.01|MsG0280007779.01|MsG0280009804.01|MsG0680033942.01|MsG0280011347.01	http://www.genome.jp/kegg-bin/show_pathway?map=map00904&multi_query=K04124+white,red%0d%0aK04125+white,pink%0d%0aK05282+white,blue%0d%0aK04123+white,blue%0d%0a	Metabolism of terpenoids and polyketides	Metabolism
2	Glucosinolate biosynthesis	KEGG PATHWAY	map00966	2/1674	14/18577	0.363821	0.704902	MsG0480019381.01|MsG0180004023.01	http://www.genome.jp/kegg-bin/show_pathway?map=map00966&multi_query=K01703+white,blue%0d%0a	Biosynthesis of other secondary metabolites	Metabolism
1	Caffeine metabolism	KEGG PATHWAY	map00232	1/1674	5/18577	0.376383	0.718023	MsG0280011054.01	http://www.genome.jp/kegg-bin/show_pathway?map=map00232&multi_query=K00106+white,blue%0d%0a	Biosynthesis of other secondary metabolites	Metabolism
3	Monobactam biosynthesis	KEGG PATHWAY	map00261	3/1674	25/18577	0.394514	0.741208	MsG0180005544.01|MsG0880043077.01|MsG0880043455.01	http://www.genome.jp/kegg-bin/show_pathway?map=map00261&multi_query=K13811+white,blue%0d%0aK00215+white,red%0d%0aK01714+white,blue%0d%0a	Biosynthesis of other secondary metabolites	Metabolism
3	Valine, leucine and isoleucine biosynthesis	KEGG PATHWAY	map00290	3/1674	25/18577	0.394514	0.741208	MsG0480021962.01|MsG0480019381.01|MsG0180004023.01	http://www.genome.jp/kegg-bin/show_pathway?map=map00290&multi_query=K01703+white,blue%0d%0aK00053+white,red%0d%0a	Amino acid metabolism	Metabolism
3	Thiamine metabolism	KEGG PATHWAY	map00730	3/1674	26/18577	0.419547	0.765056	MsG0580025203.01|MsG0180005666.01|MsG0380014728.01	http://www.genome.jp/kegg-bin/show_pathway?map=map00730&multi_query=K03147+white,red%0d%0aK03146+white,red%0d%0aK06928+white,red%0d%0a	Metabolism of cofactors and vitamins	Metabolism
9	Tryptophan metabolism	KEGG PATHWAY	map00380	9/1674	92/18577	0.449819	0.80837	MsG0580030145.01|MsG0180000632.01|MsG0480020076.01|MsG0480020072.01|MsG0380016360.01|MsG0380016112.01|MsG0380016359.01|MsG0380015776.01|MsG0480021433.01	http://www.genome.jp/kegg-bin/show_pathway?map=map00380&multi_query=K00128+white,blue%0d%0aK16903+white,red%0d%0aK13066+white,blue%0d%0aK11816+white,red%0d%0aK22588+white,pink%0d%0aK01426+white,blue%0d%0a	Amino acid metabolism	Metabolism
7	Porphyrin metabolism	KEGG PATHWAY	map00860	7/1674	72/18577	0.475323	0.842001	MsG0580029510.01|MsG0080049004.01|MsG0380017262.01|MsG0080048563.01|MsG0580024435.01|MsG0680035348.01|MsG0180001848.01	http://www.genome.jp/kegg-bin/show_pathway?map=map00860&multi_query=K10960+white,red%0d%0aK21480+white,blue%0d%0aK08099+white,red%0d%0aK22013+white,blue%0d%0aK01885+white,blue%0d%0aK19073+white,red%0d%0aK01772+white,blue%0d%0a	Metabolism of cofactors and vitamins	Metabolism
7	Sesquiterpenoid and triterpenoid biosynthesis	KEGG PATHWAY	map00909	7/1674	74/18577	0.50487	0.881744	MsG0280010322.01|MsG0780037676.01|MsG0380015134.01|MsG0480020344.01|MsG0880042578.01|MsG0280010323.01|MsG0780037640.01	http://www.genome.jp/kegg-bin/show_pathway?map=map00909&multi_query=K20658+white,red%0d%0aK15813+white,blue%0d%0aK15803+white,blue%0d%0aK00511+white,blue%0d%0a	Metabolism of terpenoids and polyketides	Metabolism
10	Carbon fixation in photosynthetic organisms	KEGG PATHWAY	map00710	10/1674	109/18577	0.524875	0.903952	MsG0880046968.01|MsG0280010144.01|MsG0280006417.01|MsG0480021968.01|MsG0080048697.01|MsG0280010143.01|MsG0880046969.01|MsG0880046970.01|MsG0780037988.01|MsG0180001784.01	http://www.genome.jp/kegg-bin/show_pathway?map=map00710&multi_query=K00025+white,red%0d%0aK01595+white,red%0d%0aK03841+white,blue%0d%0aK01006+white,blue%0d%0aK01601+white,red%0d%0a	Energy metabolism	Metabolism
5	Propanoate metabolism	KEGG PATHWAY	map00640	5/1674	55/18577	0.560041	0.925935	MsG0780040315.01|MsG0780039842.01|MsG0380015639.01|MsG0480023340.01|MsG0680030950.01	http://www.genome.jp/kegg-bin/show_pathway?map=map00640&multi_query=K00232+white,blue%0d%0aK11262+white,blue%0d%0aK01963+white,red%0d%0aK02160+white,red%0d%0a	Carbohydrate metabolism	Metabolism
6	Pantothenate and CoA biosynthesis	KEGG PATHWAY	map00770	6/1674	66/18577	0.55337	0.927269	MsG0380015175.01|MsG0480022625.01|MsG0480021962.01|MsG0780041287.01|MsG0380016359.01|MsG0380016360.01	http://www.genome.jp/kegg-bin/show_pathway?map=map00770&multi_query=K00128+white,blue%0d%0aK01431+white,blue%0d%0aK17839+white,blue%0d%0aK00859+white,blue%0d%0aK00053+white,red%0d%0a	Metabolism of cofactors and vitamins	Metabolism
2	Brassinosteroid biosynthesis	KEGG PATHWAY	map00905	2/1674	20/18577	0.549216	0.932914	MsG0680031007.01|MsG0880042748.01	http://www.genome.jp/kegg-bin/show_pathway?map=map00905&multi_query=K20623+white,blue%0d%0aK09590+white,red%0d%0a	Metabolism of terpenoids and polyketides	Metabolism
5	Biosynthesis of unsaturated fatty acids	KEGG PATHWAY	map01040	5/1674	57/18577	0.592581	0.966842	MsG0380016610.01|MsG0780040579.01|MsG0380016466.01|MsG0480023340.01|MsG0380016465.01	http://www.genome.jp/kegg-bin/show_pathway?map=map01040&multi_query=K10256+white,red%0d%0aK00232+white,blue%0d%0aK03921+white,red%0d%0a	Lipid metabolism	Metabolism
7	Pentose phosphate pathway	KEGG PATHWAY	map00030	7/1674	82/18577	0.616167	0.992269	MsG0780037751.01|MsG0480023783.01|MsG0180001288.01|MsG0280009888.01|MsG0880041970.01|MsG0280006417.01|MsG0580027701.01	http://www.genome.jp/kegg-bin/show_pathway?map=map00030&multi_query=K03841+white,blue%0d%0aK00850+white,blue%0d%0aK00852+white,red%0d%0aK00895+white,red%0d%0aK01057+white,red%0d%0aK00036+white,blue%0d%0a	Carbohydrate metabolism	Metabolism
2	Glycosphingolipid biosynthesis - globo and isoglobo series	KEGG PATHWAY	map00603	2/1674	23/18577	0.626646	0.996206	MsG0780039190.01|MsG0780039438.01	http://www.genome.jp/kegg-bin/show_pathway?map=map00603&multi_query=K01988+white,blue%0d%0aK07407+white,blue%0d%0a	Glycan biosynthesis and metabolism	Metabolism
2	Histidine metabolism	KEGG PATHWAY	map00340	2/1674	23/18577	0.626646	0.996206	MsG0380016359.01|MsG0380016360.01	http://www.genome.jp/kegg-bin/show_pathway?map=map00340&multi_query=K00128+white,blue%0d%0a	Amino acid metabolism	Metabolism
12	Spliceosome	KEGG PATHWAY	map03040	12/1674	425/18577	1	1	MsG0480018414.01|MsG0280008285.01|MsG0680031848.01|MsG0880047581.01|MsG0380013735.01|MsG0080048831.01|MsG0380012110.01|MsG0280006841.01|MsG0280009718.01|MsG0680030401.01|MsG0780041153.01|MsG0480020939.01	http://www.genome.jp/kegg-bin/show_pathway?map=map03040&multi_query=K12741+white,pink%0d%0aK12823+white,red%0d%0aK12813+white,blue%0d%0aK12733+white,red%0d%0aK03283+white,pink%0d%0aK12854+white,blue%0d%0a	Transcription	Genetic Information Processing
1	Non-homologous end-joining	KEGG PATHWAY	map03450	1/1674	11/18577	0.646212	1	MsG0180006261.01	http://www.genome.jp/kegg-bin/show_pathway?map=map03450&multi_query=K10884+white,red%0d%0a	Replication and repair	Genetic Information Processing
10	Glycine, serine and threonine metabolism	KEGG PATHWAY	map00260	10/1674	121/18577	0.659602	1	MsG0580024643.01|MsG0880046942.01|MsG0380017554.01|MsG0180005623.01|MsG0180005622.01|MsG0780041674.01|MsG0880046071.01|MsG0380015836.01|MsG0180000417.01|MsG0880045289.01	http://www.genome.jp/kegg-bin/show_pathway?map=map00260&multi_query=K00276+white,pink%0d%0aK15919+white,red%0d%0aK00130+white,blue%0d%0aK00306+white,blue%0d%0aK00281+white,blue%0d%0aK01620+white,blue%0d%0a	Amino acid metabolism	Metabolism
4	Steroid biosynthesis	KEGG PATHWAY	map00100	4/1674	50/18577	0.670973	1	MsG0880046170.01|MsG0780040405.01|MsG0480021740.01|MsG0380015134.01	http://www.genome.jp/kegg-bin/show_pathway?map=map00100&multi_query=K00511+white,blue%0d%0aK14674+white,blue%0d%0aK14423+white,red%0d%0aK09828+white,red%0d%0a	Lipid metabolism	Metabolism
2	Biotin metabolism	KEGG PATHWAY	map00780	2/1674	25/18577	0.67227	1	MsG0480021719.01|MsG0480022783.01	http://www.genome.jp/kegg-bin/show_pathway?map=map00780&multi_query=K00208+white,red%0d%0aK09458+white,red%0d%0a	Metabolism of cofactors and vitamins	Metabolism
2	Lysine biosynthesis	KEGG PATHWAY	map00300	2/1674	26/18577	0.69333	1	MsG0880043077.01|MsG0880043455.01	http://www.genome.jp/kegg-bin/show_pathway?map=map00300&multi_query=K00215+white,red%0d%0aK01714+white,blue%0d%0a	Amino acid metabolism	Metabolism
3	Butanoate metabolism	KEGG PATHWAY	map00650	3/1674	39/18577	0.69521	1	MsG0280008554.01|MsG0580028896.01|MsG0280009510.01	http://www.genome.jp/kegg-bin/show_pathway?map=map00650&multi_query=K01913+white,blue%0d%0aK01580+white,red%0d%0aK17761+white,red%0d%0a	Carbohydrate metabolism	Metabolism
5	Base excision repair	KEGG PATHWAY	map03410	5/1674	65/18577	0.708141	1	MsG0680031725.01|MsG0780040580.01|MsG0680034764.01|MsG0380014666.01|MsG0680031722.01	http://www.genome.jp/kegg-bin/show_pathway?map=map03410&multi_query=K02328+white,red%0d%0aK04802+white,red%0d%0aK02325+white,red%0d%0aK10801+white,red%0d%0a	Replication and repair	Genetic Information Processing
5	Sphingolipid metabolism	KEGG PATHWAY	map00600	5/1674	65/18577	0.708141	1	MsG0580026143.01|MsG0780036876.01|MsG0280006649.01|MsG0780039438.01|MsG0380011660.01	http://www.genome.jp/kegg-bin/show_pathway?map=map00600&multi_query=K04713+white,blue%0d%0aK07407+white,blue%0d%0aK01634+white,blue%0d%0aK04715+white,blue%0d%0aK04718+white,blue%0d%0a	Lipid metabolism	Metabolism
3	Nicotinate and nicotinamide metabolism	KEGG PATHWAY	map00760	3/1674	41/18577	0.727482	1	MsG0180004732.01|MsG0180004734.01|MsG0880045880.01	http://www.genome.jp/kegg-bin/show_pathway?map=map00760&multi_query=K18551+white,blue%0d%0aK00763+white,blue%0d%0a	Metabolism of cofactors and vitamins	Metabolism
9	Homologous recombination	KEGG PATHWAY	map03440	9/1674	116/18577	0.728442	1	MsG0180000718.01|MsG0580025358.01|MsG0780040771.01|MsG0180000006.01|MsG0380016092.01|MsG0580024039.01|MsG0780040580.01|MsG0880046537.01|MsG0180001055.01	http://www.genome.jp/kegg-bin/show_pathway?map=map03440&multi_query=K10683+white,red%0d%0aK07466+white,red%0d%0aK08775+white,red%0d%0aK10875+white,red%0d%0aK15362+white,red%0d%0aK02328+white,red%0d%0aK10728+white,red%0d%0aK10739+white,red%0d%0a	Replication and repair	Genetic Information Processing
3	Ether lipid metabolism	KEGG PATHWAY	map00565	3/1674	42/18577	0.742583	1	MsG0780040405.01|MsG0780039481.01|MsG0380017894.01	http://www.genome.jp/kegg-bin/show_pathway?map=map00565&multi_query=K14674+white,blue%0d%0aK01115+white,blue%0d%0a	Lipid metabolism	Metabolism
2	Glycosaminoglycan degradation	KEGG PATHWAY	map00531	2/1674	29/18577	0.749856	1	MsG0780036008.01|MsG0780041526.01	http://www.genome.jp/kegg-bin/show_pathway?map=map00531&multi_query=K10532+white,red%0d%0a	Glycan biosynthesis and metabolism	Metabolism
1	Sulfur relay system	KEGG PATHWAY	map04122	1/1674	15/18577	0.757574	1	MsG0180001856.01	http://www.genome.jp/kegg-bin/show_pathway?map=map04122&multi_query=K14169+white,red%0d%0a	Folding, sorting and degradation	Genetic Information Processing
7	Fructose and mannose metabolism	KEGG PATHWAY	map00051	7/1674	95/18577	0.763538	1	MsG0580028982.01|MsG0480019898.01|MsG0480021881.01|MsG0180001288.01|MsG0580024997.01|MsG0480023783.01|MsG0280006417.01	http://www.genome.jp/kegg-bin/show_pathway?map=map00051&multi_query=K00847+white,red%0d%0aK00850+white,blue%0d%0aK03841+white,blue%0d%0aK19355+white,pink%0d%0aK00895+white,red%0d%0a	Carbohydrate metabolism	Metabolism
12	Glycerophospholipid metabolism	KEGG PATHWAY	map00564	12/1674	158/18577	0.772833	1	MsG0780037351.01|MsG0780039481.01|MsG0180005414.01|MsG0580029736.01|MsG0780040005.01|MsG0280009691.01|MsG0480018607.01|MsG0480021218.01|MsG0180005917.01|MsG0780040405.01|MsG0880044570.01|MsG0380017894.01	http://www.genome.jp/kegg-bin/show_pathway?map=map00564&multi_query=K25193+white,red%0d%0aK18696+white,blue%0d%0aK18693+white,blue%0d%0aK01115+white,blue%0d%0aK13508+white,pink%0d%0aK01126+white,blue%0d%0aK00901+white,blue%0d%0aK14674+white,blue%0d%0aK13513+white,red%0d%0a	Lipid metabolism	Metabolism
4	SNARE interactions in vesicular transport	KEGG PATHWAY	map04130	4/1674	61/18577	0.81163	1	MsG0780041198.01|MsG0880045141.01|MsG0180003240.01|MsG0180003241.01	http://www.genome.jp/kegg-bin/show_pathway?map=map04130&multi_query=K08488+white,blue%0d%0aK08486+white,blue%0d%0a	Folding, sorting and degradation	Genetic Information Processing
2	One carbon pool by folate	KEGG PATHWAY	map00670	2/1674	34/18577	0.824144	1	MsG0580029969.01|MsG0580024537.01	http://www.genome.jp/kegg-bin/show_pathway?map=map00670&multi_query=K01433+white,blue%0d%0aK00602+white,red%0d%0a	Metabolism of cofactors and vitamins	Metabolism
2	Selenocompound metabolism	KEGG PATHWAY	map00450	2/1674	35/18577	0.836383	1	MsG0380015975.01|MsG0180005544.01	http://www.genome.jp/kegg-bin/show_pathway?map=map00450&multi_query=K01761+white,red%0d%0aK13811+white,blue%0d%0a	Metabolism of other amino acids	Metabolism
2	Taurine and hypotaurine metabolism	KEGG PATHWAY	map00430	2/1674	35/18577	0.836383	1	MsG0680035830.01|MsG0580028896.01	http://www.genome.jp/kegg-bin/show_pathway?map=map00430&multi_query=K01580+white,red%0d%0aK18592+white,blue%0d%0a	Metabolism of other amino acids	Metabolism
9	Peroxisome	KEGG PATHWAY	map04146	9/1674	133/18577	0.857117	1	MsG0280011054.01|MsG0780040334.01|MsG0180001085.01|MsG0380017554.01|MsG0180003070.01|MsG0480023340.01|MsG0280010254.01|MsG0180002545.01|MsG0680030294.01	http://www.genome.jp/kegg-bin/show_pathway?map=map04146&multi_query=K13356+white,red%0d%0aK13348+white,blue%0d%0aK12261+white,blue%0d%0aK00306+white,blue%0d%0aK04564+white,red%0d%0aK00106+white,blue%0d%0aK00232+white,blue%0d%0aK01897+white,red%0d%0aK13347+white,red%0d%0a	Transport and catabolism	Cellular Processes
1	Stilbenoid, diarylheptanoid and gingerol biosynthesis	KEGG PATHWAY	map00945	1/1674	26/18577	0.914308	1	MsG0580028603.01	http://www.genome.jp/kegg-bin/show_pathway?map=map00945&multi_query=K00487+white,blue%0d%0a	Biosynthesis of other secondary metabolites	Metabolism
2	Autophagy - other	KEGG PATHWAY	map04136	2/1674	46/18577	0.928098	1	MsG0880047229.01|MsG0380016793.01	http://www.genome.jp/kegg-bin/show_pathway?map=map04136&multi_query=K08331+white,blue%0d%0aK08341+white,blue%0d%0a	Transport and catabolism	Cellular Processes
3	Lysine degradation	KEGG PATHWAY	map00310	3/1674	67/18577	0.947887	1	MsG0380016359.01|MsG0380016360.01|MsG0380017554.01	http://www.genome.jp/kegg-bin/show_pathway?map=map00310&multi_query=K00128+white,blue%0d%0aK00306+white,blue%0d%0a	Amino acid metabolism	Metabolism
16	Oxidative phosphorylation	KEGG PATHWAY	map00190	16/1674	255/18577	0.956187	1	MsG0480022486.01|MsG0380013929.01|MsG0880042877.01|MsG0680033792.01|MsG0280008226.01|MsG0380013968.01|MsG0480022509.01|MsG0380013942.01|MsG0280007042.01|MsG0380013915.01|MsG0780041825.01|MsG0580028442.01|MsG0080047803.01|MsG0480020052.01|MsG0380014035.01|MsG0380017007.01	http://www.genome.jp/kegg-bin/show_pathway?map=map00190&multi_query=K02112+white,red%0d%0aK03949+white,red%0d%0aK03885+white,blue%0d%0aK03955+white,red%0d%0aK01507+white,blue%0d%0aK02111+white,red%0d%0aK01535+white,pink%0d%0aK05573+white,red%0d%0aK05577+white,red%0d%0aK05579+white,red%0d%0a	Energy metabolism	Metabolism
1	Other glycan degradation	KEGG PATHWAY	map00511	1/1674	36/18577	0.966725	1	MsG0180005790.01	http://www.genome.jp/kegg-bin/show_pathway?map=map00511&multi_query=K15923+white,red%0d%0a	Glycan biosynthesis and metabolism	Metabolism
3	Terpenoid backbone biosynthesis	KEGG PATHWAY	map00900	3/1674	76/18577	0.972351	1	MsG0580029510.01|MsG0880042291.01|MsG0480021212.01	http://www.genome.jp/kegg-bin/show_pathway?map=map00900&multi_query=K10960+white,red%0d%0aK03527+white,blue%0d%0aK00099+white,blue%0d%0a	Metabolism of terpenoids and polyketides	Metabolism
3	Valine, leucine and isoleucine degradation	KEGG PATHWAY	map00280	3/1674	78/18577	0.976058	1	MsG0380016359.01|MsG0480018442.01|MsG0380016360.01	http://www.genome.jp/kegg-bin/show_pathway?map=map00280&multi_query=K00128+white,blue%0d%0aK18660+white,blue%0d%0a	Amino acid metabolism	Metabolism
3	Protein export	KEGG PATHWAY	map03060	3/1674	80/18577	0.979288	1	MsG0180004492.01|MsG0280011413.01|MsG0280010888.01	http://www.genome.jp/kegg-bin/show_pathway?map=map03060&multi_query=K03106+white,red%0d%0aK09481+white,red%0d%0aK03116+white,red%0d%0a	Folding, sorting and degradation	Genetic Information Processing
6	RNA polymerase	KEGG PATHWAY	map03020	6/1674	130/18577	0.980439	1	MsG0380013959.01|MsG0680032935.01|MsG0180004453.01|MsG0380017365.01|MsG0280009709.01|MsG0180004097.01	http://www.genome.jp/kegg-bin/show_pathway?map=map03020&multi_query=K03006+white,blue%0d%0aK16253+white,red%0d%0aK16252+white,red%0d%0aK03046+white,red%0d%0aK03026+white,blue%0d%0a	Transcription	Genetic Information Processing
2	N-Glycan biosynthesis	KEGG PATHWAY	map00510	2/1674	64/18577	0.982719	1	MsG0380012367.01|MsG0480022946.01	http://www.genome.jp/kegg-bin/show_pathway?map=map00510&multi_query=K01228+white,blue%0d%0aK12668+white,red%0d%0a	Glycan biosynthesis and metabolism	Metabolism
1	Various types of N-glycan biosynthesis	KEGG PATHWAY	map00513	1/1674	45/18577	0.985804	1	MsG0380012367.01	http://www.genome.jp/kegg-bin/show_pathway?map=map00513&multi_query=K12668+white,red%0d%0a	Glycan biosynthesis and metabolism	Metabolism
14	Pentose and glucuronate interconversions	KEGG PATHWAY	map00040	14/1674	268/18577	0.992735	1	MsG0880045766.01|MsG0580028893.01|MsG0780038307.01|MsG0480019954.01|MsG0480018969.01|MsG0480019215.01|MsG0880045356.01|MsG0580026328.01|MsG0780041316.01|MsG0480019217.01|MsG0580025736.01|MsG0780041317.01|MsG0180004756.01|MsG0780039304.01	http://www.genome.jp/kegg-bin/show_pathway?map=map00040&multi_query=K01184+white,blue%0d%0aK00963+white,red%0d%0aK01051+white,blue%0d%0aK01213+white,blue%0d%0aK00012+white,red%0d%0aK01728+white,blue%0d%0aK00002+white,pink%0d%0a	Carbohydrate metabolism	Metabolism
2	Basal transcription factors	KEGG PATHWAY	map03022	2/1674	78/18577	0.994547	1	MsG0880047208.01|MsG0380015553.01	http://www.genome.jp/kegg-bin/show_pathway?map=map03022&multi_query=K03143+white,red%0d%0aK03133+white,red%0d%0a	Transcription	Genetic Information Processing
2	Viral life cycle - HIV-1	KEGG PATHWAY	map03250	2/1674	84/18577	0.996702	1	MsG0280009299.01|MsG0680030468.01	http://www.genome.jp/kegg-bin/show_pathway?map=map03250&multi_query=K22544+white,blue%0d%0aK12194+white,blue%0d%0a	Information processing in viruses	Genetic Information Processing
19	Endocytosis	KEGG PATHWAY	map04144	19/1674	365/18577	0.997772	1	MsG0480021001.01|MsG0480020957.01|MsG0780039481.01|MsG0480023525.01|MsG0180005334.01|MsG0680031848.01|MsG0880047581.01|MsG0280007431.01|MsG0280009299.01|MsG0180002912.01|MsG0180006067.01|MsG0280010002.01|MsG0680034884.01|MsG0180003702.01|MsG0480020986.01|MsG0380016893.01|MsG0480020939.01|MsG0380017894.01|MsG0280008285.01	http://www.genome.jp/kegg-bin/show_pathway?map=map04144&multi_query=K12194+white,blue%0d%0aK01115+white,blue%0d%0aK12471+white,blue%0d%0aK00889+white,red%0d%0aK12486+white,blue%0d%0aK03283+white,pink%0d%0aK05754+white,red%0d%0aK12483+white,red%0d%0aK10365+white,red%0d%0aK07904+white,pink%0d%0a	Transport and catabolism	Cellular Processes
32	Ribosome	KEGG PATHWAY	map03010	32/1674	554/18577	0.998322	1	MsG0380013950.01|MsG0380013970.01|MsG0380014044.01|MsG0380013547.01|MsG0880044414.01|MsG0680031467.01|MsG0380011642.01|MsG0880044444.01|MsG0080049080.01|MsG0080049078.01|MsG0380017006.01|MsG0080049159.01|MsG0580024139.01|MsG0380015596.01|MsG0180005361.01|MsG0880044904.01|MsG0380014057.01|MsG0180003729.01|MsG0380013949.01|MsG0380014049.01|MsG0180004727.01|MsG0380013995.01|MsG0180002438.01|MsG08800…	http://www.genome.jp/kegg-bin/show_pathway?map=map03010&multi_query=K02868+white,pink%0d%0aK02957+white,red%0d%0aK02956+white,red%0d%0aK02954+white,red%0d%0aK02866+white,blue%0d%0aK02950+white,red%0d%0aK02887+white,red%0d%0aK02886+white,red%0d%0aK02881+white,blue%0d%0aK02882+white,red%0d%0aK02993+white,red%0d%0aK02992+white,red%0d%0aK02997+white,red%0d%0aK02975+white,red%0d%0aK02979+white,red%0d%…	Translation	Genetic Information Processing
6	RNA degradation	KEGG PATHWAY	map03018	6/1674	178/18577	0.999117	1	MsG0780041076.01|MsG0480020781.01|MsG0180003243.01|MsG0380017156.01|MsG0380017155.01|MsG0480023783.01	http://www.genome.jp/kegg-bin/show_pathway?map=map03018&multi_query=K12606+white,blue%0d%0aK12587+white,red%0d%0aK00850+white,blue%0d%0aK13126+white,red%0d%0aK01689+white,red%0d%0a	Folding, sorting and degradation	Genetic Information Processing
1	Citrate cycle (TCA cycle)	KEGG PATHWAY	map00020	1/1674	75/18577	0.999173	1	MsG0180001784.01	http://www.genome.jp/kegg-bin/show_pathway?map=map00020&multi_query=K00025+white,red%0d%0a	Carbohydrate metabolism	Metabolism
12	Nucleocytoplasmic transport	KEGG PATHWAY	map03013	12/1674	288/18577	0.999517	1	MsG0180000384.01|MsG0880042338.01|MsG0780040333.01|MsG0880047247.01|MsG0480018115.01|MsG0880047386.01|MsG0080048220.01|MsG0880047240.01|MsG0880046943.01|MsG0580024907.01|MsG0680034706.01|MsG0180000068.01	http://www.genome.jp/kegg-bin/show_pathway?map=map03013&multi_query=K14314+white,blue%0d%0aK13175+white,red%0d%0aK15042+white,red%0d%0aK14299+white,red%0d%0aK14298+white,red%0d%0aK03231+white,pink%0d%0aK14320+white,red%0d%0aK14291+white,blue%0d%0a	Translation	Genetic Information Processing
3	Aminoacyl-tRNA biosynthesis	KEGG PATHWAY	map00970	3/1674	151/18577	0.999922	1	MsG0080047802.01|MsG0180001848.01|MsG0080048845.01	http://www.genome.jp/kegg-bin/show_pathway?map=map00970&multi_query=K01868+white,blue%0d%0aK01885+white,blue%0d%0aK01876+white,red%0d%0a	Translation	Genetic Information Processing
22	Protein processing in endoplasmic reticulum	KEGG PATHWAY	map04141	22/1674	495/18577	0.999971	1	MsG0780040010.01|MsG0480022345.01|MsG0880047581.01|MsG0580026742.01|MsG0480022946.01|MsG0480022396.01|MsG0680031794.01|MsG0280010888.01|MsG0280007388.01|MsG0680032925.01|MsG0480019968.01|MsG0480022348.01|MsG0380012367.01|MsG0480022344.01|MsG0280008719.01|MsG0480020026.01|MsG0280008285.01|MsG0280007225.01|MsG0480022342.01|MsG0780039847.01|MsG0680031848.01|MsG0480020939.01	http://www.genome.jp/kegg-bin/show_pathway?map=map04141&multi_query=K08057+white,pink%0d%0aK09481+white,red%0d%0aK10666+white,blue%0d%0aK12668+white,red%0d%0aK13993+white,pink%0d%0aK10950+white,blue%0d%0aK14009+white,red%0d%0aK01228+white,blue%0d%0aK04079+white,red%0d%0aK13250+white,red%0d%0aK03283+white,pink%0d%0a	Folding, sorting and degradation	Genetic Information Processing
2	Ribosome biogenesis in eukaryotes	KEGG PATHWAY	map03008	2/1674	141/18577	0.999976	1	MsG0280006514.01|MsG0280006639.01	http://www.genome.jp/kegg-bin/show_pathway?map=map03008&multi_query=K14553+white,red%0d%0a	Translation	Genetic Information Processing
2	mRNA surveillance pathway	KEGG PATHWAY	map03015	2/1674	178/18577	0.999999	1	MsG0380017155.01|MsG0380017156.01	http://www.genome.jp/kegg-bin/show_pathway?map=map03015&multi_query=K13126+white,red%0d%0a	Translation	Genetic Information Processing
10	Ubiquitin mediated proteolysis	KEGG PATHWAY	map04120	10/1674	361/18577	1	1	MsG0380015340.01|MsG0180001676.01|MsG0480021773.01|MsG0280007827.01|MsG0280006725.01|MsG0480022389.01|MsG0480022347.01|MsG0880043144.01|MsG0580024276.01|MsG0380017515.01	http://www.genome.jp/kegg-bin/show_pathway?map=map04120&multi_query=K10581+white,blue%0d%0aK03869+white,blue%0d%0aK10144+white,red%0d%0aK10576+white,blue%0d%0aK08770+white,blue%0d%0aK10589+white,blue%0d%0aK06688+white,red%0d%0aK03363+white,red%0d%0aK03364+white,red%0d%0a	Folding, sorting and degradation	Genetic Information Processing
