# Supplementary material for: Transcriptomic Analysis to Identify Melatonin-mediated Salt-responsive Genes During the Germinated Stage of Alfalfa
Source: Preprints.org preprint supplement (doi:10.20944/preprints202403.0648.v1), 2024-03-12
Supplement: Supplementary file 7 [file Table S7.xlsx]

## Sheet: Table S8
Supplemental table S7. Top 30 hub genes in the turquoise module
gene id	gene name	Connectivity	module
MsG0180000221.01	MsG0180000221.01	1335.46	turquoise
MsG0180000438.01	MsG0180000438.01	1328.2	turquoise
MsG0180001122.01	MsG0180001122.01	1365.22	turquoise
MsG0180003533.01	MsG0180003533.01	1388.95	turquoise
MsG0180005934.01	MsG0180005934.01	1367.93	turquoise
MsG0280006356.01	MsG0280006356.01	1337.48	turquoise
MsG0280007369.01	MsG0280007369.01	1325.07	turquoise
MsG0280008073.01	MsG0280008073.01	1347.43	turquoise
MsG0380011663.01	MsG0380011663.01	1341.97	turquoise
MsG0380013078.01	MsG0380013078.01	1336.2	turquoise
MsG0380013300.01	MsG0380013300.01	1367.05	turquoise
MsG0380014734.01	MsG0380014734.01	1322.61	turquoise
MsG0380015408.01	MsG0380015408.01	1353.25	turquoise
MsG0380016976.01	MsG0380016976.01	1356.53	turquoise
MsG0480020400.01	MsG0480020400.01	1330.57	turquoise
MsG0480022179.01	MsG0480022179.01	1357.54	turquoise
MsG0580025399.01	MsG0580025399.01	1323.48	turquoise
MsG0580028560.01	MsG0580028560.01	1373.22	turquoise
MsG0580029930.01	MsG0580029930.01	1340.35	turquoise
MsG0680031695.01	MsG0680031695.01	1337.03	turquoise
MsG0680034195.01	MsG0680034195.01	1327.44	turquoise
MsG0780036588.01	MsG0780036588.01	1339.25	turquoise
MsG0780039190.01	MsG0780039190.01	1323.71	turquoise
MsG0780040405.01	MsG0780040405.01	1354.81	turquoise
MsG0780041000.01	MsG0780041000.01	1358.39	turquoise
MsG0880042619.01	MsG0880042619.01	1328.29	turquoise
MsG0880044083.01	MsG0880044083.01	1324.61	turquoise
MsG0880045861.01	MsG0880045861.01	1401.29	turquoise
MsG0880046417.01	MsG0880046417.01	1332.1	turquoise
MsG0880047660.01	MsG0880047660.01	1388.94	turquoise
